# Supplementary material
Source: Research Square preprint supplement (doi:10.21203/rs.3.rs-9334205/v1)
Supplement: Supplementary file 1 [file b01d54799480690e5bd1903c.pdf]

*Supporting Information*

**Structural evolution and combustion energy of Al–B clusters**

Elizaveta E. Vaneeva\*,<sup>1,2</sup> Anastasiia A. Mikhailova<sup>1</sup>, Sergey V. Lepeshkin,<sup>1,2</sup> Alexey P. Maltsev<sup>1</sup> and Artem R. Oganov<sup>1</sup>

<sup>1</sup> Skolkovo Institute of Science and Technology, Bolshoy Boulevard 30, bld. 1, 121205 Moscow, Russian Federation

<sup>2</sup> Lebedev Physical Institute, Russian Academy of Sciences, Leninsky Ave. 53, 119991 Moscow, Russian Federation

\*[Elizaveta.Vaneeva@skoltech.ru](mailto:Elizaveta.Vaneeva@skoltech.ru)

## Section 1

Table S1. Values of  $\Delta^2_{\min}$ ,  $E_{\text{frag}}$  and fragmentation channels of  $\text{Al}_n\text{B}_m$  clusters ( $0 \leq n, m \leq 15$ ).

| Nanocluster | $\Delta^2_{\min}$ (eV) | $E_{\text{frag}}$ (eV) | Fragment 1 | Fragment 2 |
|-------------|------------------------|------------------------|------------|------------|
| B2          | -3.29971               | 2.57979                | B1         | B1         |
| B3          | 0.52408                | 5.8795                 | B1         | B2         |
| B4          | 0.37515                | 5.35542                | B1         | B3         |
| B5          | 0.51882                | 4.98028                | B1         | B4         |
| B6          | -1.47892               | 4.46145                | B1         | B5         |
| B7          | -0.14156               | 5.94037                | B1         | B6         |
| B8          | 1.96302                | 6.08193                | B1         | B7         |
| B9          | -2.10124               | 4.11891                | B1         | B8         |
| B10         | 0.96598                | 6.22015                | B1         | B9         |
| B11         | -0.40039               | 5.25417                | B1         | B10        |
| B12         | 1.11977                | 5.65456                | B1         | B11        |
| B13         | -0.49198               | 4.53479                | B1         | B12        |
| B14         | 0.14374                | 5.02677                | B1         | B13        |
| B15         | -0.38101               | 4.88304                | B1         | B14        |
| Al1B1       | -2.61161               | 1.82648                | B1         | Al1        |
| Al1B2       | -0.62785               | 3.68478                | B2         | Al1        |
| Al1B3       | -0.00583               | 2.87121                | B3         | Al1        |
| Al1B4       | -0.2551                | 2.57348                | B4         | Al1        |
| Al1B5       | -0.0315                | 2.7436                 | B5         | Al1        |
| Al1B6       | -0.11495               | 3.46405                | B6         | Al1        |
| Al1B7       | -0.91552               | 2.82053                | B7         | Al1        |
| Al1B8       | 0.27237                | 2.95097                | B8         | Al1        |

|        |          |         |     |        |
|--------|----------|---------|-----|--------|
| A11B9  | 0.1089   | 3.73166 | B9  | A11    |
| A11B10 | -1.15933 | 2.3022  | B10 | A11    |
| A11B11 | 1.34406  | 2.99806 | B11 | A11    |
| A11B12 | -1.28766 | 1.55549 | B12 | A11    |
| A11B13 | 0.29041  | 2.52035 | B13 | A11    |
| A11B14 | -0.37217 | 2.27968 | B14 | A11    |
| A11B15 | 0.11623  | 2.55492 | B15 | A11    |
| A12    | -0.58092 | 1.30325 | A11 | A11    |
| A12B1  | -1.55048 | 2.65681 | A11 | A11B1  |
| A12B2  | -0.26321 | 2.94924 | A11 | A11B2  |
| A12B3  | -0.15711 | 2.87704 | A11 | A11B3  |
| A12B4  | 0.2029   | 2.82858 | A11 | A11B4  |
| A12B5  | -0.7263  | 2.31485 | A11 | A11B5  |
| A12B6  | -0.54974 | 2.49591 | A11 | A11B6  |
| A12B7  | 0.13351  | 3.11177 | A11 | A11B7  |
| A12B8  | 0.98394  | 2.6786  | A11 | A11B8  |
| A12B9  | -1.32706 | 2.20745 | A11 | A11B9  |
| A12B10 | 1.18319  | 3.17226 | A11 | A11B10 |
| A12B11 | -0.98099 | 1.654   | A11 | A11B11 |
| A12B12 | 0.43139  | 2.8015  | A11 | A11B12 |
| A12B13 | -0.20625 | 2.22994 | A11 | A11B13 |
| A12B14 | -0.60032 | 2.26042 | A11 | A11B14 |
| A12B15 | -0.18562 | 2.43869 | A11 | A11B15 |
| A13B0  | 0.14478  | 1.88416 | A11 | A12    |
| A13B1  | -0.43149 | 2.88257 | A11 | A12B1  |

|        |          |         |     |        |
|--------|----------|---------|-----|--------|
| A13B2  | -0.65595 | 2.76199 | A11 | A12B2  |
| A13B3  | 0.54328  | 3.03414 | A11 | A12B3  |
| A13B4  | -0.44114 | 2.62568 | A11 | A12B4  |
| A13B5  | -0.30334 | 3.03093 | A11 | A12B5  |
| A13B6  | -0.05641 | 3.01322 | A11 | A12B6  |
| A13B7  | 0.13834  | 2.50219 | A11 | A12B7  |
| A13B8  | -0.98209 | 1.69466 | A11 | A12B8  |
| A13B9  | 0.62477  | 2.81778 | A11 | A12B9  |
| A13B10 | -0.15088 | 1.98907 | A11 | A12B10 |
| A13B11 | 0.11048  | 2.63499 | A11 | A12B11 |
| A13B12 | -0.45225 | 2.24271 | A11 | A12B12 |
| A13B13 | -0.11957 | 2.43618 | A11 | A12B13 |
| A13B14 | 0.14101  | 2.86074 | A11 | A12B14 |
| A13B15 | 0.23264  | 2.62431 | A11 | A12B15 |
| A14B0  | -0.51777 | 1.73938 | A11 | A13    |
| A14B1  | -0.30831 | 2.416   | A11 | A13B1  |
| A14B2  | 0.37606  | 2.96943 | A11 | A13B2  |
| A14B3  | 0.04998  | 2.49086 | A11 | A13B3  |
| A14B4  | -0.159   | 2.62742 | A11 | A13B4  |
| A14B5  | -0.3069  | 2.48184 | A11 | A13B5  |
| A14B6  | -0.3803  | 2.33982 | A11 | A13B6  |
| A14B7  | -0.39016 | 2.36384 | A11 | A13B7  |
| A14B8  | 0.43341  | 2.67674 | A11 | A13B8  |
| A14B9  | -0.79939 | 1.75502 | A11 | A13B9  |
| A14B10 | -0.17952 | 1.99854 | A11 | A13B10 |

|        |          |         |     |        |
|--------|----------|---------|-----|--------|
| A14B11 | -0.31258 | 2.13522 | A11 | A13B11 |
| A14B12 | 0.39256  | 2.69496 | A11 | A13B12 |
| A14B13 | -0.76905 | 2.37365 | A11 | A13B13 |
| A14B14 | 0.65161  | 2.70183 | A11 | A13B14 |
| A14B15 | -0.67753 | 2.39168 | A11 | A13B15 |
| A15B0  | -0.03447 | 2.25715 | A11 | A14    |
| A15B1  | 0.0436   | 2.41537 | A11 | A14B1  |
| A15B2  | -0.61347 | 2.04222 | A11 | A14B2  |
| A15B3  | -0.24945 | 2.22706 | A11 | A14B3  |
| A15B4  | -0.14346 | 2.4875  | A11 | A14B4  |
| A15B5  | -0.04972 | 2.7324  | A11 | A14B5  |
| A15B6  | -0.26862 | 2.72012 | A11 | A14B6  |
| A15B7  | 0.48189  | 2.754   | A11 | A14B7  |
| A15B8  | -0.16701 | 2.24334 | A11 | A14B8  |
| A15B9  | 0.14695  | 2.55441 | A11 | A14B9  |
| A15B10 | -0.53281 | 2.17806 | A11 | A14B10 |
| A15B11 | -0.42688 | 2.24585 | A11 | A14B11 |
| A15B12 | -0.37418 | 2.3024  | A11 | A14B12 |
| A15B13 | 0.42196  | 2.77181 | A11 | A14B13 |
| A15B14 | -0.80807 | 2.05022 | A11 | A14B14 |
| A15B15 | 0.98736  | 2.91603 | A11 | A14B15 |
| A16B0  | -0.58445 | 2.29162 | A11 | A15    |
| A16B1  | 0.01928  | 2.37177 | A11 | A15B1  |
| A16B2  | 0.28117  | 2.65569 | A11 | A15B2  |
| A16B3  | -0.35469 | 2.47651 | A11 | A15B3  |

|        |          |         |     |        |
|--------|----------|---------|-----|--------|
| A16B4  | -0.02714 | 2.62641 | A11 | A15B4  |
| A16B5  | -0.36468 | 2.57392 | A11 | A15B5  |
| A16B6  | 0.42343  | 2.76904 | A11 | A15B6  |
| A16B7  | 0.05537  | 2.27212 | A11 | A15B7  |
| A16B8  | 0.0857   | 2.4055  | A11 | A15B8  |
| A16B9  | -0.44822 | 2.28617 | A11 | A15B9  |
| A16B10 | -0.02536 | 2.71087 | A11 | A15B10 |
| A16B11 | -0.3433  | 2.67273 | A11 | A15B11 |
| A16B12 | 0.75645  | 2.67657 | A11 | A15B12 |
| A16B13 | -1.18138 | 1.94868 | A11 | A15B13 |
| A16B14 | 0.85025  | 2.82412 | A11 | A15B14 |
| A16B15 | -0.71464 | 1.85951 | A11 | A15B15 |
| A17B0  | 0.933    | 2.87607 | A11 | A16    |
| A17B1  | -0.39391 | 2.30374 | A11 | A16B1  |
| A17B2  | -0.65312 | 2.1446  | A11 | A16B2  |
| A17B3  | -0.26904 | 2.4419  | A11 | A16B3  |
| A17B4  | -0.11218 | 2.65355 | A11 | A16B4  |
| A17B5  | 0.86625  | 2.93859 | A11 | A16B5  |
| A17B6  | -0.38652 | 2.04764 | A11 | A16B6  |
| A17B7  | -0.47386 | 1.96663 | A11 | A16B7  |
| A17B8  | -0.66361 | 2.04104 | A11 | A16B8  |
| A17B9  | 0.40095  | 2.73439 | A11 | A16B9  |
| A17B10 | -0.30708 | 2.6297  | A11 | A16B10 |
| A17B11 | 0.72035  | 2.80674 | A11 | A16B11 |
| A17B12 | -0.85857 | 1.92012 | A11 | A16B12 |

|        |          |         |     |        |
|--------|----------|---------|-----|--------|
| A17B13 | 0.79988  | 2.93762 | A11 | A16B13 |
| A17B14 | -0.53206 | 1.97387 | A11 | A16B14 |
| A17B15 | 0.5065   | 2.57415 | A11 | A16B15 |
| A18B0  | -0.10982 | 1.94307 | A11 | A17    |
| A18B1  | -0.79187 | 2.17141 | A11 | A17B1  |
| A18B2  | 0.74157  | 2.79772 | A11 | A17B2  |
| A18B3  | -0.81811 | 2.50719 | A11 | A17B3  |
| A18B4  | 0.86991  | 2.76573 | A11 | A17B4  |
| A18B5  | -0.08751 | 2.07234 | A11 | A17B5  |
| A18B6  | -0.20912 | 2.34512 | A11 | A17B6  |
| A18B7  | -0.26882 | 2.44049 | A11 | A17B7  |
| A18B8  | 0.21182  | 2.70465 | A11 | A17B8  |
| A18B9  | -0.27405 | 2.22373 | A11 | A17B9  |
| A18B10 | 0.09891  | 2.3734  | A11 | A17B10 |
| A18B11 | -0.99199 | 1.95391 | A11 | A17B11 |
| A18B12 | 0.32352  | 2.45094 | A11 | A17B12 |
| A18B13 | -0.60287 | 1.76588 | A11 | A17B13 |
| A18B14 | 0.2203   | 2.32952 | A11 | A17B14 |
| A18B15 | -0.32403 | 2.05869 | A11 | A17B15 |
| A19B0  | -0.29326 | 2.05289 | A11 | A18    |
| A19B1  | -0.07972 | 2.32879 | A11 | A18B1  |
| A19B2  | -0.79142 | 1.89253 | A11 | A18B2  |
| A19B3  | 0.74647  | 2.67646 | A11 | A18B3  |
| A19B4  | -0.34392 | 1.89582 | A11 | A18B4  |
| A19B5  | -0.12817 | 2.04595 | A11 | A18B5  |

|         |          |         |     |        |
|---------|----------|---------|-----|--------|
| A19B6   | -0.78869 | 2.04418 | A11 | A18B6  |
| A19B7   | 0.20053  | 2.54931 | A11 | A18B7  |
| A19B8   | -0.25052 | 2.35932 | A11 | A18B8  |
| A19B9   | 0.13213  | 2.49778 | A11 | A18B9  |
| A19B10  | -0.63263 | 2.27449 | A11 | A18B10 |
| A19B11  | 1.25727  | 2.9459  | A11 | A18B11 |
| A19B12  | -0.9188  | 2.03617 | A11 | A18B12 |
| A19B13  | 0.14328  | 2.36875 | A11 | A18B13 |
| A19B14  | -0.43731 | 2.10922 | A11 | A18B14 |
| A19B15  | 0.38196  | 2.38272 | A11 | A18B15 |
| A110B0  | 0.08874  | 2.34614 | A11 | A19    |
| A110B1  | -0.59774 | 2.25604 | A11 | A19B1  |
| A110B2  | 0.66712  | 2.68395 | A11 | A19B2  |
| A110B3  | -1.17746 | 1.73464 | A11 | A19B3  |
| A110B4  | 0.12439  | 2.23974 | A11 | A19B4  |
| A110B5  | -0.65999 | 2.17412 | A11 | A19B5  |
| A110B6  | 0.42682  | 2.83287 | A11 | A19B6  |
| A110B7  | -0.31887 | 2.34878 | A11 | A19B7  |
| A110B8  | 0.36538  | 2.60985 | A11 | A19B8  |
| A110B9  | -0.60462 | 2.27322 | A11 | A19B9  |
| A110B10 | 0.66956  | 2.67334 | A11 | A19B10 |
| A110B11 | -0.75574 | 1.68864 | A11 | A19B11 |
| A110B12 | 0.40631  | 2.54905 | A11 | A19B12 |
| A110B13 | -0.78359 | 2.08435 | A11 | A19B13 |
| A110B14 | 0.6445   | 2.54653 | A11 | A19B14 |

|         |          |         |     |         |
|---------|----------|---------|-----|---------|
| A110B15 | -0.7216  | 2.00075 | A11 | A19B15  |
| A111B0  | -0.26842 | 2.2574  | A11 | A110    |
| A111B1  | -0.26947 | 2.54103 | A11 | A110B1  |
| A111B2  | -1.23505 | 2.01683 | A11 | A110B2  |
| A111B3  | 0.74881  | 2.91209 | A11 | A110B3  |
| A111B4  | -0.45165 | 2.11535 | A11 | A110B4  |
| A111B5  | -0.39331 | 2.30154 | A11 | A110B5  |
| A111B6  | -0.25043 | 2.22105 | A11 | A110B6  |
| A111B7  | 0.27528  | 2.58798 | A11 | A110B7  |
| A111B8  | -0.60689 | 2.24446 | A11 | A110B8  |
| A111B9  | 0.48868  | 2.68554 | A11 | A110B9  |
| A111B10 | -0.41798 | 2.00378 | A11 | A110B10 |
| A111B11 | 0.30285  | 2.44437 | A11 | A110B11 |
| A111B12 | -0.57944 | 1.81233 | A11 | A110B12 |
| A111B13 | -0.17691 | 2.16605 | A11 | A110B13 |
| A111B14 | -0.86607 | 1.90203 | A11 | A110B14 |
| A111B15 | -0.09712 | 2.72236 | A11 | A110B15 |
| A112B0  | -0.0928  | 2.52582 | A11 | A111    |
| A112B1  | 0.0534   | 2.8105  | A11 | A111B1  |
| A112B2  | 1.00911  | 3.25188 | A11 | A111B2  |
| A112B3  | -0.50827 | 2.16328 | A11 | A111B3  |
| A112B4  | 0.10833  | 2.567   | A11 | A111B4  |
| A112B5  | -0.51798 | 2.4569  | A11 | A111B5  |
| A112B6  | -0.09799 | 2.47147 | A11 | A111B6  |
| A112B7  | -0.55836 | 2.3127  | A11 | A111B7  |

|         |          |         |     |         |
|---------|----------|---------|-----|---------|
| A112B8  | 0.88961  | 2.85135 | A11 | A111B8  |
| A112B9  | -0.36115 | 2.19686 | A11 | A111B9  |
| A112B10 | -0.04147 | 2.42176 | A11 | A111B10 |
| A112B11 | 0.12982  | 2.14153 | A11 | A111B11 |
| A112B12 | -0.41516 | 2.32439 | A11 | A111B12 |
| A112B13 | -0.57242 | 2.34296 | A11 | A111B13 |
| A112B14 | 0.06677  | 2.7681  | A11 | A111B14 |
| A112B15 | 0.7115   | 2.81947 | A11 | A111B15 |
| A113B0  | 0.09885  | 2.61863 | A11 | A112    |
| A113B1  | 1.04108  | 2.72384 | A11 | A112B1  |
| A113B2  | -0.56377 | 1.84137 | A11 | A112B2  |
| A113B3  | 0.334    | 2.43102 | A11 | A112B3  |
| A113B4  | -0.74522 | 2.16374 | A11 | A112B4  |
| A113B5  | 0.24884  | 2.75002 | A11 | A112B5  |
| A113B6  | -0.3294  | 2.56946 | A11 | A112B6  |
| A113B7  | 0.97939  | 2.87105 | A11 | A112B7  |
| A113B8  | -0.66961 | 1.88741 | A11 | A112B8  |
| A113B9  | 0.04501  | 2.46299 | A11 | A112B9  |
| A113B10 | 0.11241  | 2.46323 | A11 | A112B10 |
| A113B11 | -0.71363 | 2.01171 | A11 | A112B11 |
| A113B12 | 0.08656  | 2.42323 | A11 | A112B12 |
| A113B13 | 0.00509  | 2.33305 | A11 | A112B13 |
| A113B14 | -1.56766 | 1.43856 | A11 | A112B14 |
| A113B15 | -0.56711 | 1.53774 | A11 | A112B15 |
| A114B0  | 0.45787  | 2.51978 | A11 | A113    |

|         |          |         |     |         |
|---------|----------|---------|-----|---------|
| A114B1  | -0.67185 | 1.64784 | A11 | A113B1  |
| A114B2  | 0.24921  | 2.40513 | A11 | A113B2  |
| A114B3  | -0.70014 | 2.09701 | A11 | A113B3  |
| A114B4  | 0.11659  | 2.57091 | A11 | A113B4  |
| A114B5  | -0.46089 | 2.18298 | A11 | A113B5  |
| A114B6  | 0.52975  | 2.50479 | A11 | A113B6  |
| A114B7  | -0.25749 | 1.84822 | A11 | A113B7  |
| A114B8  | -0.52854 | 2.20363 | A11 | A113B8  |
| A114B9  | 0.24685  | 2.41797 | A11 | A113B9  |
| A114B10 | 0.44922  | 2.35082 | A11 | A113B10 |
| A114B11 | -0.50902 | 2.42115 | A11 | A113B11 |
| A114B12 | -0.13891 | 2.28687 | A11 | A113B12 |
| A114B13 | -0.50384 | 2.32795 | A11 | A113B13 |
| A114B14 | 0.65275  | 3.00622 | A11 | A113B14 |
| A114B15 | -0.4912  | 2.10485 | A11 | A113B15 |
| A115B0  | -0.31112 | 2.06192 | A11 | A114    |
| A115B1  | -0.1666  | 2.31969 | A11 | A114B1  |
| A115B2  | -0.5301  | 2.15593 | A11 | A114B2  |
| A115B3  | 0.79895  | 2.79716 | A11 | A114B3  |
| A115B4  | -0.81389 | 2.01186 | A11 | A114B4  |
| A115B5  | -0.13369 | 2.15705 | A11 | A114B5  |
| A115B6  | -0.31543 | 1.97504 | A11 | A114B6  |
| A115B7  | 0.01893  | 2.10571 | A11 | A114B7  |
| A115B8  | -0.43568 | 2.18485 | A11 | A114B8  |
| A115B9  | 0.00836  | 2.17112 | A11 | A114B9  |

|         |          |         |     |         |
|---------|----------|---------|-----|---------|
| Al15B10 | -0.71706 | 1.72635 | Al1 | Al14B10 |
| Al15B11 | 0.23455  | 2.44786 | Al1 | Al14B11 |
| Al15B12 | -0.51688 | 2.42579 | Al1 | Al14B12 |
| Al15B13 | 0.80708  | 2.83179 | Al1 | Al14B13 |
| Al15B14 | -0.49897 | 2.02541 | Al1 | Al14B14 |
| Al15B15 | 0.20716  | 2.37075 | Al1 | Al14B15 |

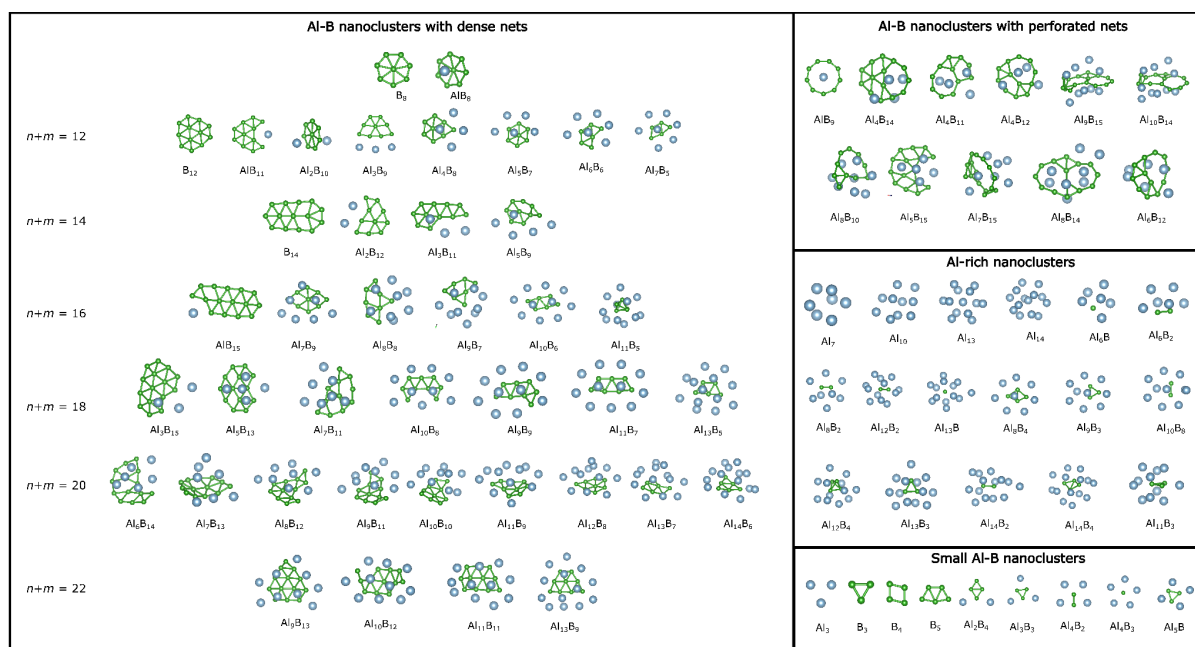

Figure S1.  $Al_nB_m$  molecules with  $\Delta^2_{\min} > 0$  classified by their structural topology. Blue spheres are aluminum atoms and green ones are boron atoms, respectively.

## Section 2. Ground-state structures of $Al_nB_m$

Atomic coordinates of all calculated ground-state structures of  $Al_nB_m$  molecules ( $0 \leq n, m \leq 16$ ) in the XYZ format.

```
10
energy
Al 0.6718930000 -0.0482290000 1.4460520000
Al -0.4595880000 -2.4254550000 -0.0002120000
Al 2.0750280000 -2.1050600000 0.0012610000
Al -1.7906890000 -0.5735070000 -1.5060390000
Al -1.7889920000 -0.5705540000 1.5078510000
Al -3.2142100000 0.9101100000 0.0006230000
Al 2.8755410000 0.3349810000 -0.0016420000
Al 0.6707170000 -0.0493990000 -1.4459850000
Al -0.7538180000 1.8342360000 -0.0025220000
Al 1.7141190000 2.6928770000 0.0006120000
11
energy
Al -2.7722670000 1.4824700000 0.0004750000
Al -0.2941580000 2.5012830000 -0.0005330000
Al -0.9864760000 -0.0075480000 1.3924500000
Al -0.9866620000 -0.0072190000 -1.3917640000
Al 2.2787710000 1.8465130000 -0.0009140000
Al 1.4058080000 -1.0070170000 1.4195580000
Al -0.5743980000 -2.3744630000 -0.0002140000
Al 3.5602700000 -0.4813060000 0.0000970000
Al 1.4055970000 -1.0089570000 -1.4186110000
Al -3.2678460000 -1.1305370000 -0.0004870000
B 0.6015400000 0.4856340000 -0.0001490000
20
energy
Al -2.0088330000 -0.8949740000 1.2087330000
Al 0.2384520000 -2.4383140000 0.3898880000
Al 0.4941670000 0.5282080000 1.1150740000
Al 2.7278380000 -1.5935800000 -1.2808050000
Al 0.0328710000 -1.5074910000 2.8368050000
Al 0.0865480000 3.2991400000 -0.2758870000
Al -1.9046210000 1.8317920000 0.3191870000
Al 2.4534080000 2.3543660000 0.2308310000
Al 3.8314190000 -0.0972250000 0.7097550000
Al -4.1522900000 0.7509500000 -0.1764230000
B -3.2414830000 -0.9869900000 -0.6505350000
B -2.0463650000 0.0419120000 -1.2220470000
B 0.8948270000 -0.2134050000 -1.5614820000
B 0.8654630000 1.4469230000 -1.1129900000
B -0.5992540000 0.7398440000 -1.3918760000
B 0.7117640000 -1.9471750000 -1.8193200000
B -0.6637800000 -0.9243760000 -1.6941110000
B -2.0797260000 -1.9085410000 -1.2016660000
B -0.7257730000 -2.5845820000 -1.6653490000
B 2.2070320000 0.5309230000 -0.8812330000
21
energy
Al 0.2672580000 2.0836920000 -0.4017760000
Al 1.3240670000 -0.3700780000 -1.5964220000
Al -1.3076730000 -0.0489660000 -1.4823720000
Al 3.2098530000 1.3971000000 -0.1956820000
Al 2.8494080000 -1.2986250000 0.7300280000
Al 0.2149810000 -2.1299120000 0.1660980000
Al -2.5732960000 -2.7443690000 -0.5920480000
Al 4.0337640000 -0.6604820000 -1.6583400000
Al -3.9101210000 0.2821900000 -0.9106520000
Al -2.3661020000 2.6717380000 -0.5784780000
B 1.6015570000 0.5829960000 1.6548620000
B -1.0821090000 1.4665930000 1.5329380000
B 0.4561550000 1.8940110000 1.8382120000
```

|   |              |              |             |
|---|--------------|--------------|-------------|
| B | 0.039040000  | 0.268284000  | 2.224777000 |
| B | 1.167503000  | -0.994031000 | 1.995494000 |
| B | -0.414533000 | -1.365725000 | 2.256076000 |
| B | -2.606556000 | -0.746991000 | 0.523500000 |
| B | -1.655435000 | -1.839054000 | 1.348423000 |
| B | -1.504657000 | -0.179302000 | 1.683228000 |
| B | -2.393436000 | 0.908762000  | 0.758444000 |
| B | 1.862909000  | 2.130513000  | 1.135126000 |

22

energy

|    |              |              |              |
|----|--------------|--------------|--------------|
| Al | -0.700319000 | 2.326827000  | -0.543121000 |
| Al | -1.276214000 | -0.474516000 | -1.568503000 |
| Al | 1.190177000  | 0.327039000  | -1.397957000 |
| Al | -3.301505000 | 1.737635000  | -0.967242000 |
| Al | -2.365170000 | -2.101994000 | 0.800234000  |
| Al | 0.242714000  | -2.114860000 | 0.072026000  |
| Al | 2.670516000  | -2.053206000 | -0.724727000 |
| Al | -3.832624000 | -0.998188000 | -1.248191000 |
| Al | 1.774923000  | 2.540243000  | 0.582378000  |
| Al | 4.247283000  | -0.071939000 | -1.473591000 |
| B  | -1.513290000 | -0.054501000 | 1.599014000  |
| B  | -2.056680000 | 1.442777000  | 1.020429000  |
| B  | -2.603576000 | 0.100941000  | 0.315019000  |
| B  | 0.789802000  | 1.589739000  | 2.249111000  |
| B  | -0.769307000 | 1.538482000  | 1.975280000  |
| B  | 0.032358000  | 0.098236000  | 2.374526000  |
| B  | 2.924692000  | 1.279302000  | -0.610605000 |
| B  | 0.884090000  | -1.343837000 | 2.179017000  |
| B  | 2.639780000  | 0.081501000  | 0.452151000  |
| B  | 2.225094000  | -1.228934000 | 1.291161000  |
| B  | 1.654899000  | 0.234457000  | 1.893174000  |
| B  | -0.697293000 | -1.442470000 | 2.080328000  |

23

energy

|    |              |              |              |
|----|--------------|--------------|--------------|
| Al | -2.161103000 | -0.210700000 | 1.180305000  |
| Al | 0.117534000  | -1.610009000 | 1.432862000  |
| Al | 2.143819000  | 0.183570000  | 1.467107000  |
| Al | 0.966373000  | 2.485790000  | 0.565847000  |
| Al | -1.529731000 | 2.697384000  | 0.113003000  |
| Al | -3.815189000 | 1.600042000  | -0.084719000 |
| Al | 3.327102000  | 2.013363000  | -0.375779000 |
| Al | -4.940101000 | -0.829589000 | 0.163422000  |
| Al | 3.142814000  | -1.993339000 | -0.102804000 |
| Al | 4.875586000  | -0.090418000 | -0.152085000 |
| B  | 1.149868000  | -2.694934000 | -0.480385000 |
| B  | -0.284524000 | -3.220309000 | -0.091016000 |
| B  | -1.728677000 | -2.623708000 | -0.325206000 |
| B  | -3.037950000 | -0.138150000 | -1.113197000 |
| B  | -3.035248000 | -1.661182000 | -0.477033000 |
| B  | -1.630520000 | -0.994641000 | -1.203817000 |
| B  | -0.172544000 | -1.799377000 | -1.084864000 |
| B  | 1.297446000  | -0.966745000 | -0.857906000 |
| B  | 2.667811000  | -0.002768000 | -0.939376000 |
| B  | -0.180037000 | 1.516925000  | -1.285297000 |
| B  | -1.636978000 | 0.796393000  | -1.191317000 |
| B  | -0.202305000 | -0.100481000 | -0.771139000 |
| B  | 1.263190000  | 0.849133000  | -1.118063000 |

24

energy

|    |              |              |              |
|----|--------------|--------------|--------------|
| Al | 2.391711000  | -1.611111000 | -2.049473000 |
| Al | -0.319462000 | -1.482481000 | -1.922031000 |
| Al | 2.048255000  | -1.877729000 | 0.603575000  |
| Al | 2.510744000  | 2.647829000  | -0.335100000 |
| Al | 1.652330000  | 0.839765000  | 1.900486000  |
| Al | -1.748514000 | -1.422889000 | 1.680614000  |
| Al | -0.153409000 | 2.243304000  | -0.176640000 |
| Al | -2.645278000 | 2.242887000  | 0.692436000  |

|    |               |               |               |
|----|---------------|---------------|---------------|
| Al | -2.8644830000 | -1.8550940000 | -0.9230680000 |
| Al | -3.8482560000 | -0.0845420000 | 1.1692040000  |
| B  | 2.4982480000  | 0.6616570000  | -1.6941570000 |
| B  | 3.1345360000  | 0.3362960000  | -0.2805430000 |
| B  | 1.3457530000  | 0.2441400000  | -0.4272710000 |
| B  | 3.1367860000  | -0.9100670000 | 2.3971230000  |
| B  | -1.9306750000 | -0.1085870000 | -1.8919290000 |
| B  | 0.9642540000  | 0.9482470000  | -1.9646050000 |
| B  | -0.6496880000 | 0.9188840000  | -2.1369210000 |
| B  | 0.0819090000  | -0.3441220000 | 0.5545460000  |
| B  | 0.2768080000  | -1.2205560000 | 2.0337540000  |
| B  | 1.6863390000  | -1.3131230000 | 2.7315680000  |
| B  | -1.9410750000 | 1.5058130000  | -1.2902090000 |
| B  | -3.0442380000 | 0.3963150000  | -0.7216190000 |
| B  | -1.4560110000 | 0.0518050000  | -0.0955720000 |
| B  | 3.6355960000  | -0.2305460000 | 1.1218210000  |

25

energy

|    |               |               |               |
|----|---------------|---------------|---------------|
| Al | -2.5983350000 | 0.5454630000  | 1.4396090000  |
| Al | -0.7002150000 | 2.3818410000  | 0.9773710000  |
| Al | 1.8064620000  | 1.7922220000  | 1.3081000000  |
| Al | 0.0870340000  | -0.3936710000 | 0.8036870000  |
| Al | -0.6487680000 | -2.9500110000 | 0.0516780000  |
| Al | -3.0362710000 | -2.0994530000 | 0.3941670000  |
| Al | 3.0252600000  | -0.4868120000 | 1.7018970000  |
| Al | 1.8113560000  | -2.4437790000 | -0.0690320000 |
| Al | -4.9110470000 | -0.1593410000 | 0.1123560000  |
| Al | 4.1195270000  | -1.4352760000 | -0.8231660000 |
| B  | 2.2578130000  | 2.4088990000  | -0.8188020000 |
| B  | 0.7297110000  | 2.8740180000  | -1.1144770000 |
| B  | -2.0794460000 | 2.2744630000  | -1.0623860000 |
| B  | -2.8815900000 | -0.4850810000 | -0.9822330000 |
| B  | -3.2001490000 | 1.1058960000  | -0.8129280000 |
| B  | -1.6906030000 | 0.5809810000  | -1.3168870000 |
| B  | -0.4339820000 | 1.6848110000  | -1.6361400000 |
| B  | 2.7279230000  | 0.5496170000  | -0.8364270000 |
| B  | 0.2918170000  | -1.4852190000 | -1.4170710000 |
| B  | -1.2951840000 | -1.0991300000 | -1.1967060000 |
| B  | -0.1051670000 | 0.0922590000  | -1.6992480000 |
| B  | 1.4514540000  | -0.3857970000 | -1.1999340000 |
| B  | 3.5707080000  | 1.8805940000  | -0.1906730000 |
| B  | 4.1606930000  | 0.4255880000  | 0.0438860000  |
| B  | -0.7870030000 | 3.2250270000  | -1.0913080000 |

26

energy

|    |               |               |               |
|----|---------------|---------------|---------------|
| Al | -1.9972500000 | 0.8294850000  | -1.3450920000 |
| Al | 0.0137890000  | -1.2511620000 | -2.0932360000 |
| Al | -1.9249550000 | -0.0709350000 | 2.0867380000  |
| Al | -0.0895980000 | -2.1324950000 | 1.3588440000  |
| Al | -3.1902800000 | -2.5721160000 | -0.5126380000 |
| Al | -0.7920140000 | 3.1363350000  | -1.4373990000 |
| Al | 1.3883740000  | 1.5890950000  | -1.1918790000 |
| Al | 1.2509990000  | 0.9352050000  | 1.9441030000  |
| Al | 2.8376760000  | -0.6525990000 | -2.1897880000 |
| Al | 2.3433400000  | -1.5119840000 | 2.1346000000  |
| B  | 1.7828560000  | -2.2809130000 | -0.4872890000 |
| B  | -3.3105110000 | 0.9120360000  | 0.5224070000  |
| B  | -1.1142110000 | -2.7440600000 | -0.6253600000 |
| B  | -1.5415410000 | -1.1036750000 | -0.1665360000 |
| B  | 0.4138370000  | -3.0354590000 | -0.6773110000 |
| B  | -3.1723510000 | -0.5657760000 | 0.0283760000  |
| B  | -2.4482460000 | 2.1969180000  | 0.7841430000  |
| B  | -0.2390410000 | 0.0803890000  | 0.1093820000  |
| B  | -1.3068310000 | 3.2741110000  | 0.8335790000  |
| B  | 2.8261700000  | 1.7575030000  | 0.5209470000  |
| B  | -0.7573010000 | 1.6060410000  | 0.6697180000  |
| B  | 1.7597600000  | 2.8191300000  | 0.7839220000  |

|   |              |               |               |
|---|--------------|---------------|---------------|
| B | 2.9841740000 | -1.3511590000 | -0.0213190000 |
| B | 2.9807540000 | 0.2301700000  | 0.1425820000  |
| B | 1.3238310000 | -0.5913600000 | -0.0735710000 |
| B | 0.2344420000 | 3.2191480000  | 0.8952750000  |

12

energy

|    |               |               |               |
|----|---------------|---------------|---------------|
| Al | 1.8199660000  | 0.0003720000  | 1.3227770000  |
| Al | 2.5862170000  | -1.2854110000 | -1.0003640000 |
| Al | 2.5877370000  | 1.2857200000  | -0.9984590000 |
| Al | 0.7853260000  | 2.4850240000  | 0.5049360000  |
| Al | -0.0095460000 | 0.0011530000  | -0.8635640000 |
| Al | -1.6735710000 | 2.1138710000  | -0.1894580000 |
| Al | -2.9320770000 | -0.0006300000 | -1.5040140000 |
| Al | -1.6714250000 | -2.1144570000 | -0.1903160000 |
| Al | 0.7867670000  | -2.4848140000 | 0.5063550000  |
| Al | -2.1512490000 | -0.0008820000 | 1.3518160000  |
| B  | -0.1668800000 | 0.8127190000  | 1.3784240000  |
| B  | -0.1662930000 | -0.8125780000 | 1.3783320000  |

13

energy

|    |               |               |               |
|----|---------------|---------------|---------------|
| Al | -0.0130280000 | 2.0739330000  | -1.8508030000 |
| Al | 0.0119610000  | -1.9401880000 | 1.2929870000  |
| Al | -2.0426160000 | 1.2745740000  | -0.4167890000 |
| Al | -0.0117100000 | 1.9617670000  | 1.2612600000  |
| Al | -1.7223430000 | 0.0060100000  | 2.0700290000  |
| Al | -2.0261540000 | -1.3080640000 | -0.3984340000 |
| Al | 1.7227770000  | 0.0268020000  | 2.0695290000  |
| Al | 2.0418290000  | -1.2831810000 | -0.3990010000 |
| Al | 2.0268230000  | 1.2994850000  | -0.4173920000 |
| Al | 0.0126110000  | -2.1007640000 | -1.8224320000 |
| B  | -0.8214100000 | -0.0175730000 | -1.7390900000 |
| B  | 0.8210440000  | -0.0074340000 | -1.7393050000 |
| B  | -0.0000270000 | -0.0019630000 | -0.1328880000 |

14

energy

|    |               |               |               |
|----|---------------|---------------|---------------|
| Al | -3.3107570000 | -0.0003910000 | -0.8695140000 |
| Al | -1.2525880000 | 1.9676960000  | -0.5566820000 |
| Al | 2.4088120000  | 0.0004420000  | -1.7025080000 |
| Al | -1.2520360000 | -1.9676470000 | -0.5558060000 |
| Al | 1.4095640000  | -2.1256570000 | -0.4228520000 |
| Al | 2.0956670000  | -0.0002900000 | 1.2663240000  |
| Al | 1.4089910000  | 2.1260040000  | -0.4222270000 |
| Al | 0.1526230000  | -1.8686380000 | 1.9066830000  |
| Al | -1.7174870000 | 0.0003470000  | 1.4106410000  |
| Al | 0.1530160000  | 1.8682890000  | 1.9073960000  |
| B  | 0.3192250000  | 0.8306910000  | -1.7557770000 |
| B  | -1.1373290000 | -0.0001940000 | -1.4806250000 |
| B  | 0.3193040000  | -0.8307150000 | -1.7559570000 |
| B  | 0.2497070000  | -0.0001880000 | -0.1074240000 |

15

energy

|    |               |               |               |
|----|---------------|---------------|---------------|
| Al | -3.5685780000 | -0.0058690000 | -0.9974490000 |
| Al | -1.3303830000 | -2.0288340000 | -0.4725640000 |
| Al | 1.3265700000  | -2.0297960000 | -0.4713790000 |
| Al | 2.2251240000  | 0.0013000000  | 1.2558120000  |
| Al | -0.0008400000 | -1.4157130000 | 1.9604660000  |
| Al | -0.0001100000 | 1.4308000000  | 1.9497030000  |
| Al | 1.3307630000  | 2.0259800000  | -0.4811110000 |
| Al | -2.2240800000 | 0.0034440000  | 1.2558770000  |
| Al | -1.3280590000 | 2.0293590000  | -0.4825060000 |
| Al | 3.5707280000  | -0.0066990000 | -0.9977340000 |
| B  | -0.0000730000 | -0.8541960000 | -1.7544780000 |
| B  | -1.4273090000 | -0.0016810000 | -1.4751170000 |
| B  | 1.4279980000  | -0.0035950000 | -1.4738020000 |
| B  | -0.0044620000 | 0.0007650000  | -0.0880780000 |
| B  | 0.0008910000  | 0.8483780000  | -1.7582280000 |

16

energy

|    |               |               |               |
|----|---------------|---------------|---------------|
| Al | 0.4323940000  | 2.4964120000  | 0.2734770000  |
| Al | -1.3971080000 | -0.2006300000 | 1.3495190000  |
| Al | 3.0223010000  | 1.7774010000  | -0.6930360000 |
| Al | 1.3972550000  | 0.1999950000  | 1.3482570000  |
| Al | -2.1619230000 | 2.1611720000  | 0.0873670000  |
| Al | -4.1026510000 | 0.5091330000  | 0.2289880000  |
| Al | -0.4302800000 | -2.4970670000 | 0.2756170000  |
| Al | -3.0239080000 | -1.7767860000 | -0.6921830000 |
| Al | 4.1013330000  | -0.5071600000 | 0.2327930000  |
| Al | 2.1631640000  | -2.1615990000 | 0.0823470000  |
| B  | 1.0664740000  | 0.9254260000  | -1.1933300000 |
| B  | -0.5420770000 | 0.6728490000  | -1.1001190000 |
| B  | -2.1547000000 | 0.2537320000  | -0.9500310000 |
| B  | -1.0673220000 | -0.9265740000 | -1.1899460000 |
| B  | 0.5415940000  | -0.6739060000 | -1.0975350000 |
| B  | 2.1545310000  | -0.2537910000 | -0.9512180000 |

17  
energy

|    |               |               |               |
|----|---------------|---------------|---------------|
| Al | 1.2661970000  | -0.4691280000 | 1.3748180000  |
| Al | -1.2793040000 | -1.8248730000 | 2.4336020000  |
| Al | 2.9567080000  | -1.5361150000 | -0.5121160000 |
| Al | -2.5181510000 | -1.1354340000 | 0.0073730000  |
| Al | -0.0274000000 | -2.4542480000 | 0.1176530000  |
| Al | -2.2583910000 | 1.7737150000  | -0.8761990000 |
| Al | -1.0220370000 | 0.7657140000  | 1.3622600000  |
| Al | 1.3983330000  | 2.1806890000  | 1.3337260000  |
| Al | -0.3187880000 | 3.1812720000  | -0.1663140000 |
| Al | 2.6464300000  | 1.1321210000  | -0.7482430000 |
| B  | -1.5622160000 | -1.1521030000 | -2.3514440000 |
| B  | -0.1107810000 | -1.7079500000 | -2.1362750000 |
| B  | 0.9151920000  | -0.4456220000 | -1.1753100000 |
| B  | 0.3612790000  | 0.9885330000  | -0.5748930000 |
| B  | -0.7169130000 | 0.1108540000  | -1.5027850000 |
| B  | -2.3909190000 | 0.0561420000  | -1.9163150000 |
| B  | 1.3110050000  | -2.0455080000 | -1.5920350000 |

18  
energy

|    |               |               |               |
|----|---------------|---------------|---------------|
| Al | 0.9297530000  | 2.6071960000  | -0.2127860000 |
| Al | 1.2693230000  | 0.0123560000  | -1.1654280000 |
| Al | 2.4849480000  | -2.3173480000 | 0.2622540000  |
| Al | 3.2635600000  | 1.6955500000  | 0.2506150000  |
| Al | 3.9780080000  | -0.6161590000 | -0.9929150000 |
| Al | -1.7070160000 | 2.5799890000  | 0.0545510000  |
| Al | -1.4725990000 | -0.1458600000 | -1.1585540000 |
| Al | -3.7892980000 | -1.7856530000 | -0.7876710000 |
| Al | -0.0136390000 | -2.6182260000 | 0.5913000000  |
| Al | -3.7843610000 | 1.0664520000  | -0.1163100000 |
| B  | -0.2081810000 | 0.8918120000  | 1.3137840000  |
| B  | 0.7791150000  | -0.5668350000 | 1.3171180000  |
| B  | 2.3360040000  | -0.2769490000 | 0.8528830000  |
| B  | 1.3915290000  | 0.9947160000  | 1.1958150000  |
| B  | -1.9149650000 | -1.9026340000 | 0.4421460000  |
| B  | -2.6205140000 | -0.5292070000 | 0.9051220000  |
| B  | -0.9743680000 | -0.6818300000 | 1.2368200000  |
| B  | -1.8011860000 | 0.8273580000  | 1.2511670000  |

19  
energy

|    |               |               |               |
|----|---------------|---------------|---------------|
| Al | 3.9265510000  | -0.0202950000 | -0.0328920000 |
| Al | 2.5641900000  | -2.3050860000 | -0.6260420000 |
| Al | -0.0966090000 | -2.3093720000 | -0.8558190000 |
| Al | -1.3682860000 | 0.0348200000  | -1.4182700000 |
| Al | 1.3813370000  | 0.3037660000  | -1.1981770000 |
| Al | -0.1921140000 | 2.5060160000  | -0.4708680000 |
| Al | -2.6727990000 | -1.9107220000 | 0.5535640000  |
| Al | -3.9501370000 | 0.0259810000  | -0.5829190000 |
| Al | -2.7261500000 | 2.2183240000  | 0.2671850000  |

|    |               |               |              |
|----|---------------|---------------|--------------|
| Al | 2.5129040000  | 2.6031860000  | 0.1152390000 |
| B  | -0.8971790000 | -0.8175740000 | 1.3217660000 |
| B  | 2.1123580000  | 0.6094370000  | 1.0644420000 |
| B  | 1.9941520000  | -1.0568380000 | 1.1069450000 |
| B  | 0.6915330000  | -0.0901970000 | 1.4882960000 |
| B  | 0.8048250000  | 1.5752850000  | 1.2164250000 |
| B  | -0.7129530000 | 0.8985760000  | 1.2663770000 |
| B  | -2.1171110000 | 0.2461790000  | 0.8753780000 |
| B  | 0.5732040000  | -1.8460880000 | 1.4597160000 |
| B  | -0.8339350000 | -2.4999840000 | 1.2480570000 |

11

energy

|    |               |               |               |
|----|---------------|---------------|---------------|
| Al | 0.0008310000  | -1.3307900000 | 1.3558380000  |
| Al | -0.0000860000 | 1.3307060000  | 1.3578890000  |
| Al | -0.0009450000 | 2.8558400000  | -1.0601310000 |
| Al | -2.4156590000 | -0.0001920000 | 1.4865600000  |
| Al | -2.2275850000 | 1.5570020000  | -0.6250940000 |
| Al | 2.2272340000  | -1.5588690000 | -0.6236970000 |
| Al | 0.0001480000  | 0.0004490000  | -1.0666480000 |
| Al | 2.4161060000  | 0.0011020000  | 1.4854160000  |
| Al | -2.2269720000 | -1.5580860000 | -0.6242810000 |
| Al | 2.2269860000  | 1.5586670000  | -0.6256900000 |
| Al | -0.0000580000 | -2.8558300000 | -1.0601630000 |

12

energy

|    |               |               |               |
|----|---------------|---------------|---------------|
| Al | -2.7884710000 | -0.4103840000 | -1.4279660000 |
| Al | -1.3500610000 | -2.3309980000 | -0.3788890000 |
| Al | -0.0003610000 | 0.0910570000  | -0.6849480000 |
| Al | -2.0009160000 | 0.1397110000  | 1.2723220000  |
| Al | -2.0883090000 | 1.9677170000  | -0.7697960000 |
| Al | 2.7886830000  | -0.4093940000 | -1.4286500000 |
| Al | 2.0875960000  | 1.9681870000  | -0.7687430000 |
| Al | -0.0003410000 | 2.5035970000  | 0.8689860000  |
| Al | 1.3509600000  | -2.3296360000 | -0.3783830000 |
| Al | -0.0000940000 | -1.5482070000 | 1.7739650000  |
| Al | 2.0012060000  | 0.1390310000  | 1.2717160000  |
| B  | 0.0002820000  | 0.5702270000  | 1.6910020000  |

21

energy

|    |               |               |               |
|----|---------------|---------------|---------------|
| Al | 2.0450400000  | -2.6919180000 | 0.6746550000  |
| Al | 1.1597070000  | -0.6410630000 | -1.3829690000 |
| Al | 3.7401900000  | -1.6424630000 | -1.0156530000 |
| Al | 3.3554590000  | 0.8362460000  | -0.5856320000 |
| Al | -0.4880550000 | -2.2404230000 | 0.3450300000  |
| Al | -2.5853620000 | 2.0257840000  | 0.1254040000  |
| Al | 2.2070500000  | 3.0197180000  | 0.0707190000  |
| Al | -0.0561550000 | 2.1288180000  | -0.9078210000 |
| Al | -1.4697070000 | -0.1718590000 | -1.5137710000 |
| Al | -3.1962190000 | -2.1763360000 | -0.0177040000 |
| Al | -4.0954050000 | 0.1446350000  | -1.2059240000 |
| B  | 1.6759660000  | 0.9121270000  | 1.1148330000  |
| B  | 2.4452650000  | -0.5382610000 | 0.8426680000  |
| B  | -0.4936230000 | -0.7323030000 | 2.1032540000  |
| B  | 1.0422650000  | -0.6163000000 | 1.6351680000  |
| B  | 0.1270930000  | 0.8483580000  | 1.8846320000  |
| B  | -1.9505640000 | -1.0839100000 | 1.5793420000  |
| B  | -0.8697860000 | 2.1093290000  | 1.3993050000  |
| B  | -2.7864050000 | -0.1128520000 | 0.5894180000  |
| B  | -1.5363140000 | 0.5676850000  | 1.5489740000  |
| B  | 0.7430950000  | 2.3091620000  | 1.3779420000  |

22

energy

|    |               |               |               |
|----|---------------|---------------|---------------|
| Al | 0.3276920000  | -1.9586460000 | 0.7234240000  |
| Al | -1.1570130000 | -0.3343090000 | -1.2244450000 |
| Al | 1.4251500000  | -0.6619020000 | -1.4181970000 |
| Al | -3.6014380000 | 0.7698610000  | -0.8780090000 |
| Al | 0.5172370000  | 1.9361120000  | -0.8236740000 |

|    |               |               |               |
|----|---------------|---------------|---------------|
| Al | 3.3230950000  | 1.3696310000  | -0.4894070000 |
| Al | -3.5998590000 | -1.7338800000 | -1.3085510000 |
| Al | 4.1096240000  | -0.8636850000 | -1.9296450000 |
| Al | -2.1658450000 | -2.5881610000 | 0.6868970000  |
| Al | -1.9606790000 | 2.7340520000  | -0.6927200000 |
| Al | 3.1264570000  | -1.5966770000 | 0.6955250000  |
| B  | -2.0142810000 | 0.9854910000  | 1.0127020000  |
| B  | -2.6923210000 | -0.4749080000 | 0.7173740000  |
| B  | 0.0117560000  | -0.4859290000 | 2.4837610000  |
| B  | -1.4300040000 | -0.5167050000 | 1.7657480000  |
| B  | -0.6526120000 | 1.0287400000  | 2.0906800000  |
| B  | -1.2058880000 | 2.3914000000  | 1.2991890000  |
| B  | 0.3504070000  | 2.3639740000  | 1.6137090000  |
| B  | 2.3521700000  | 0.3715670000  | 1.1749640000  |
| B  | 1.0119310000  | 0.8023760000  | 2.0495440000  |
| B  | 1.5735460000  | -0.8008870000 | 2.0778650000  |
| B  | 1.7998010000  | 1.9466510000  | 1.0273500000  |

23

energy

|    |               |               |               |
|----|---------------|---------------|---------------|
| Al | -3.9126000000 | 0.6306390000  | -0.5796270000 |
| Al | -1.4315860000 | -0.3732060000 | -1.3125470000 |
| Al | 2.6123110000  | 2.5704060000  | 0.0854720000  |
| Al | 0.2723770000  | 3.6109390000  | 0.3857230000  |
| Al | 0.6347370000  | 1.2480290000  | -1.1148540000 |
| Al | -1.9258930000 | 2.4885040000  | -0.6365080000 |
| Al | -1.5105350000 | -2.4918310000 | 0.7857130000  |
| Al | 3.6183810000  | -2.5707200000 | -0.8195030000 |
| Al | 3.2467360000  | 0.2489510000  | -0.9670550000 |
| Al | 1.0092620000  | -1.5718700000 | -1.3120540000 |
| Al | -3.7260860000 | -2.0647680000 | -0.6709970000 |
| B  | -2.1274220000 | 0.9146430000  | 0.9350660000  |
| B  | -2.5704190000 | -0.6253080000 | 0.7279610000  |
| B  | 0.9538130000  | 1.7232560000  | 1.4650610000  |
| B  | -0.6467980000 | 1.4428850000  | 1.3089160000  |
| B  | -0.1335950000 | -1.2720040000 | 2.3328130000  |
| B  | -1.2443670000 | -0.2395970000 | 1.7132240000  |
| B  | 0.4225870000  | 0.2704270000  | 2.0765950000  |
| B  | 0.4826780000  | -2.5904130000 | 1.4882590000  |
| B  | 1.2955970000  | -1.1212930000 | 1.5562510000  |
| B  | 2.6390810000  | -0.9697270000 | 0.6446520000  |
| B  | 1.9095750000  | 0.4428450000  | 1.0495960000  |
| B  | 1.9128020000  | -2.4609050000 | 0.7078230000  |

24

energy

|    |               |               |               |
|----|---------------|---------------|---------------|
| Al | 2.8303540000  | 0.2662480000  | -1.6997610000 |
| Al | 0.1795530000  | 0.6533380000  | -2.2271310000 |
| Al | -0.8042380000 | -1.9881660000 | -1.9103600000 |
| Al | -1.7388320000 | -0.1717740000 | 2.1728780000  |
| Al | -0.2777010000 | 2.3311500000  | 1.7263010000  |
| Al | -2.9561640000 | -1.5964740000 | 0.0369530000  |
| Al | -0.2503000000 | 3.2570490000  | -0.8509080000 |
| Al | -2.4095550000 | 0.1929040000  | -1.9380980000 |
| Al | -0.5701380000 | -2.2848040000 | 0.9244080000  |
| Al | 2.9478520000  | -0.6813770000 | 0.7026880000  |
| Al | -2.3331750000 | 1.4633320000  | 0.2608490000  |
| B  | 1.5541790000  | 1.9283480000  | -1.1415340000 |
| B  | 1.0090400000  | 0.7062310000  | 0.0068020000  |
| B  | 1.6005310000  | 2.2569050000  | 0.4568100000  |
| B  | 1.6684910000  | -0.3532320000 | 2.4491610000  |
| B  | 0.8167130000  | -0.8856700000 | -0.4188720000 |
| B  | 1.3856730000  | -1.8767290000 | 1.8872310000  |
| B  | 1.6723750000  | 1.1397940000  | 1.6462930000  |
| B  | 0.2072130000  | -1.0617940000 | 2.7383160000  |
| B  | 0.3770150000  | 0.5742120000  | 2.7175410000  |
| B  | -0.7514390000 | -0.1646670000 | -0.1197500000 |
| B  | 1.6236770000  | -2.2972720000 | -1.1354740000 |
| B  | 1.5718100000  | -2.4759710000 | 0.4185200000  |

|        |               |               |               |
|--------|---------------|---------------|---------------|
| B      | 1.2588150000  | -1.2378640000 | -2.2193740000 |
| 25     |               |               |               |
| energy |               |               |               |
| Al     | 1.5232200000  | -1.2899870000 | 1.9673710000  |
| Al     | 1.7984740000  | 1.5154180000  | 1.6901080000  |
| Al     | -2.1876240000 | 2.0629980000  | -0.7364900000 |
| Al     | 0.2867350000  | 0.1191570000  | -0.1675060000 |
| Al     | 2.3124380000  | 2.1098160000  | -1.2846980000 |
| Al     | 3.2084920000  | -0.2096240000 | 0.3454940000  |
| Al     | -2.4799910000 | -1.8809600000 | 0.4947160000  |
| Al     | -1.9667240000 | -0.5380100000 | -1.9475380000 |
| Al     | 1.5380570000  | -2.5517950000 | -0.6666950000 |
| Al     | -4.1218580000 | 0.1989030000  | -0.5984290000 |
| Al     | 2.5303650000  | -0.6722070000 | -2.4773470000 |
| B      | 0.0455340000  | 2.6561960000  | -0.5535310000 |
| B      | -1.1616080000 | 1.3572480000  | 1.4740200000  |
| B      | -1.2492460000 | -0.3538580000 | 1.8394630000  |
| B      | -0.2159220000 | -2.5872630000 | 0.6566310000  |
| B      | -0.6191840000 | -1.9980080000 | 2.1109680000  |
| B      | -0.6363890000 | -2.0777360000 | -0.8323980000 |
| B      | -0.2963970000 | 0.7350370000  | 3.0245040000  |
| B      | -0.2978280000 | -0.8512130000 | 3.1449640000  |
| B      | -0.1895030000 | 2.7883050000  | 1.0260950000  |
| B      | -0.1148800000 | 2.2278740000  | 2.4779250000  |
| B      | -0.0056240000 | 1.7222630000  | -1.7950510000 |
| B      | 0.1714540000  | -1.2402680000 | -1.9465520000 |
| B      | 0.1900350000  | 0.2828910000  | -2.3900120000 |
| B      | -1.9685620000 | 0.2928880000  | 0.5536130000  |
| 26     |               |               |               |
| energy |               |               |               |
| Al     | 2.0584880000  | -1.8235230000 | -0.0893700000 |
| Al     | 2.9634880000  | -0.0024410000 | 1.4728030000  |
| Al     | -1.1655190000 | 0.0003260000  | 2.8783160000  |
| Al     | -1.2190230000 | -2.0549350000 | 0.9741380000  |
| Al     | -1.2177170000 | 2.0570680000  | 0.9759340000  |
| Al     | -1.3498260000 | -1.3806450000 | -1.9319290000 |
| Al     | 2.6417280000  | -0.0027760000 | -2.3360180000 |
| Al     | 2.0607860000  | 1.8208420000  | -0.0878980000 |
| Al     | -1.3456670000 | 1.3856050000  | -1.9317950000 |
| Al     | -3.2764580000 | 1.3152670000  | -0.2404890000 |
| Al     | -3.2799840000 | -1.3138650000 | -0.2395980000 |
| B      | 1.1503000000  | -0.0005150000 | 2.6960890000  |
| B      | 0.7544390000  | -2.8666480000 | 1.4880560000  |
| B      | 0.7319370000  | -1.4389410000 | 2.2101360000  |
| B      | 0.3972490000  | -0.0001050000 | 0.9701360000  |
| B      | 0.5354200000  | -3.4812670000 | 0.0988660000  |
| B      | 0.4628090000  | -2.8065720000 | -1.2952110000 |
| B      | 0.8977070000  | -1.4205360000 | -1.9994740000 |
| B      | 0.5403180000  | 3.4809500000  | 0.0984450000  |
| B      | 0.7337910000  | 1.4382940000  | 2.2097880000  |
| B      | 0.3291210000  | 0.0000540000  | -2.5467850000 |
| B      | 0.9016750000  | 1.4191300000  | -1.9989360000 |
| B      | -1.1097950000 | 0.0014310000  | 0.0749540000  |
| B      | 0.5865940000  | -0.0001620000 | -0.7527370000 |
| B      | 0.7573110000  | 2.8660820000  | 1.4878160000  |
| B      | 0.4683520000  | 2.8064110000  | -1.2957930000 |
| 27     |               |               |               |
| energy |               |               |               |
| Al     | 0.8467680000  | 2.1470850000  | 2.1458080000  |
| Al     | 2.2847810000  | 0.0006420000  | -1.9694490000 |
| Al     | 0.8531270000  | 2.1587920000  | -2.1411740000 |
| Al     | -1.6211970000 | 1.2945690000  | -2.0207750000 |
| Al     | 0.8438120000  | -2.1502860000 | -2.1458320000 |
| Al     | -1.6309000000 | -1.2863350000 | -2.0272750000 |
| Al     | -1.6294970000 | -1.2906710000 | 2.0190600000  |
| Al     | -1.6296360000 | 1.2904960000  | 2.0250350000  |
| Al     | 0.8430280000  | -2.1572010000 | 2.1411060000  |

|    |               |               |               |
|----|---------------|---------------|---------------|
| Al | 2.2842810000  | -0.0063520000 | 1.9736540000  |
| Al | -3.8308440000 | 0.0045570000  | -0.0006890000 |
| B  | 2.7342840000  | 1.4925830000  | 0.0040470000  |
| B  | 1.8135000000  | -2.8071880000 | -0.0029150000 |
| B  | 0.9412990000  | 1.2810290000  | 0.0006560000  |
| B  | 1.8206020000  | 2.8021480000  | 0.0059730000  |
| B  | -1.2769450000 | 2.6578270000  | 0.0038050000  |
| B  | 0.2792090000  | 3.0220370000  | 0.0038150000  |
| B  | 0.1219830000  | 0.0001500000  | -0.8531390000 |
| B  | -2.3983150000 | 1.5536060000  | 0.0004090000  |
| B  | -1.2830520000 | -2.6549020000 | -0.0051410000 |
| B  | 0.2717090000  | -3.0247130000 | -0.0046510000 |
| B  | 0.9369170000  | -1.2848750000 | -0.0010880000 |
| B  | -2.4021920000 | -1.5481270000 | -0.0039480000 |
| B  | 0.1213170000  | -0.0013660000 | 0.8533310000  |
| B  | -1.4555250000 | 0.0017700000  | -0.0008010000 |
| B  | 2.7296060000  | -1.4995440000 | -0.0011060000 |
| B  | 3.2499230000  | -0.0042040000 | 0.0021340000  |

13

energy

|    |               |               |               |
|----|---------------|---------------|---------------|
| Al | -2.0721270000 | -1.3709720000 | -0.1874180000 |
| Al | 2.3446890000  | -1.2413810000 | -0.1157710000 |
| Al | 0.3306210000  | -2.1039960000 | -1.4941120000 |
| Al | 0.0117230000  | -2.0952450000 | 1.2277800000  |
| Al | -0.1066450000 | 2.1244080000  | 1.1781470000  |
| Al | 0.2106330000  | 2.0773690000  | -1.5451630000 |
| Al | -0.9846670000 | -0.0587870000 | -2.3179440000 |
| Al | -2.1444090000 | 1.2522550000  | -0.2216500000 |
| Al | 2.2705050000  | 1.3671190000  | -0.1491200000 |
| Al | 1.2514200000  | 0.0597320000  | 2.0029360000  |
| Al | -1.5617690000 | -0.0147930000 | 2.2288390000  |
| B  | 0.0785650000  | 0.0002970000  | -0.0798200000 |
| B  | 1.0915030000  | 0.0108590000  | -1.4971440000 |

14

energy

|    |               |               |               |
|----|---------------|---------------|---------------|
| Al | 0.0512590000  | 1.3311390000  | -2.1659020000 |
| Al | -1.4082070000 | 2.1415960000  | 0.0007950000  |
| Al | 0.0512180000  | 1.3301860000  | 2.1667250000  |
| Al | 1.3957590000  | 2.1436970000  | 0.0004330000  |
| Al | 3.4418590000  | -0.0015280000 | -0.0008140000 |
| Al | 0.0489390000  | -1.3318290000 | 2.1652900000  |
| Al | 1.3928890000  | -2.1460520000 | -0.0004410000 |
| Al | 0.0484100000  | -1.3310000000 | -2.1654220000 |
| Al | -2.2755160000 | 0.0027420000  | -1.4783150000 |
| Al | -2.2748730000 | 0.0015560000  | 1.4777760000  |
| Al | -1.4123630000 | -2.1399680000 | -0.0003950000 |
| B  | 1.3113560000  | -0.0010030000 | -0.8768500000 |
| B  | 1.3119400000  | -0.0012380000 | 0.8767720000  |
| B  | -0.1776670000 | 0.0008400000  | 0.0007850000  |

15

energy

|    |               |               |               |
|----|---------------|---------------|---------------|
| Al | 0.0343960000  | 0.3346300000  | -2.1087230000 |
| Al | -2.0931030000 | 1.5706330000  | -0.9980340000 |
| Al | 0.5022750000  | 2.3176180000  | -0.0781090000 |
| Al | 2.5344880000  | 1.0042260000  | -1.3344850000 |
| Al | -0.1755380000 | -2.1943820000 | -0.7476560000 |
| Al | 2.4250040000  | -1.5556600000 | -0.7286400000 |
| Al | -2.4141870000 | -0.9389950000 | -1.5206160000 |
| Al | -1.5470580000 | 1.9598850000  | 1.6333740000  |
| Al | 2.6050610000  | 0.4160820000  | 1.5226660000  |
| Al | 0.5243940000  | -1.5860090000 | 1.8545510000  |
| Al | -2.1930640000 | -1.5468780000 | 1.0680370000  |
| B  | 0.9391200000  | -0.0668540000 | 0.0024360000  |
| B  | 0.3393550000  | 0.6638320000  | 1.4751430000  |
| B  | -1.0586080000 | -0.0331710000 | 2.0385790000  |
| B  | -0.7468040000 | 0.0052050000  | 0.2216940000  |

16

energy  
Al -1.9741020000 1.9309130000 -0.0068530000  
Al -2.0599970000 0.0625030000 1.9151990000  
Al 0.1236700000 -1.2926310000 2.0559260000  
Al -2.8469930000 -1.4667890000 -0.1141130000  
Al 1.9428370000 1.2353250000 1.4953900000  
Al -0.2925280000 -2.4387160000 -0.4767310000  
Al 2.5789310000 -1.2874620000 1.0103220000  
Al 0.4732180000 3.1112630000 0.1124510000  
Al 1.9359090000 1.1252600000 -1.6917470000  
Al 1.9999640000 -1.5513870000 -1.5440270000  
Al -1.8295820000 0.1952840000 -2.2275940000  
B -0.9238890000 -0.2909320000 -0.0709410000  
B -0.1257800000 0.8467550000 1.0191190000  
B -0.0489970000 1.1123760000 -0.7748680000  
B 0.8711270000 -0.2538180000 0.0069880000  
B 0.0940910000 -0.4356470000 -1.5536730000

17

energy  
Al -2.2019340000 -0.5439310000 1.1482240000  
Al -3.5159170000 -0.6243980000 -1.2463990000  
Al -0.3123710000 -2.2748300000 0.2100700000  
Al -0.3907160000 -1.5444640000 2.8153860000  
Al 0.0102470000 3.3702550000 -0.2891440000  
Al -2.2121110000 2.0029330000 -0.2829420000  
Al 2.1587000000 1.9748870000 0.3023380000  
Al 3.5676830000 -0.1273840000 -0.5199580000  
Al -0.1359850000 1.0514210000 1.5173830000  
Al 1.7309760000 -0.8168650000 1.3258690000  
Al 1.9492320000 -1.6897600000 -1.7772360000  
B -1.5042040000 0.2801550000 -1.2528250000  
B -0.0945210000 1.1253100000 -0.8697330000  
B 0.0252020000 -0.3900450000 -1.5732310000  
B 1.3713830000 0.3381620000 -0.9266950000  
B -1.4195640000 -1.2994710000 -1.7724890000  
B -0.0625840000 -2.0765580000 -1.9343620000

18

energy  
Al 2.4985420000 -2.3927870000 0.1696990000  
Al 0.0068290000 -2.5758220000 0.5786990000  
Al -2.4845420000 -2.3960360000 0.1611190000  
Al -1.3224170000 2.6741810000 -0.1150770000  
Al -4.0921890000 -0.7545010000 -1.0163780000  
Al -3.5471270000 1.5312200000 0.3156010000  
Al -1.3891530000 0.0584240000 -1.1642820000  
Al 1.3117450000 2.6770470000 -0.1097600000  
Al 3.5420940000 1.5400400000 0.3052250000  
Al 1.3822810000 0.0539840000 -1.1592040000  
Al 4.0900970000 -0.7443470000 -1.0217290000  
B 0.8745780000 -0.5878210000 1.2480800000  
B -2.4577550000 -0.3923580000 0.8490740000  
B -0.8695790000 -0.5894820000 1.2439830000  
B 1.5987470000 0.9419030000 1.2183490000  
B -1.5978330000 0.9382650000 1.2160520000  
B 0.0005140000 0.9298110000 1.3210030000  
B 2.4613120000 -0.3859670000 0.8492870000

19

energy  
Al 1.2950660000 -0.7330920000 -1.4322870000  
Al 1.0663630000 3.2242980000 1.2027170000  
Al -2.1216200000 2.5964400000 -0.7012550000  
Al 0.3033560000 1.7665400000 -1.2964490000  
Al -1.4808860000 -0.5475110000 -1.2366110000  
Al 2.7302080000 1.5681830000 -0.0278000000  
Al 3.8851090000 -0.6386210000 -0.5353740000  
Al -0.0680380000 -2.8743450000 -0.0937670000  
Al 2.4201080000 -2.4366790000 0.5820190000

|    |               |               |               |
|----|---------------|---------------|---------------|
| Al | -2.9093540000 | -2.5484030000 | 0.2914870000  |
| Al | -3.9822410000 | 0.3453400000  | -0.1552040000 |
| B  | -0.4966370000 | 1.8117270000  | 1.1006770000  |
| B  | -0.9556190000 | -1.4783290000 | 1.2618580000  |
| B  | 0.8611100000  | 0.8230120000  | 1.0871800000  |
| B  | 2.0459600000  | -0.3024990000 | 0.8651980000  |
| B  | 0.5874020000  | -0.9289060000 | 1.1762190000  |
| B  | -2.0051800000 | 1.1349910000  | 0.9068110000  |
| B  | -0.7527420000 | 0.1697510000  | 1.3901330000  |
| B  | -2.2432780000 | -0.5073380000 | 1.0584880000  |

20

energy

|    |               |               |               |
|----|---------------|---------------|---------------|
| Al | 1.4747820000  | 0.0705040000  | -1.3392910000 |
| Al | 1.7929470000  | -2.1711270000 | 0.4743590000  |
| Al | 3.4691010000  | 1.7208500000  | 0.1386230000  |
| Al | 3.9565460000  | -0.9463310000 | -0.6116110000 |
| Al | 0.9686770000  | 2.5728090000  | -0.3626130000 |
| Al | -1.2102210000 | 0.9332190000  | -1.2860910000 |
| Al | -1.4417640000 | 3.2990930000  | 0.3358550000  |
| Al | -3.5503410000 | 1.6625580000  | -0.0710870000 |
| Al | -3.3929510000 | -1.6163050000 | -0.6909370000 |
| Al | -0.9394080000 | -3.7469360000 | 0.6611410000  |
| Al | -0.5021440000 | -1.8214520000 | -1.3271800000 |
| B  | 0.8684720000  | -0.2948370000 | 1.3926620000  |
| B  | 2.4334090000  | -0.0584170000 | 0.8604000000  |
| B  | 1.5989820000  | 1.2268820000  | 1.3778240000  |
| B  | 0.0116700000  | 1.3419700000  | 1.4893390000  |
| B  | -0.0833970000 | -1.6587380000 | 1.3297620000  |
| B  | -1.5790610000 | 1.3244510000  | 1.2229620000  |
| B  | -2.3692750000 | -0.0420530000 | 0.6986200000  |
| B  | -0.8540900000 | -0.1668890000 | 1.3597380000  |
| B  | -1.6522960000 | -1.5602640000 | 0.8736570000  |

12

energy

|    |               |               |               |
|----|---------------|---------------|---------------|
| Al | -1.3128940000 | -2.3306800000 | -0.4191290000 |
| Al | 2.3635980000  | 1.6114520000  | -0.8708980000 |
| Al | -0.0918470000 | -1.3384810000 | 1.8581010000  |
| Al | -0.1556730000 | 1.3079430000  | 1.8451800000  |
| Al | 2.0609470000  | -0.0267590000 | 1.2758430000  |
| Al | 1.3220570000  | -2.4396510000 | 0.0012050000  |
| Al | -2.2446370000 | -0.1534740000 | 1.1714160000  |
| Al | 0.2273590000  | 2.8878560000  | -0.0691440000 |
| Al | -2.6368550000 | -0.5257320000 | -1.7367580000 |
| Al | -2.1088340000 | 1.7899970000  | -0.7262920000 |
| Al | 0.0230960000  | 0.0481880000  | -0.7183450000 |
| Al | 2.5536820000  | -0.8306600000 | -1.6111810000 |

13

energy

|    |               |               |               |
|----|---------------|---------------|---------------|
| Al | -0.3198790000 | -2.3056190000 | 1.1293110000  |
| Al | 1.0959340000  | -2.0542630000 | -1.1281620000 |
| Al | -1.6146640000 | -1.6777170000 | -1.1261290000 |
| Al | -0.0017090000 | -0.0017030000 | -2.3555340000 |
| Al | -2.2933740000 | -0.4074370000 | 1.1303510000  |
| Al | -2.0940550000 | 1.0165350000  | -1.1275420000 |
| Al | 1.6152490000  | 1.6792500000  | 1.1272800000  |
| Al | 2.2913120000  | 0.4071240000  | -1.1280490000 |
| Al | 2.0953880000  | -1.0176670000 | 1.1286420000  |
| Al | 0.3202500000  | 2.3050940000  | -1.1303260000 |
| Al | -1.0959040000 | 2.0548490000  | 1.1272800000  |
| Al | 0.0011800000  | 0.0015240000  | 2.3532170000  |
| B  | 0.0007050000  | 0.0000820000  | -0.0008800000 |

22

energy

|    |               |               |               |
|----|---------------|---------------|---------------|
| Al | 1.7710720000  | 0.4334940000  | -1.2101910000 |
| Al | -1.3915930000 | -1.0236770000 | -1.1492760000 |
| Al | -2.0861410000 | -3.3347820000 | 0.1686640000  |
| Al | 2.8045650000  | -2.0847890000 | -0.6743540000 |

|    |               |               |               |
|----|---------------|---------------|---------------|
| Al | 0.4538980000  | -3.2112270000 | -0.6751440000 |
| Al | 4.4546790000  | -0.1680800000 | -0.5580670000 |
| Al | -0.6048540000 | 1.6653710000  | -1.4652670000 |
| Al | -3.3560130000 | 1.0036380000  | -0.5587920000 |
| Al | 1.4506940000  | 2.7057700000  | 0.5541260000  |
| Al | -2.3755020000 | 3.5757650000  | -0.7099450000 |
| Al | -3.8789650000 | -1.2504340000 | 0.9216220000  |
| Al | 3.5199120000  | 1.3882340000  | 1.3660890000  |
| B  | -0.3108370000 | -2.1370300000 | 1.0628880000  |
| B  | 1.1372800000  | -1.3455490000 | 0.9628170000  |
| B  | 2.5074140000  | -0.4872150000 | 0.8235730000  |
| B  | 1.1751180000  | 0.4041440000  | 1.2548690000  |
| B  | -1.7987230000 | 1.8346890000  | 0.7594560000  |
| B  | -0.6006680000 | 2.8528580000  | 0.5288050000  |
| B  | -0.2639950000 | 1.2701270000  | 1.2123740000  |
| B  | -1.7155110000 | -1.3691440000 | 1.3079400000  |
| B  | -0.3057580000 | -0.4878620000 | 1.3559380000  |
| B  | -1.8048780000 | 0.2468470000  | 1.1067290000  |

23

energy

|    |               |               |               |
|----|---------------|---------------|---------------|
| Al | 0.2887970000  | 1.2372520000  | -0.8475060000 |
| Al | -0.5767030000 | -2.1929630000 | 0.4501090000  |
| Al | -1.4688380000 | -0.5234150000 | -1.7274860000 |
| Al | -4.0613970000 | 0.2132640000  | -1.4688890000 |
| Al | 1.0461140000  | -1.4046390000 | -1.5081480000 |
| Al | 3.2233020000  | 0.8182770000  | -1.3177340000 |
| Al | 3.6872880000  | -2.0147540000 | -1.0709610000 |
| Al | 2.2008910000  | 3.0979810000  | -0.0967270000 |
| Al | 2.0869600000  | -2.4986290000 | 1.1906760000  |
| Al | -0.3735760000 | 3.5639580000  | 0.5529710000  |
| Al | -2.3246900000 | 1.9306670000  | -0.1139740000 |
| Al | -3.4361410000 | -2.1824220000 | -0.2496270000 |
| B  | -0.6834060000 | 1.6397740000  | 1.6258830000  |
| B  | -0.0232270000 | 0.2121590000  | 2.2202420000  |
| B  | 0.5617080000  | -1.3899060000 | 2.3374860000  |
| B  | -1.0078340000 | -1.1671960000 | 2.4144800000  |
| B  | -2.7875060000 | -0.1295480000 | 0.4025490000  |
| B  | -1.6702220000 | 0.3094840000  | 1.6089380000  |
| B  | -2.3303860000 | -1.2535450000 | 1.4973910000  |
| B  | 1.5165120000  | -0.2699180000 | 1.5522320000  |
| B  | 2.1922950000  | 1.0151700000  | 0.6646290000  |
| B  | 0.9012990000  | 1.4572210000  | 1.5387870000  |
| B  | 2.5715470000  | -0.5395980000 | 0.2763530000  |

24

energy

|    |               |               |               |
|----|---------------|---------------|---------------|
| Al | -2.4526120000 | -1.2677670000 | -1.7164690000 |
| Al | -0.1451490000 | 0.0084060000  | -2.4363720000 |
| Al | -0.6359660000 | 2.6279260000  | -1.4142950000 |
| Al | 1.6257220000  | 0.8573770000  | 2.1440070000  |
| Al | 1.4878390000  | -1.7448070000 | 1.2790640000  |
| Al | 1.6742180000  | 2.3105590000  | 0.0298560000  |
| Al | 1.7782580000  | -1.8577890000 | -1.4791810000 |
| Al | 2.2751090000  | 0.8215300000  | -1.9227290000 |
| Al | -0.6760470000 | 2.4226230000  | 1.3409870000  |
| Al | -2.9452480000 | 1.6725350000  | 0.0504420000  |
| Al | 3.4606130000  | -0.2612960000 | 0.2802940000  |
| Al | -2.3766300000 | -1.6958380000 | 0.8497980000  |
| B  | -0.3724440000 | -2.0615300000 | -1.9819760000 |
| B  | -0.2752750000 | -1.2037360000 | -0.2790340000 |
| B  | -0.4070810000 | -2.8553280000 | 0.8364800000  |
| B  | -0.3354870000 | -2.9561870000 | -0.7148340000 |
| B  | -1.3842050000 | -0.7000770000 | 2.5815660000  |
| B  | -1.2222280000 | 0.2183620000  | -0.1143690000 |
| B  | -1.9672390000 | 0.4640620000  | 1.4929170000  |
| B  | -0.5225600000 | -2.0316620000 | 2.1847320000  |
| B  | -0.6029790000 | 0.7160290000  | 2.5971710000  |
| B  | 0.2375500000  | -0.6849920000 | 2.8573530000  |

|   |               |              |               |
|---|---------------|--------------|---------------|
| B | 0.8192040000  | 0.1391200000 | -0.0857420000 |
| B | -1.9495320000 | 0.8329440000 | -1.5883080000 |

25

|        |               |               |               |
|--------|---------------|---------------|---------------|
| energy |               |               |               |
| Al     | 1.3239190000  | 1.8547030000  | -2.0498990000 |
| Al     | -1.2322130000 | 1.6545140000  | -2.1076680000 |
| Al     | 0.3967120000  | -2.2052230000 | -2.1574650000 |
| Al     | 2.3865530000  | -0.5309760000 | -2.1136220000 |
| Al     | 1.3224410000  | 1.8668260000  | 2.0408870000  |
| Al     | 2.3849540000  | -0.5184450000 | 2.1164220000  |
| Al     | 0.3966020000  | -2.1941350000 | 2.1701550000  |
| Al     | -1.8430230000 | -0.9380690000 | -2.1401430000 |
| Al     | -3.0004090000 | 0.9430240000  | -0.0031810000 |
| Al     | -1.2334460000 | 1.6654540000  | 2.0981970000  |
| Al     | -1.8432430000 | -0.9271360000 | 2.1443060000  |
| Al     | -3.1769680000 | -1.6568040000 | 0.0039130000  |
| B      | -0.1548620000 | 1.3670200000  | -0.0036040000 |
| B      | 1.3174830000  | 2.7486130000  | -0.0072730000 |
| B      | 0.0073490000  | -0.1235990000 | -0.8799820000 |
| B      | 3.0599610000  | -1.3398840000 | 0.0042110000  |
| B      | 3.0351340000  | 0.2062070000  | -0.0005810000 |
| B      | 2.4605190000  | 1.6965410000  | -0.0034710000 |
| B      | 1.3281260000  | -0.8547440000 | 0.0022530000  |
| B      | -0.2141240000 | 3.1543950000  | -0.0083190000 |
| B      | -1.6222340000 | 2.4850650000  | -0.0070350000 |
| B      | 1.9531380000  | -2.4963090000 | 0.0068690000  |
| B      | 0.4106320000  | -2.6616530000 | 0.0074400000  |
| B      | 0.0073820000  | -0.1188720000 | 0.8807160000  |
| B      | -0.8813890000 | -1.4984860000 | 0.0038320000  |

26

|        |               |               |               |
|--------|---------------|---------------|---------------|
| energy |               |               |               |
| Al     | 1.8242540000  | 2.3956180000  | 0.0031720000  |
| Al     | -2.1413810000 | 0.6990870000  | 2.0471860000  |
| Al     | 1.9955410000  | 0.5162870000  | 2.0657010000  |
| Al     | 0.9732930000  | -1.8123170000 | 2.0717930000  |
| Al     | -1.6330040000 | -1.8661680000 | 2.1318130000  |
| Al     | -0.0726180000 | 2.2103450000  | -2.1098740000 |
| Al     | 0.9760110000  | -1.8083240000 | -2.0749750000 |
| Al     | 1.9988710000  | 0.5201630000  | -2.0632220000 |
| Al     | -1.6294660000 | -1.8572460000 | -2.1369700000 |
| Al     | -2.1437130000 | 0.7061270000  | -2.0478570000 |
| Al     | -0.0740220000 | 2.2083470000  | 2.1149120000  |
| Al     | 3.3370040000  | -1.5052780000 | -0.0008640000 |
| B      | -2.5843190000 | 1.5943460000  | 0.0013710000  |
| B      | -0.6794900000 | 1.4431550000  | 0.0013280000  |
| B      | 2.7853080000  | 0.5477510000  | 0.0018940000  |
| B      | -0.0899520000 | 3.1061650000  | 0.0030310000  |
| B      | -0.1359600000 | 0.0280580000  | 0.8607840000  |
| B      | -0.1360650000 | 0.0294930000  | -0.8617980000 |
| B      | -0.2102820000 | -2.7599960000 | -0.0018120000 |
| B      | 1.3843910000  | -2.2768490000 | -0.0017660000 |
| B      | -1.7830090000 | -2.7026190000 | -0.0041210000 |
| B      | -2.8592410000 | -1.5043200000 | -0.0022200000 |
| B      | -3.0629480000 | 0.0521550000  | -0.0006630000 |
| B      | -1.1700650000 | -1.0684750000 | -0.0008990000 |
| B      | 1.3432200000  | -0.4349160000 | -0.0001540000 |
| B      | -1.6695910000 | 2.8887810000  | 0.0029020000  |

27

|        |               |               |               |
|--------|---------------|---------------|---------------|
| energy |               |               |               |
| Al     | 2.7444420000  | 2.1797770000  | 0.0002230000  |
| Al     | -2.0274260000 | 1.1685140000  | 1.9932340000  |
| Al     | 2.0079310000  | 0.0977720000  | 2.0452500000  |
| Al     | 0.5711180000  | -2.0364590000 | 2.0316860000  |
| Al     | -1.9950300000 | -1.4490400000 | 2.1421820000  |
| Al     | 0.3624670000  | 2.1613000000  | -2.0901840000 |
| Al     | 0.5698090000  | -2.0358690000 | -2.0327430000 |
| Al     | 2.0073710000  | 0.0980950000  | -2.0451710000 |

|    |               |               |               |
|----|---------------|---------------|---------------|
| Al | -1.9953530000 | -1.4453250000 | -2.1437150000 |
| Al | -2.0270410000 | 1.1719590000  | -1.9918740000 |
| Al | 0.3615020000  | 2.1593260000  | 2.0916410000  |
| Al | 3.2490360000  | -1.9132980000 | -0.0008490000 |
| B  | -2.0361730000 | 2.4761900000  | 0.0015810000  |
| B  | -0.4057820000 | 1.5250370000  | 0.0002240000  |
| B  | 2.7896620000  | 0.0961270000  | -0.0000060000 |
| B  | 0.8099410000  | 2.9315680000  | 0.0010150000  |
| B  | -0.1840580000 | -0.0063420000 | 0.8516790000  |
| B  | -0.1841090000 | -0.0058620000 | -0.8517490000 |
| B  | -0.1790890000 | -3.0853710000 | -0.0005460000 |
| B  | 1.3072980000  | -2.5966500000 | -0.0008630000 |
| B  | -1.6985370000 | -2.6844420000 | -0.0016560000 |
| B  | -2.9755250000 | -1.8005650000 | -0.0009630000 |
| B  | -3.2049140000 | -0.2532620000 | -0.0004060000 |
| B  | -1.4600240000 | -0.8621270000 | -0.0002040000 |
| B  | 1.2174910000  | -0.7682760000 | -0.0000340000 |
| B  | -0.6871090000 | 3.3079920000  | 0.0020390000  |
| B  | -3.0640230000 | 1.3184280000  | 0.0007240000  |

28

energy

|    |               |               |               |
|----|---------------|---------------|---------------|
| Al | -0.2156810000 | 2.2884100000  | 2.1460940000  |
| Al | 0.7079380000  | -1.8982740000 | 2.0055800000  |
| Al | 1.6853200000  | 0.4886040000  | 2.0279150000  |
| Al | -1.9069780000 | -1.6995560000 | 2.1440250000  |
| Al | -2.3761450000 | 0.8487610000  | 1.9812200000  |
| Al | -1.9103230000 | -1.6968600000 | -2.1419550000 |
| Al | 0.7053870000  | -1.8966960000 | -2.0127370000 |
| Al | 3.3615230000  | -1.5789090000 | -0.0000770000 |
| Al | 1.6787250000  | 0.4917350000  | -2.0322210000 |
| Al | -2.3806540000 | 0.8506510000  | -1.9750190000 |
| Al | -0.2221670000 | 2.2926830000  | -2.1452540000 |
| Al | 4.8192000000  | 0.8001610000  | 0.0013060000  |
| B  | -2.2651780000 | 2.3659560000  | 0.0033360000  |
| B  | -0.3848410000 | 0.0218820000  | 0.8490710000  |
| B  | -0.0551020000 | -2.9866690000 | -0.0025700000 |
| B  | -1.6385350000 | -2.7385130000 | -0.0002690000 |
| B  | -3.3743610000 | -0.4156360000 | 0.0032120000  |
| B  | -3.2927780000 | 1.1608910000  | 0.0043520000  |
| B  | -1.6293400000 | -0.8512150000 | 0.0013850000  |
| B  | 1.3802620000  | -2.3803150000 | -0.0039230000 |
| B  | 1.0749060000  | -0.6067540000 | -0.0027590000 |
| B  | 2.4915660000  | 0.5325200000  | -0.0035780000 |
| B  | -0.3872650000 | 0.0225230000  | -0.8492570000 |
| B  | -0.9480310000 | 3.2577560000  | 0.0026780000  |
| B  | 0.5746200000  | 2.9368800000  | 0.0000680000  |
| B  | -0.6536060000 | 1.5235190000  | 0.0007170000  |
| B  | 1.8354700000  | 1.9675980000  | -0.0014210000 |
| B  | -2.9877650000 | -1.9662610000 | 0.0018790000  |

14

energy

|    |               |               |               |
|----|---------------|---------------|---------------|
| Al | 1.2959240000  | -1.6568360000 | -1.5954140000 |
| Al | -3.5911810000 | 0.0002610000  | -0.0004410000 |
| Al | -1.0313320000 | 2.0140930000  | -1.0767060000 |
| Al | -1.0313590000 | -0.3985860000 | -2.2484370000 |
| Al | -1.0334340000 | -2.2599100000 | -0.3168580000 |
| Al | 1.2983320000  | 1.0048940000  | -2.0667170000 |
| Al | 2.7552530000  | -0.0015590000 | 0.0053210000  |
| Al | 1.2923020000  | -2.0302750000 | 1.0832550000  |
| Al | -1.0358090000 | -0.9977170000 | 2.0517880000  |
| Al | 1.2908510000  | 0.4027270000  | 2.2666840000  |
| Al | -1.0352240000 | 1.6445100000  | 1.5800010000  |
| Al | 1.2952150000  | 2.2784240000  | 0.3182240000  |
| B  | 0.2170750000  | 0.0001610000  | -0.0005770000 |
| B  | -1.4378730000 | -0.0002260000 | -0.0012430000 |

15

energy

|    |               |               |               |
|----|---------------|---------------|---------------|
| Al | -1.2047140000 | 0.7277620000  | 2.1058350000  |
| Al | -0.5618020000 | -2.1024740000 | 1.0182890000  |
| Al | 1.1467060000  | -0.5879450000 | 2.3381710000  |
| Al | 0.9822270000  | 2.0705670000  | 1.3082560000  |
| Al | 2.7838290000  | 0.2783430000  | 0.3992190000  |
| Al | 1.8660260000  | -2.2305720000 | -0.1875690000 |
| Al | -3.0022160000 | -0.8492620000 | 0.8217810000  |
| Al | 1.6363380000  | -0.2908030000 | -2.1719770000 |
| Al | 1.2060220000  | 2.0871070000  | -1.3438780000 |
| Al | -0.5791700000 | -1.7662790000 | -1.6851000000 |
| Al | -1.4359270000 | 2.2938900000  | -0.2986860000 |
| Al | -2.5193920000 | 0.2258410000  | -1.7627580000 |
| B  | -1.0887200000 | -0.1176080000 | -0.0069180000 |
| B  | 0.6036070000  | -0.0337900000 | -0.0258880000 |
| B  | -0.3414990000 | 0.5253410000  | -1.3753110000 |

16

energy

|    |               |               |               |
|----|---------------|---------------|---------------|
| Al | 2.0223140000  | 0.8836060000  | -1.8405130000 |
| Al | 2.5772470000  | -1.5151270000 | -0.8101480000 |
| Al | -2.0944760000 | 1.1827180000  | -1.5359950000 |
| Al | 1.6655000000  | 2.1368230000  | 0.5437630000  |
| Al | -0.8578630000 | 3.1031220000  | 0.1230270000  |
| Al | -2.0576330000 | -1.8262600000 | 1.1912240000  |
| Al | -2.3690620000 | -1.4537760000 | -1.3343290000 |
| Al | 2.7214570000  | -0.2921650000 | 1.5151510000  |
| Al | 0.3564470000  | -2.3139890000 | 0.2769270000  |
| Al | 0.0775450000  | -0.8996210000 | -2.1338020000 |
| Al | -2.2031040000 | 0.7744500000  | 1.5564700000  |
| Al | 0.1949620000  | -0.4546870000 | 2.4615600000  |
| B  | -0.0183210000 | 1.0784080000  | -0.8891640000 |
| B  | -0.1580500000 | 1.0556870000  | 0.8645640000  |
| B  | 0.9275900000  | -0.1023910000 | 0.0270650000  |
| B  | -0.8378900000 | -0.2769520000 | -0.0371300000 |

17

energy

|    |               |               |               |
|----|---------------|---------------|---------------|
| Al | 3.6044570000  | -1.1136210000 | -0.8691560000 |
| Al | 1.2773230000  | -2.0889630000 | -0.5328470000 |
| Al | -1.2793210000 | -2.0872050000 | -0.5368080000 |
| Al | 2.1647900000  | -0.1481770000 | 1.2790210000  |
| Al | -3.6067170000 | -1.1118780000 | -0.8700000000 |
| Al | -0.0004850000 | -1.6854680000 | 1.9640860000  |
| Al | 0.0005340000  | 1.0927230000  | 2.3197940000  |
| Al | 1.2833290000  | 2.1394340000  | 0.0529880000  |
| Al | -2.1639220000 | -0.1491630000 | 1.2783740000  |
| Al | -1.2814760000 | 2.1394030000  | 0.0566440000  |
| Al | 3.4537950000  | 1.3951000000  | -1.0768880000 |
| Al | -3.4522100000 | 1.3971090000  | -1.0744310000 |
| B  | -0.0003560000 | -0.6535000000 | -1.6051640000 |
| B  | 1.4246680000  | 0.1237140000  | -1.1874480000 |
| B  | 0.0000640000  | 1.0153800000  | -1.3607850000 |
| B  | -1.4252570000 | 0.1253900000  | -1.1880760000 |
| B  | 0.0006270000  | -0.0371460000 | 0.1654520000  |

18

energy

|    |               |               |               |
|----|---------------|---------------|---------------|
| Al | 1.3149860000  | -1.5069810000 | 1.1428100000  |
| Al | 0.7555650000  | -2.4546450000 | -1.5637810000 |
| Al | 3.1995800000  | 0.5819080000  | 0.0242050000  |
| Al | 3.1451900000  | -1.9333840000 | -0.8003730000 |
| Al | 2.1621820000  | 2.9354420000  | -0.6129140000 |
| Al | 0.8247020000  | 1.1131860000  | 1.4488130000  |
| Al | -0.4894870000 | -0.7499600000 | 3.1005540000  |
| Al | -0.5080700000 | 3.1782510000  | -0.2156570000 |
| Al | -1.2816040000 | -1.9702610000 | 0.7330100000  |
| Al | -1.7867490000 | 0.7101080000  | 1.2241640000  |
| Al | -3.1234950000 | 1.5515490000  | -0.9006430000 |
| Al | -3.5483170000 | -1.4377900000 | -0.8078780000 |
| B  | -0.1100040000 | -0.2833300000 | -1.3431600000 |

|   |               |               |               |
|---|---------------|---------------|---------------|
| B | 1.5532820000  | -0.3104160000 | -1.0824310000 |
| B | 0.7148360000  | 1.1079940000  | -0.9276230000 |
| B | -1.1479380000 | -1.6386020000 | -1.4168200000 |
| B | -0.9241440000 | 1.2400640000  | -1.1026650000 |
| B | -1.8136930000 | -0.1610120000 | -1.3353080000 |

19

energy

|    |               |               |               |
|----|---------------|---------------|---------------|
| Al | 1.4833120000  | -0.5080950000 | 1.2324250000  |
| Al | -1.4199280000 | -0.5842250000 | 1.2086260000  |
| Al | -0.1049570000 | -2.9235780000 | -0.1219560000 |
| Al | -2.6155920000 | -2.8453640000 | 0.0489070000  |
| Al | 2.3011870000  | -2.3629600000 | -0.8833950000 |
| Al | -3.2480850000 | -0.6376350000 | -1.0110160000 |
| Al | 0.0137580000  | 0.3180050000  | 3.2924020000  |
| Al | 2.6650740000  | 1.6501000000  | -0.7266740000 |
| Al | 3.9711070000  | -0.5062090000 | -0.0950540000 |
| Al | -2.5017660000 | 1.7026140000  | -0.2570010000 |
| Al | 0.0833220000  | 1.9043820000  | 1.1724170000  |
| Al | -0.9258320000 | 3.7604510000  | -0.5292930000 |
| B  | -1.2228260000 | -1.3956880000 | -1.1529250000 |
| B  | 1.8711070000  | -0.3187200000 | -1.1942460000 |
| B  | 0.3466820000  | -0.9139940000 | -1.1394660000 |
| B  | -1.0390600000 | 0.2077820000  | -1.3873550000 |
| B  | 0.7136490000  | 0.8307830000  | -1.3424170000 |
| B  | -0.6464210000 | 1.7756960000  | -1.4506780000 |
| B  | 0.7527080000  | 2.4986770000  | -0.9919240000 |

20

energy

|    |               |               |               |
|----|---------------|---------------|---------------|
| Al | -0.3160680000 | 3.4317200000  | -0.9168860000 |
| Al | -1.4779560000 | -0.5661950000 | 1.1953490000  |
| Al | -2.8544270000 | -1.9317110000 | -0.8301800000 |
| Al | -0.5435640000 | -2.9564910000 | -0.2584180000 |
| Al | -2.3014990000 | 1.9524350000  | -0.0420410000 |
| Al | -4.0418350000 | 0.1030160000  | 0.1593820000  |
| Al | 2.3918630000  | 2.8967080000  | -0.3118970000 |
| Al | 0.1729360000  | -0.0060320000 | 3.2357880000  |
| Al | 3.9182830000  | -0.1639160000 | 0.1084670000  |
| Al | 2.3616820000  | -3.0805440000 | -0.7019300000 |
| Al | 1.2575590000  | -1.2449380000 | 1.1702420000  |
| Al | 0.4423340000  | 1.5373190000  | 1.1329070000  |
| B  | -0.7529750000 | 0.9327670000  | -1.3803670000 |
| B  | -0.7946470000 | -0.8552600000 | -1.3847610000 |
| B  | -2.1275130000 | 0.0814620000  | -1.1433790000 |
| B  | 0.7346620000  | 1.6561810000  | -1.3563290000 |
| B  | 0.6469310000  | -1.6520700000 | -1.4073120000 |
| B  | 0.7034050000  | 0.0060560000  | -1.5045580000 |
| B  | 2.0909040000  | 0.7913370000  | -0.9942740000 |
| B  | 2.0750340000  | -0.8860370000 | -1.0750590000 |

21

energy

|    |               |               |               |
|----|---------------|---------------|---------------|
| Al | -0.0009910000 | -2.5362240000 | 0.4054310000  |
| Al | 1.3474400000  | -0.8163270000 | -1.4669560000 |
| Al | 4.0735980000  | -0.7770220000 | -1.0181500000 |
| Al | 1.2952700000  | 3.2665280000  | 0.5122160000  |
| Al | 2.8179220000  | 1.4180390000  | -0.5528060000 |
| Al | -1.3494720000 | -0.8133350000 | -1.4701620000 |
| Al | -2.8180970000 | 1.4190020000  | -0.5491320000 |
| Al | 0.0008850000  | 1.5309470000  | -1.1742810000 |
| Al | -1.2918520000 | 3.2670590000  | 0.5094270000  |
| Al | -2.6822030000 | -2.4991210000 | 0.3795530000  |
| Al | 2.6817330000  | -2.5002340000 | 0.3820050000  |
| Al | -4.0756730000 | -0.7747890000 | -1.0156150000 |
| B  | -1.3784590000 | -0.9121980000 | 1.7852160000  |
| B  | 0.0006250000  | -1.4714690000 | 2.3154500000  |
| B  | 1.3792020000  | -0.9113350000 | 1.7844310000  |
| B  | 0.0003840000  | 0.1373980000  | 1.9276230000  |
| B  | 0.0003200000  | 1.6637570000  | 1.3504620000  |

|   |              |              |             |
|---|--------------|--------------|-------------|
| B | 2.514910000  | -0.323408000 | 0.781289000 |
| B | 1.402454000  | 0.830469000  | 1.212648000 |
| B | -1.401603000 | 0.830524000  | 1.212766000 |
| B | -2.514088000 | -0.323497000 | 0.782140000 |

13

energy

|    |              |              |              |
|----|--------------|--------------|--------------|
| Al | -0.955090000 | -1.429766000 | -2.053488000 |
| Al | -1.486566000 | -2.212401000 | 0.564132000  |
| Al | 1.158856000  | -2.404391000 | -0.540784000 |
| Al | 2.657284000  | -0.197701000 | 0.564509000  |
| Al | 0.744197000  | -1.522517000 | 2.067363000  |
| Al | 1.711545000  | -0.153102000 | -2.052402000 |
| Al | -0.004260000 | 0.004564000  | -0.000574000 |
| Al | -1.162335000 | 2.393055000  | 0.602374000  |
| Al | -0.759162000 | 1.590143000  | -2.027859000 |
| Al | 0.987229000  | 1.443366000  | 2.033633000  |
| Al | -1.748522000 | 0.107693000  | 2.034077000  |
| Al | -2.653972000 | 0.190369000  | -0.597204000 |
| Al | 1.510795000  | 2.190688000  | -0.593776000 |

14

energy

|    |              |              |              |
|----|--------------|--------------|--------------|
| Al | 0.148970000  | 0.735577000  | -2.468780000 |
| Al | -0.815201000 | 2.473003000  | -0.591370000 |
| Al | 0.147503000  | 1.770930000  | 1.871140000  |
| Al | -0.814165000 | -0.724708000 | 2.437202000  |
| Al | 0.150912000  | -2.505247000 | 0.597819000  |
| Al | -0.813127000 | -1.748615000 | -1.846248000 |
| Al | 1.638969000  | 1.533601000  | -0.363579000 |
| Al | -2.288122000 | 1.060767000  | 1.119685000  |
| Al | 1.639838000  | -0.449794000 | 1.510149000  |
| Al | -2.286225000 | -1.503024000 | 0.359577000  |
| Al | 1.640463000  | -1.080811000 | -1.145584000 |
| Al | -2.287286000 | 0.438008000  | -1.479984000 |
| Al | 4.053577000  | 0.000308000  | 0.000046000  |
| B  | -0.301873000 | 0.000013000  | -0.000188000 |

23

energy

|    |              |              |              |
|----|--------------|--------------|--------------|
| Al | -1.383241000 | -3.325743000 | -0.853771000 |
| Al | -0.443303000 | -1.281717000 | 1.070340000  |
| Al | 2.040246000  | -0.491836000 | 1.693749000  |
| Al | 4.517712000  | 0.130443000  | 0.706603000  |
| Al | 1.132040000  | -3.067368000 | -0.301451000 |
| Al | 3.408941000  | -1.856789000 | -0.388056000 |
| Al | 1.014559000  | 3.418548000  | -1.085179000 |
| Al | 2.785406000  | 2.012681000  | 0.247636000  |
| Al | -2.319366000 | 0.640218000  | 1.647258000  |
| Al | -4.781931000 | 0.488007000  | 0.427149000  |
| Al | 0.214273000  | 1.437756000  | 1.206895000  |
| Al | -1.510674000 | 3.048159000  | -0.348672000 |
| Al | -3.153599000 | -1.814166000 | 0.392256000  |
| B  | -1.489787000 | -0.913646000 | -1.171135000 |
| B  | -0.073560000 | -1.600107000 | -1.562214000 |
| B  | 1.315704000  | -0.857063000 | -1.122834000 |
| B  | -0.119488000 | 0.018327000  | -1.756119000 |
| B  | -0.117667000 | 1.640437000  | -1.630434000 |
| B  | 2.595114000  | 0.081503000  | -0.719260000 |
| B  | 1.272021000  | 0.945643000  | -1.154143000 |
| B  | -1.527091000 | 0.922062000  | -1.157854000 |
| B  | -2.842258000 | -0.035198000 | -0.786449000 |
| B  | -2.967753000 | 1.518739000  | -0.417934000 |

24

energy

|    |              |              |              |
|----|--------------|--------------|--------------|
| Al | -2.729381000 | -1.883787000 | -0.501804000 |
| Al | -0.730780000 | -1.064977000 | -2.533387000 |
| Al | -2.718212000 | 0.507605000  | -1.534806000 |
| Al | -1.993776000 | -1.068991000 | 1.812098000  |
| Al | -0.440445000 | 1.890169000  | -1.889735000 |

|    |               |               |               |
|----|---------------|---------------|---------------|
| Al | 2.2403160000  | 1.1944120000  | 1.5147110000  |
| Al | 1.5712700000  | -1.3872450000 | 1.4040120000  |
| Al | 1.4767560000  | -2.4720010000 | -1.1067680000 |
| Al | 1.7060460000  | 0.0393800000  | -2.3387360000 |
| Al | 3.4563240000  | -0.5140510000 | -0.2903070000 |
| Al | -0.0740760000 | 2.7608350000  | 0.5948950000  |
| Al | -2.6734510000 | 2.2706220000  | 0.2969580000  |
| Al | 2.1419850000  | 2.1235160000  | -0.9160240000 |
| B  | -0.7008880000 | -2.5505770000 | -0.9791070000 |
| B  | -0.3853740000 | -1.0025800000 | -0.1526450000 |
| B  | -0.2252130000 | -2.4723310000 | 2.0751760000  |
| B  | -0.4173760000 | -2.7887480000 | 0.5631800000  |
| B  | -0.7248430000 | 0.2832840000  | 2.9346270000  |
| B  | -1.5195930000 | 1.1682680000  | 1.7331760000  |
| B  | -1.1221420000 | 0.4614080000  | 0.1829460000  |
| B  | 0.0051690000  | -1.2104090000 | 2.9938280000  |
| B  | 0.1487940000  | 1.4815890000  | 2.2515450000  |
| B  | 0.9380110000  | 0.1595790000  | 2.8969690000  |
| B  | 0.7987490000  | 0.2422470000  | -0.2285740000 |

25

energy

|    |               |               |               |
|----|---------------|---------------|---------------|
| Al | -1.0265920000 | -1.4386820000 | -1.7780460000 |
| Al | -1.1991260000 | -0.2497230000 | 2.0631480000  |
| Al | -3.4246220000 | 0.9972540000  | 0.9031940000  |
| Al | -1.1549410000 | 1.4098090000  | -1.9234740000 |
| Al | 2.8759400000  | 0.6267820000  | -1.7524370000 |
| Al | 2.4162260000  | 1.8133270000  | 0.5734570000  |
| Al | 3.0822520000  | -1.9431050000 | -0.7823430000 |
| Al | -3.2536880000 | -0.0640840000 | -1.6702170000 |
| Al | -0.6450730000 | -2.6747510000 | 0.7231700000  |
| Al | -2.9787870000 | -1.5975130000 | 0.4990790000  |
| Al | 2.6305310000  | -0.4660420000 | 1.8222070000  |
| Al | -1.0989830000 | 2.1255640000  | 0.6533380000  |
| Al | 0.7281130000  | -0.0854880000 | -0.1697590000 |
| B  | 0.6097950000  | 1.2149740000  | 2.7501670000  |
| B  | 0.5434270000  | 2.7579960000  | -1.0416540000 |
| B  | 0.7455240000  | 3.2044390000  | 0.4747930000  |
| B  | 0.7994820000  | 0.1873810000  | -2.5712750000 |
| B  | 0.9477210000  | 1.7179700000  | -2.1937110000 |
| B  | 1.4643670000  | -2.1357940000 | 0.7282690000  |
| B  | 0.8599790000  | -2.2546440000 | -0.8191840000 |
| B  | 0.7343300000  | -0.3239580000 | 3.0002460000  |
| B  | 0.7400690000  | -1.6612820000 | 2.1252670000  |
| B  | 0.6713620000  | 2.5477270000  | 1.8957180000  |
| B  | -1.3891300000 | 0.0360430000  | -0.0996620000 |
| B  | 1.1998230000  | -1.2695570000 | -2.0683960000 |

26

energy

|    |               |               |               |
|----|---------------|---------------|---------------|
| Al | 0.7710060000  | 2.2108860000  | 1.7112210000  |
| Al | 3.0134470000  | 1.7033240000  | -0.0511630000 |
| Al | 0.7763060000  | 1.3116000000  | -2.3819000000 |
| Al | 2.2468740000  | -0.1485810000 | 1.5994270000  |
| Al | -1.2319130000 | 2.1065610000  | -0.1961460000 |
| Al | 1.0718510000  | 3.4135530000  | -0.6621230000 |
| Al | 2.5805260000  | -0.5352400000 | -1.1469660000 |
| Al | 0.2262380000  | -2.8072130000 | -0.4404780000 |
| Al | -1.8854520000 | -1.9719590000 | -1.8349300000 |
| Al | -2.2130910000 | -1.9684890000 | 1.3365800000  |
| Al | -3.8202150000 | 1.3023750000  | -0.6951480000 |
| Al | -2.6355370000 | 0.6477010000  | 1.6821700000  |
| Al | -0.3728130000 | 0.0979020000  | 2.9072400000  |
| B  | 0.7156640000  | 0.6921160000  | -0.1079580000 |
| B  | -0.9878580000 | -0.1030380000 | -2.8112350000 |
| B  | 1.7872810000  | -2.3330360000 | 1.8652330000  |
| B  | 2.3955970000  | -2.5553070000 | 0.4045000000  |
| B  | 0.0236560000  | -1.7800900000 | 1.5137080000  |
| B  | -2.0213360000 | 0.5159780000  | -1.7227910000 |

|   |               |               |               |
|---|---------------|---------------|---------------|
| B | -2.0451600000 | -0.3452560000 | -0.2396620000 |
| B | 0.1870960000  | -1.1387420000 | -2.5856450000 |
| B | -0.4500600000 | -0.1296730000 | -1.1063040000 |
| B | -0.4860440000 | -0.4945550000 | 0.5525840000  |
| B | 2.2884920000  | -2.6923540000 | -1.1384570000 |
| B | 1.4374180000  | -2.0597890000 | -2.2591420000 |
| B | 0.9844660000  | -1.5185460000 | 2.8829300000  |

27

energy

|    |               |               |               |
|----|---------------|---------------|---------------|
| Al | -1.3803190000 | -2.3023730000 | -1.1732950000 |
| Al | 2.5896530000  | 1.1198060000  | -0.5580150000 |
| Al | 2.6533530000  | -2.1784890000 | 1.4589600000  |
| Al | 0.0748830000  | -1.6819460000 | 1.5059360000  |
| Al | -1.6362580000 | 1.9729940000  | 1.6323710000  |
| Al | -0.1370560000 | 2.7252520000  | -0.5538980000 |
| Al | -2.4973020000 | 1.6524630000  | -1.4245970000 |
| Al | 2.0630650000  | 0.1789680000  | 2.5180350000  |
| Al | 1.1666100000  | -2.7868250000 | -0.6470520000 |
| Al | 1.0599630000  | -0.4699370000 | -2.3966370000 |
| Al | 3.3070750000  | -1.2435240000 | -1.1723740000 |
| Al | -3.6997460000 | 0.2903170000  | 0.9518500000  |
| Al | -3.8991350000 | -2.0246040000 | -0.4143380000 |
| B  | 1.4642020000  | 2.3836880000  | 1.3669620000  |
| B  | -0.2929510000 | 0.3599560000  | 2.4932940000  |
| B  | -2.1338370000 | -1.4033530000 | 0.7822910000  |
| B  | -1.6150260000 | -0.3740470000 | 1.8917110000  |
| B  | -1.1620180000 | -0.1692340000 | -1.9220340000 |
| B  | 1.9660580000  | 3.1219230000  | 0.0308220000  |
| B  | 1.0719340000  | 1.9477940000  | -2.3971050000 |
| B  | 0.4620040000  | 1.7648040000  | 2.4225940000  |
| B  | 1.2562000000  | -0.5171920000 | -0.0210500000 |
| B  | 0.4954150000  | 0.8074360000  | 0.8667720000  |
| B  | -0.2463390000 | 0.4534810000  | -0.5927070000 |
| B  | -1.8898830000 | -0.2369260000 | -0.4379730000 |
| B  | -0.3660000000 | 1.2311110000  | -2.2629180000 |
| B  | 1.8617990000  | 2.9750950000  | -1.5107180000 |

28

energy

|    |               |               |               |
|----|---------------|---------------|---------------|
| Al | -1.9888910000 | 1.8505140000  | 0.9975830000  |
| Al | 0.4692840000  | 1.5003120000  | -2.5027280000 |
| Al | -2.4985400000 | 1.3441860000  | -1.8250290000 |
| Al | -0.9360640000 | -0.7635240000 | -2.3303290000 |
| Al | -0.6047210000 | -2.2587460000 | 1.2271230000  |
| Al | 2.1488520000  | -2.2047980000 | 0.4873230000  |
| Al | 1.2051670000  | -0.9539820000 | 2.9737160000  |
| Al | -2.8787640000 | -0.5212790000 | -0.1924020000 |
| Al | 1.0936870000  | 2.3929020000  | 0.0598520000  |
| Al | -0.9827080000 | 3.3742220000  | -1.1150550000 |
| Al | 3.5987840000  | 1.5464800000  | 1.1811710000  |
| Al | 2.1005780000  | -1.8319140000 | -2.2351800000 |
| Al | 2.7831890000  | 0.4136610000  | -1.1209250000 |
| B  | -2.1197760000 | -2.7089160000 | -0.4854390000 |
| B  | -2.7001830000 | -1.1960530000 | 1.9895760000  |
| B  | -2.7300670000 | -2.3351520000 | 0.8901410000  |
| B  | 1.5216690000  | 1.2167240000  | 1.9154050000  |
| B  | 0.1195940000  | 1.2052790000  | 2.7450840000  |
| B  | 1.8695820000  | -0.0669590000 | 0.8527480000  |
| B  | -1.0635130000 | -2.9736720000 | -1.6430830000 |
| B  | -0.5860920000 | 0.7050200000  | -0.4772420000 |
| B  | 0.7115450000  | -0.4890580000 | -0.4515540000 |
| B  | 0.1711530000  | 0.3662310000  | 1.0636310000  |
| B  | -0.9384670000 | -0.2726190000 | 2.2326270000  |
| B  | -2.5020500000 | 0.0748570000  | 2.8808780000  |
| B  | -1.4232760000 | 1.1585360000  | 3.1391550000  |
| B  | 0.3205190000  | -2.1013650000 | -0.8020170000 |
| B  | 0.2237430000  | -2.6917400000 | -2.4232220000 |

29

energy

|    |               |               |               |
|----|---------------|---------------|---------------|
| Al | -2.2925300000 | 1.8616040000  | 0.4896190000  |
| Al | -0.2059590000 | -2.1813540000 | 1.7791320000  |
| Al | -1.3594960000 | 1.0561460000  | 2.7181180000  |
| Al | 1.1952060000  | 0.1065590000  | 2.3784740000  |
| Al | -0.5845420000 | 0.8789780000  | -1.8010660000 |
| Al | 2.2822120000  | -0.2007300000 | -2.1084460000 |
| Al | 0.3469780000  | 2.3504730000  | 1.0885960000  |
| Al | -2.5430160000 | -1.1254620000 | 1.6746000000  |
| Al | 2.0305920000  | -3.5817380000 | 0.5251400000  |
| Al | 3.0479840000  | 1.2693350000  | 0.5644000000  |
| Al | 3.1588990000  | -1.2554630000 | 0.5398020000  |
| Al | 2.4387510000  | 3.5496830000  | -0.4179170000 |
| Al | 0.1277040000  | -2.0978020000 | -2.7424250000 |
| B  | -1.0118250000 | 2.9837130000  | -1.3614140000 |
| B  | -3.0431200000 | -0.4481320000 | -1.2723580000 |
| B  | -2.3638150000 | 2.3370160000  | -1.6466260000 |
| B  | 0.2769010000  | -2.8511080000 | -0.4336620000 |
| B  | -1.2614140000 | -2.5898410000 | -0.9316840000 |
| B  | 1.3950060000  | -1.6015000000 | -0.6635920000 |
| B  | -0.4556890000 | 0.0231150000  | 0.8638970000  |
| B  | 1.0100090000  | 0.0525240000  | -0.0944700000 |
| B  | -0.3400220000 | -1.1279040000 | -0.3697750000 |
| B  | -1.5562130000 | -1.0902550000 | -1.7260850000 |
| B  | -3.9526790000 | -1.2143540000 | -0.0442750000 |
| B  | -2.7721030000 | -2.0764360000 | -0.6409220000 |
| B  | 1.4288090000  | 1.4559220000  | -1.0549780000 |
| B  | 0.5635990000  | 2.9175210000  | -1.0817810000 |
| B  | -4.2687440000 | 0.2940470000  | -0.4153910000 |
| B  | -3.5199400000 | 1.2970760000  | -1.3157540000 |

15  
energy

|    |               |               |               |
|----|---------------|---------------|---------------|
| Al | -0.1727960000 | 0.0011730000  | 2.6078730000  |
| Al | 2.3700760000  | -0.0009020000 | 1.7608720000  |
| Al | 2.8321400000  | 1.4608820000  | -0.5333920000 |
| Al | 2.8303020000  | -1.4617030000 | -0.5346050000 |
| Al | 0.4870040000  | -1.3438590000 | -1.9563060000 |
| Al | 0.3745860000  | -1.9692720000 | 0.7809630000  |
| Al | -1.6719900000 | -2.4053070000 | -0.8668220000 |
| Al | -1.6685750000 | 2.4066770000  | -0.8698170000 |
| Al | 0.4894350000  | 1.3400120000  | -1.9571410000 |
| Al | -2.1967160000 | 1.3283360000  | 1.3915950000  |
| Al | -1.9866100000 | 0.0003380000  | -1.9471740000 |
| Al | -2.1974760000 | -1.3244750000 | 1.3936590000  |
| Al | 0.3763470000  | 1.9684430000  | 0.7794090000  |
| B  | -0.6761930000 | -0.0000040000 | -0.0406450000 |
| B  | 1.0253080000  | -0.0008830000 | -0.0870500000 |

16  
energy

|    |               |               |               |
|----|---------------|---------------|---------------|
| Al | 2.2398470000  | -2.1273400000 | -0.0097550000 |
| Al | 2.3987960000  | -0.3666880000 | 1.9394640000  |
| Al | 0.0011990000  | -1.7238310000 | 1.5247660000  |
| Al | -0.0016120000 | 1.0645040000  | 2.2140150000  |
| Al | -2.3983220000 | -0.3718480000 | 1.9409840000  |
| Al | -2.2374540000 | -2.1281760000 | -0.0119860000 |
| Al | -0.0043050000 | 3.4490190000  | 0.0087490000  |
| Al | -2.1407770000 | 1.6078000000  | 0.0108490000  |
| Al | 2.1369670000  | 1.6138670000  | 0.0107730000  |
| Al | -2.3965070000 | -0.3489220000 | -1.9442630000 |
| Al | 2.3998320000  | -0.3455240000 | -1.9403680000 |
| Al | -0.0001100000 | 1.0865570000  | -2.2030310000 |
| Al | 0.0023630000  | -1.7088500000 | -1.5419010000 |
| B  | 0.8741930000  | -0.2311990000 | -0.0006410000 |
| B  | -0.0009610000 | 1.2425350000  | 0.0064820000  |
| B  | -0.8730150000 | -0.2328090000 | -0.0014140000 |

17  
energy

|    |               |               |               |
|----|---------------|---------------|---------------|
| Al | -2.2122180000 | 0.4126220000  | 1.3525500000  |
| Al | -0.0009410000 | -0.6696250000 | 2.5859080000  |
| Al | 0.0003900000  | 1.8344270000  | 1.6267910000  |
| Al | 1.3112670000  | 2.1362660000  | -0.8251640000 |
| Al | -3.3615320000 | -1.4235400000 | -0.8746910000 |
| Al | -3.6858900000 | 1.1401050000  | -0.7844150000 |
| Al | -1.3119920000 | 2.1352610000  | -0.8246320000 |
| Al | 2.2129330000  | 0.4134290000  | 1.3540870000  |
| Al | 3.6847280000  | 1.1406930000  | -0.7821890000 |
| Al | 1.3106290000  | -2.0344770000 | 0.5989520000  |
| Al | 3.3594720000  | -1.4238100000 | -0.8788170000 |
| Al | 0.0033020000  | -1.6692800000 | -1.8509280000 |
| Al | -1.3091110000 | -2.0352340000 | 0.5970950000  |
| B  | 0.0000090000  | 0.5011980000  | -1.5322150000 |
| B  | -0.0020080000 | -0.1501730000 | 0.1380010000  |
| B  | -1.4317730000 | -0.1206630000 | -0.9886150000 |
| B  | 1.4310760000  | -0.1181380000 | -0.9829940000 |

18

energy

|    |               |               |               |
|----|---------------|---------------|---------------|
| Al | -0.4067160000 | 3.1547630000  | -0.6203240000 |
| Al | -0.1239510000 | -0.0669580000 | 3.2457040000  |
| Al | -1.6059400000 | 1.0529650000  | 1.3074600000  |
| Al | -1.1452530000 | -1.5901080000 | 1.1237160000  |
| Al | -1.7517220000 | -2.4004020000 | -1.3447590000 |
| Al | -3.7904070000 | -0.9468000000 | -0.2616590000 |
| Al | 3.2386830000  | -2.0447700000 | -0.5848990000 |
| Al | 0.7887500000  | -2.7203540000 | -0.9829220000 |
| Al | 1.4750550000  | -1.2139520000 | 1.3770630000  |
| Al | 2.1490850000  | 2.7607590000  | -1.0182260000 |
| Al | 3.2350280000  | 0.5394760000  | -0.3576440000 |
| Al | 1.0217860000  | 1.4595910000  | 1.2814070000  |
| Al | -2.9195620000 | 1.7267740000  | -0.9173370000 |
| B  | -1.8161730000 | -0.2196680000 | -1.0627510000 |
| B  | -0.1238880000 | -0.4463080000 | -1.2666990000 |
| B  | 1.5109340000  | -0.6057380000 | -1.1101270000 |
| B  | 0.8195940000  | 0.9458970000  | -1.1577670000 |
| B  | -0.8190360000 | 1.0772610000  | -1.2463620000 |

19

energy

|    |               |               |               |
|----|---------------|---------------|---------------|
| Al | -1.0392120000 | -1.2869630000 | 1.2525730000  |
| Al | -1.3068010000 | -3.0623210000 | -1.1300660000 |
| Al | 1.6356690000  | -0.2562790000 | 1.2527210000  |
| Al | -3.3636850000 | -2.0351800000 | -0.0445700000 |
| Al | 3.4440820000  | -1.8960090000 | -0.0473320000 |
| Al | 1.0980930000  | -2.8485110000 | -0.2715370000 |
| Al | 0.0013510000  | -0.0006580000 | 3.3613240000  |
| Al | 3.3055150000  | 0.3997590000  | -1.1301940000 |
| Al | -0.5947300000 | 1.5424600000  | 1.2516840000  |
| Al | -1.9994170000 | 2.6635970000  | -1.1293810000 |
| Al | 1.9179110000  | 2.3763530000  | -0.2727480000 |
| Al | -0.0807490000 | 3.9303760000  | -0.0440110000 |
| Al | -3.0170870000 | 0.4728820000  | -0.2727940000 |
| B  | 0.0008140000  | -1.0665130000 | -1.2299700000 |
| B  | -1.6284040000 | -0.9274260000 | -1.1769980000 |
| B  | 1.6167610000  | -0.9460140000 | -1.1765080000 |
| B  | 0.9225750000  | 0.5347140000  | -1.2285360000 |
| B  | -0.9246580000 | 0.5324110000  | -1.2281520000 |
| B  | 0.0104690000  | 1.8741130000  | -1.1765790000 |

20

energy

|    |               |               |               |
|----|---------------|---------------|---------------|
| Al | -0.0560720000 | 1.6066700000  | 1.1417650000  |
| Al | 1.3800530000  | -0.8562110000 | 1.1591930000  |
| Al | -2.7800290000 | 1.4092230000  | -0.0361630000 |
| Al | -0.0007160000 | 0.0249990000  | 3.2706880000  |
| Al | -1.4589610000 | -0.9235010000 | 1.2439860000  |
| Al | -2.4667580000 | -2.4441660000 | -0.9783650000 |
| Al | 1.2473540000  | 3.7899080000  | -0.1727730000 |

|    |               |               |               |
|----|---------------|---------------|---------------|
| Al | 2.6018690000  | -2.7355250000 | -0.6564100000 |
| Al | 4.1575680000  | -0.6038870000 | 0.1960810000  |
| Al | 2.4396180000  | 1.4827080000  | -0.5851590000 |
| Al | -4.0668820000 | -0.7966160000 | 0.1466280000  |
| Al | -0.0478580000 | -2.9670010000 | -0.2482010000 |
| Al | -1.1957780000 | 3.1851990000  | -1.0066940000 |
| B  | 0.3881700000  | 1.8190290000  | -1.2423280000 |
| B  | 2.2219780000  | -0.5983380000 | -1.0730220000 |
| B  | -2.0970390000 | -0.3222040000 | -1.1296680000 |
| B  | -0.6232470000 | -0.9405840000 | -1.4259240000 |
| B  | -0.9140580000 | 0.8152140000  | -1.2920850000 |
| B  | 0.7626840000  | 0.2223750000  | -1.4120120000 |
| B  | 0.9026570000  | -1.4421700000 | -1.4588600000 |

21

energy

|    |               |               |               |
|----|---------------|---------------|---------------|
| Al | -3.9209430000 | -1.7011730000 | 0.1841520000  |
| Al | -1.6702800000 | 2.6729050000  | 0.1083400000  |
| Al | 2.9587740000  | 2.8275020000  | 0.0851380000  |
| Al | -3.8334620000 | 1.0306000000  | -0.3455440000 |
| Al | 0.6280940000  | 3.5967700000  | -1.0356090000 |
| Al | 1.1222900000  | -3.5645070000 | -0.9517960000 |
| Al | 0.1129300000  | -0.0470650000 | 3.2098440000  |
| Al | 0.7869260000  | -1.4713780000 | 1.0329590000  |
| Al | -1.6666720000 | -0.1019580000 | 1.2195540000  |
| Al | -1.4093380000 | -2.4344470000 | -0.5970060000 |
| Al | 3.3957750000  | -2.5263690000 | 0.3405310000  |
| Al | 0.6995950000  | 1.4861460000  | 1.1372250000  |
| Al | 3.0000050000  | 0.2555830000  | -0.3922800000 |
| B  | -2.4144120000 | -0.5111310000 | -1.0230460000 |
| B  | -1.7510350000 | 0.9429480000  | -1.3152040000 |
| B  | -0.7735650000 | -0.3797610000 | -1.5350020000 |
| B  | 0.9914200000  | -0.0173160000 | -1.3842830000 |
| B  | -0.1908700000 | 1.3202470000  | -1.3671320000 |
| B  | 1.3953400000  | 1.5819160000  | -1.1471410000 |
| B  | 0.3445340000  | -1.5531270000 | -1.5645850000 |
| B  | 1.8689880000  | -1.4425590000 | -1.0519220000 |

22

energy

|    |               |               |               |
|----|---------------|---------------|---------------|
| Al | 3.1108030000  | 2.4991320000  | 0.2317820000  |
| Al | 0.7768080000  | 1.7260020000  | -1.1670720000 |
| Al | -1.5249680000 | 0.1094850000  | -1.5129230000 |
| Al | -1.4622310000 | 3.0404090000  | -0.4317190000 |
| Al | -4.1331520000 | -0.9073960000 | -0.9325670000 |
| Al | 0.2209760000  | -1.7440010000 | -0.9928640000 |
| Al | 1.6908980000  | -3.5020900000 | 0.3164500000  |
| Al | -2.4980940000 | -2.3700920000 | 0.4946970000  |
| Al | -0.3833790000 | -3.0705170000 | 1.8516350000  |
| Al | 3.3199780000  | 0.1084940000  | -0.7679190000 |
| Al | 3.1327670000  | -2.3501480000 | -1.3887670000 |
| Al | 0.8945230000  | 4.1063820000  | 0.9523910000  |
| Al | -3.5265020000 | 1.4585770000  | -0.1865710000 |
| B  | 1.8272470000  | 0.2053900000  | 1.0067460000  |
| B  | 1.3021460000  | 1.7743900000  | 1.1856190000  |
| B  | -0.2763690000 | 2.1291920000  | 1.2256670000  |
| B  | 0.2039770000  | 0.5569360000  | 1.4080790000  |
| B  | -0.9172250000 | -0.7186920000 | 0.9532800000  |
| B  | -1.4427010000 | 0.9986170000  | 0.9714660000  |
| B  | -2.4685940000 | -0.2207540000 | 0.7035530000  |
| B  | 2.0827360000  | -1.3034520000 | 0.4100470000  |
| B  | 0.6808760000  | -1.0926440000 | 1.3225060000  |

14

energy

|    |               |               |               |
|----|---------------|---------------|---------------|
| Al | -0.7840060000 | -1.3880250000 | -2.3096940000 |
| Al | -2.6363610000 | -1.2769660000 | -0.1872000000 |
| Al | 1.6658750000  | -1.5011390000 | -1.1561360000 |
| Al | 1.5248180000  | -1.1151530000 | 1.6485840000  |
| Al | -1.2167900000 | -1.1787840000 | 2.3138040000  |

|    |               |               |               |
|----|---------------|---------------|---------------|
| Al | -0.3616520000 | -2.7132440000 | 0.2269260000  |
| Al | 3.9174860000  | 0.0011510000  | 0.0003970000  |
| Al | -0.2941640000 | 0.0001240000  | 0.0002460000  |
| Al | -0.3631260000 | 2.7127500000  | -0.2267990000 |
| Al | -1.2179480000 | 1.1803270000  | -2.3139110000 |
| Al | -0.7857600000 | 1.3907450000  | 2.3096840000  |
| Al | 1.6648640000  | 1.5010560000  | 1.1562050000  |
| Al | -2.6374360000 | 1.2725340000  | 0.1870100000  |
| Al | 1.5241980000  | 1.1146240000  | -1.6491150000 |

15

energy

|    |               |               |               |
|----|---------------|---------------|---------------|
| Al | -0.7773700000 | 2.1837740000  | -0.0002400000 |
| Al | 1.8835670000  | 2.2784560000  | -0.0003980000 |
| Al | -1.4921480000 | 0.0016080000  | -1.3984960000 |
| Al | 0.6108860000  | 1.3875380000  | -2.1916340000 |
| Al | 0.6108030000  | 1.3882010000  | 2.1912180000  |
| Al | 2.6668430000  | -0.0032860000 | -1.2828930000 |
| Al | -1.4922360000 | 0.0018850000  | 1.3986040000  |
| Al | 0.6078190000  | -1.3883720000 | 2.1943020000  |
| Al | 2.6669140000  | -0.0024730000 | 1.2824870000  |
| Al | 0.6074730000  | -1.3893730000 | -2.1937220000 |
| Al | 1.8761470000  | -2.2791190000 | 0.0004770000  |
| Al | -3.5980420000 | 1.4491370000  | -0.0001390000 |
| Al | -3.5985020000 | -1.4460800000 | -0.0000400000 |
| Al | -0.7818490000 | -2.1813480000 | 0.0004760000  |
| B  | 0.5452070000  | -0.0014240000 | -0.0000040000 |

24

energy

|    |               |               |               |
|----|---------------|---------------|---------------|
| Al | 2.5358520000  | 0.1937580000  | 1.5769260000  |
| Al | 0.0605920000  | 1.2658180000  | 1.2594190000  |
| Al | -2.5721510000 | 2.4303110000  | 0.4920560000  |
| Al | -2.3697750000 | -0.1308440000 | 1.4672700000  |
| Al | -4.4653770000 | -1.8607760000 | 0.3970000000  |
| Al | -4.6533010000 | 0.8300580000  | -0.3672480000 |
| Al | -1.9113970000 | -2.4267850000 | -0.2253080000 |
| Al | 0.2414780000  | -1.4590630000 | 1.3504040000  |
| Al | -0.3098580000 | 3.4784860000  | -0.2105960000 |
| Al | 4.7397650000  | -0.9660580000 | 0.4687830000  |
| Al | 2.1269950000  | 2.7586650000  | 0.0743920000  |
| Al | 4.1030380000  | 1.2333940000  | -0.8712910000 |
| Al | 0.4599020000  | -3.2734010000 | -0.8202160000 |
| Al | 2.6774590000  | -2.4380360000 | 0.2046840000  |
| B  | -3.0167310000 | -0.6260370000 | -0.7655800000 |
| B  | -1.0227930000 | 1.4007070000  | -1.3739640000 |
| B  | 0.5407150000  | 1.7676740000  | -1.4113910000 |
| B  | 1.7424640000  | 0.7015260000  | -1.0721720000 |
| B  | 0.1504340000  | 0.1854610000  | -1.6735100000 |
| B  | -0.2084420000 | -1.4151490000 | -1.6735940000 |
| B  | 2.7990040000  | -0.5146550000 | -0.7756010000 |
| B  | 1.2976310000  | -1.0545430000 | -1.1859390000 |
| B  | -1.4494370000 | -0.3773090000 | -1.3861770000 |
| B  | -2.5572240000 | 0.8799570000  | -1.1523890000 |

25

energy

|    |               |               |               |
|----|---------------|---------------|---------------|
| Al | 1.4738590000  | 2.0001350000  | -1.2667520000 |
| Al | 1.8970640000  | -2.0870680000 | -1.2755350000 |
| Al | 3.6378930000  | -0.2396350000 | 0.4398510000  |
| Al | 1.7705960000  | -1.2225640000 | 1.9051890000  |
| Al | -1.8506720000 | -1.5062400000 | 1.6859090000  |
| Al | -2.3065940000 | 1.4954660000  | 1.2170570000  |
| Al | 2.0085200000  | 1.5814790000  | 1.4420580000  |
| Al | 0.0847530000  | -0.0387290000 | -2.5991140000 |
| Al | 3.0107770000  | 0.0784670000  | -2.1042230000 |
| Al | -3.3475190000 | -1.4695510000 | -0.4090980000 |
| Al | -1.2559000000 | 2.0331140000  | -1.5409370000 |
| Al | -0.0547680000 | 3.3805290000  | 0.5511230000  |
| Al | -3.5319780000 | 0.9681500000  | -1.0120630000 |

|    |               |               |               |
|----|---------------|---------------|---------------|
| Al | -1.2840490000 | -2.1883340000 | -1.9080530000 |
| B  | 0.0569040000  | -2.9298090000 | 1.0640710000  |
| B  | 0.6138720000  | 0.5284740000  | 2.8703220000  |
| B  | -0.1830700000 | 1.6019040000  | 1.8709660000  |
| B  | -1.4571080000 | -0.1537510000 | -0.5101870000 |
| B  | -0.0031280000 | -2.3599180000 | 2.5048360000  |
| B  | 1.4060750000  | -0.0711630000 | -0.2166830000 |
| B  | -0.0266020000 | -1.0727070000 | -0.2797910000 |
| B  | -0.1005450000 | 0.6432250000  | 0.1225950000  |
| B  | -0.0852000000 | -0.9096050000 | 3.1405190000  |
| B  | -1.0021110000 | 0.3767860000  | 2.6081170000  |
| B  | 0.1257540000  | -2.8950040000 | -0.5008330000 |

26

energy

|    |               |               |               |
|----|---------------|---------------|---------------|
| Al | -0.5854340000 | -2.6407840000 | 0.3184220000  |
| Al | -2.3483540000 | 0.1126500000  | -2.2302170000 |
| Al | -3.2720000000 | -1.4375610000 | 0.7665700000  |
| Al | -2.6542510000 | 0.9783800000  | 1.2083860000  |
| Al | 0.2395500000  | 2.4165250000  | 1.0004980000  |
| Al | 0.7326580000  | 2.9817400000  | -1.7157570000 |
| Al | 2.4927060000  | 1.0843240000  | 1.3279300000  |
| Al | -1.1374880000 | -0.9683070000 | 2.3752350000  |
| Al | 0.1586820000  | -1.2242460000 | -2.0092860000 |
| Al | -2.3276590000 | -2.4069020000 | -1.6487710000 |
| Al | 3.3777260000  | 1.0827510000  | -1.3664330000 |
| Al | 2.0855530000  | -2.7647810000 | -0.5778120000 |
| Al | 1.5732420000  | -1.4076150000 | 1.9130890000  |
| Al | 3.8436530000  | -1.1069940000 | 0.4523240000  |
| B  | -1.3389750000 | 2.0045220000  | -2.0981570000 |
| B  | -0.7735710000 | 1.2493600000  | 2.7039840000  |
| B  | -1.5475040000 | 2.5481200000  | 2.2878700000  |
| B  | 0.5537060000  | 0.4750480000  | 2.1155570000  |
| B  | -0.1420000000 | 0.9638780000  | -2.4242090000 |
| B  | 1.0798160000  | 0.7049540000  | -1.3428120000 |
| B  | -1.5957950000 | 2.6563640000  | -0.6570700000 |
| B  | -1.3597840000 | -0.4937510000 | -0.0861140000 |
| B  | -0.6872070000 | 1.0460650000  | -0.7303370000 |
| B  | 0.2583930000  | 0.0590080000  | 0.3619520000  |
| B  | -1.9056490000 | 3.0473100000  | 0.8665830000  |
| B  | 1.7942550000  | -0.4787470000 | -0.5141130000 |

27

energy

|    |               |               |               |
|----|---------------|---------------|---------------|
| Al | 1.4147900000  | 1.9236600000  | 1.7508560000  |
| Al | 3.3721430000  | 1.2080280000  | -0.2865880000 |
| Al | 1.0162810000  | 1.3903880000  | -2.4848590000 |
| Al | 2.4420890000  | -0.5901040000 | 1.4128420000  |
| Al | -0.6435260000 | 2.2861450000  | -0.0155990000 |
| Al | 1.7477050000  | 3.2971900000  | -0.5772450000 |
| Al | 2.4925400000  | -0.9107290000 | -1.3935650000 |
| Al | -0.1262860000 | -2.6038700000 | -0.5646070000 |
| Al | -2.2251070000 | -1.5146700000 | -1.8534090000 |
| Al | -2.0285790000 | -1.7253560000 | 1.3428580000  |
| Al | -3.2470150000 | 2.1934340000  | -0.3518020000 |
| Al | -3.9753810000 | -0.4473420000 | -0.0863010000 |
| Al | -2.0581090000 | 0.9662170000  | 1.9537250000  |
| Al | 0.1088020000  | -0.0260730000 | 3.1218600000  |
| B  | 1.1035860000  | 0.6281390000  | -0.2278640000 |
| B  | -0.9160500000 | 0.1756000000  | -2.7494100000 |
| B  | 1.7371480000  | -2.6875090000 | 1.7515410000  |
| B  | 2.0844150000  | -2.9584120000 | 0.2295640000  |
| B  | 0.2056300000  | -1.7240180000 | 1.4657830000  |
| B  | -1.7741450000 | 0.8594090000  | -1.5436930000 |
| B  | -1.7046530000 | 0.0799820000  | -0.0501780000 |
| B  | -0.0001360000 | -1.1230950000 | -2.6199840000 |
| B  | -0.2681020000 | -0.0318410000 | -1.1041550000 |
| B  | -0.1566020000 | -0.3054210000 | 0.6030000000  |
| B  | 1.8741020000  | -3.0137990000 | -1.3184610000 |

|   |              |               |               |
|---|--------------|---------------|---------------|
| B | 1.1243210000 | -2.2486310000 | -2.4289790000 |
| B | 1.1355790000 | -1.8123910000 | 2.8756040000  |

28

energy

|    |               |               |               |
|----|---------------|---------------|---------------|
| Al | -1.6474280000 | -2.4536870000 | -0.1376110000 |
| Al | -0.9196230000 | 2.1671590000  | 1.3376890000  |
| Al | -1.6705240000 | -1.8944570000 | 2.3083220000  |
| Al | 0.6827650000  | 0.2865330000  | 2.6734260000  |
| Al | 0.4329730000  | -1.1971970000 | -2.2568990000 |
| Al | 2.2330680000  | 0.7845720000  | -1.8381050000 |
| Al | 0.7845640000  | -2.0437190000 | 1.3751830000  |
| Al | -2.9497470000 | -0.0153040000 | 0.5755550000  |
| Al | -2.0082060000 | 0.6050970000  | 3.0778460000  |
| Al | 0.2807440000  | 4.1492440000  | -0.2763530000 |
| Al | 3.3490290000  | 0.3442320000  | 0.6331580000  |
| Al | -0.3243890000 | 1.4420480000  | -3.0387160000 |
| Al | 1.8478420000  | 2.3632160000  | 0.8766360000  |
| Al | 3.6567270000  | -2.2248070000 | 0.4343970000  |
| B  | 0.5252640000  | -3.1871600000 | -1.1474930000 |
| B  | -3.1099430000 | -1.0421210000 | -2.0810150000 |
| B  | -0.7360080000 | -3.0032460000 | -2.0166640000 |
| B  | -0.9889420000 | 2.4851080000  | -0.9123480000 |
| B  | -2.2152630000 | 1.5772210000  | -1.4581420000 |
| B  | 0.5726600000  | 1.8095820000  | -0.8276420000 |
| B  | -0.6738770000 | -0.2167070000 | 0.8389010000  |
| B  | 0.8646490000  | 0.2807830000  | 0.1036160000  |
| B  | -0.7737030000 | 0.6781910000  | -0.6582470000 |
| B  | -1.6419130000 | -0.1090280000 | -1.9905940000 |
| B  | -3.3020420000 | 0.4281530000  | -1.6052530000 |
| B  | 1.8874110000  | -0.9618440000 | -0.4596340000 |
| B  | 1.8382570000  | -2.6665240000 | -0.4177000000 |
| B  | -1.9908170000 | -2.0860270000 | -2.3035580000 |

29

energy

|    |               |               |               |
|----|---------------|---------------|---------------|
| Al | 0.7929410000  | 1.6672630000  | 2.7612470000  |
| Al | 2.2474790000  | -1.9625910000 | 0.5927670000  |
| Al | 3.1169800000  | 0.9780200000  | 1.3523000000  |
| Al | 2.7574920000  | 0.2314390000  | -1.0290240000 |
| Al | 0.1952700000  | -0.3931200000 | -2.5066210000 |
| Al | -1.8213510000 | -2.1103390000 | -1.6521830000 |
| Al | -2.3023120000 | 0.8257190000  | -1.6871770000 |
| Al | 1.1159540000  | 2.4153310000  | 0.1790440000  |
| Al | -0.5485560000 | -0.7574880000 | 2.4343430000  |
| Al | 1.9940840000  | -0.8167360000 | 3.0029020000  |
| Al | -3.1856460000 | -0.7219880000 | 2.1466590000  |
| Al | -1.8676280000 | 1.6528680000  | 1.3380660000  |
| Al | -1.5774070000 | 3.4052220000  | -0.8331900000 |
| Al | -3.8921620000 | -1.0523350000 | -0.3878850000 |
| B  | -0.5271150000 | -2.8909280000 | 0.1960800000  |
| B  | 1.2694390000  | 2.2533230000  | -2.4770070000 |
| B  | 2.0136680000  | 0.9327500000  | -2.9816150000 |
| B  | -0.2302670000 | 1.6114720000  | -1.6101430000 |
| B  | -1.6071160000 | -1.8313750000 | 0.8197190000  |
| B  | -1.7258870000 | -0.2764730000 | 0.1621310000  |
| B  | 0.4556420000  | -2.1371280000 | -1.1363440000 |
| B  | 1.0502420000  | 0.0941450000  | 0.6923030000  |
| B  | -0.1052020000 | -1.0406480000 | 0.0752980000  |
| B  | -0.3759430000 | 0.6885440000  | -0.1933190000 |
| B  | 2.3393640000  | -0.5678000000 | -2.9679280000 |
| B  | 2.2192910000  | -1.9062730000 | -2.1051590000 |
| B  | 1.8766720000  | -3.1959120000 | -1.2894700000 |
| B  | 0.3415290000  | 3.2041890000  | -1.6912410000 |
| B  | 0.7403250000  | -3.6771730000 | -0.3425480000 |

30

energy

|    |               |               |              |
|----|---------------|---------------|--------------|
| Al | 3.0344390000  | 0.4692730000  | 0.0309490000 |
| Al | -0.6499890000 | -1.5921710000 | 2.1558870000 |

|    |               |               |               |
|----|---------------|---------------|---------------|
| Al | 2.3330640000  | 0.5234110000  | 2.4694460000  |
| Al | -0.2695820000 | 1.2115650000  | 2.5916310000  |
| Al | 1.8799020000  | -2.0797840000 | 1.7429220000  |
| Al | 0.8212980000  | 0.2737870000  | -1.9893820000 |
| Al | -2.1448740000 | 0.8543020000  | -1.7989100000 |
| Al | -1.2889750000 | -2.0463840000 | -2.2873850000 |
| Al | 1.1818630000  | 2.4129270000  | 0.7263630000  |
| Al | -3.4119180000 | -1.7110710000 | 1.2859680000  |
| Al | -1.7236920000 | 2.9241140000  | 0.4585840000  |
| Al | -3.6894060000 | -1.4578100000 | -1.4470470000 |
| Al | -2.6875100000 | 0.7857820000  | 1.4577390000  |
| Al | -0.0398110000 | 4.3049920000  | -0.9169430000 |
| B  | 2.3116060000  | -2.1319090000 | -1.2516080000 |
| B  | 3.1465950000  | 0.4842060000  | -2.1390820000 |
| B  | -0.1966700000 | -2.8466780000 | -0.3807320000 |
| B  | 0.7497620000  | -0.0159060000 | 0.9254460000  |
| B  | -0.0701230000 | -1.0473630000 | -0.1423540000 |
| B  | 0.6783890000  | -1.8734460000 | -1.5554220000 |
| B  | 2.8710640000  | -3.1601070000 | 0.0016110000  |
| B  | 1.3506110000  | -3.3218320000 | -0.2664740000 |
| B  | 3.8604080000  | -2.0958150000 | -0.6248870000 |
| B  | 3.6098920000  | -0.9513580000 | -1.6271100000 |
| B  | -1.5991500000 | -2.1832120000 | 0.1549700000  |
| B  | -1.8366130000 | -0.5427820000 | -0.1476570000 |
| B  | -0.6135000000 | 0.6576520000  | 0.0381570000  |
| B  | -0.4207930000 | 1.9379500000  | -1.1699100000 |
| B  | 1.0736400000  | 2.6302930000  | -1.5426200000 |
| B  | 2.3883740000  | 1.7906820000  | -1.9198650000 |

16

energy

|    |               |               |               |
|----|---------------|---------------|---------------|
| Al | 2.2802250000  | 1.7369450000  | 1.4072200000  |
| Al | 0.1301350000  | 0.5333740000  | 2.3711920000  |
| Al | -2.3514760000 | 0.5921290000  | 1.4678390000  |
| Al | 2.4265470000  | -0.8314920000 | 1.8492950000  |
| Al | -2.3669710000 | -1.5985910000 | -0.2231570000 |
| Al | 0.0127740000  | -1.6760850000 | -1.5510780000 |
| Al | -2.3613740000 | 0.9721490000  | -1.2612640000 |
| Al | -0.0277930000 | -1.8695460000 | 1.2226800000  |
| Al | 2.2360990000  | 2.0053010000  | -1.1449000000 |
| Al | 0.1091770000  | 0.8900320000  | -2.2322620000 |
| Al | -0.0990870000 | 2.1426480000  | 0.1935230000  |
| Al | 2.4689710000  | -0.4828790000 | -1.9119970000 |
| Al | 2.1693980000  | -2.4175600000 | -0.1900060000 |
| Al | -4.7493190000 | 0.0164660000  | 0.0114790000  |
| B  | -0.6889860000 | -0.0312200000 | -0.0201010000 |
| B  | 1.0079910000  | -0.0022960000 | -0.0021670000 |

17

energy

|    |               |               |               |
|----|---------------|---------------|---------------|
| Al | -2.3772960000 | -1.4220200000 | -1.7791830000 |
| Al | -2.2357160000 | 0.3547960000  | 1.7678520000  |
| Al | -0.0026400000 | -2.4693360000 | -0.7823230000 |
| Al | -2.6242650000 | -2.1092650000 | 0.7722530000  |
| Al | -0.1808060000 | -1.6252110000 | 1.8780310000  |
| Al | -1.1825760000 | 2.8788430000  | 0.9769100000  |
| Al | -0.0091190000 | 0.0418490000  | -2.2391960000 |
| Al | -2.4358150000 | 1.0891070000  | -0.9347230000 |
| Al | 1.8094940000  | 1.4355330000  | -0.3089670000 |
| Al | 0.4076230000  | 1.0190920000  | 2.1689240000  |
| Al | 2.3882200000  | -0.7918400000 | 1.4631220000  |
| Al | 2.3769790000  | -1.1034970000 | -1.3456560000 |
| Al | -0.2988850000 | 2.7354300000  | -1.5362240000 |
| Al | 4.6417700000  | -0.0075910000 | -0.0404710000 |
| B  | -1.0306220000 | -0.5931940000 | -0.1061330000 |
| B  | 0.6693080000  | -0.4399010000 | 0.0096950000  |
| B  | -0.3588030000 | 0.9657790000  | -0.0604730000 |

18

energy

|    |               |               |               |
|----|---------------|---------------|---------------|
| Al | 0.1206720000  | -1.2705000000 | -2.1392830000 |
| Al | -2.0216430000 | -0.6590510000 | 1.5549920000  |
| Al | 0.6670050000  | -1.1467690000 | 2.1561010000  |
| Al | -0.0900130000 | -3.1086500000 | 0.4289660000  |
| Al | -2.1518050000 | -2.2812920000 | -0.8010370000 |
| Al | 2.1955330000  | -2.0881560000 | -0.4012060000 |
| Al | 2.4495370000  | 0.7427250000  | 1.9022000000  |
| Al | -0.3063210000 | 1.4100930000  | 1.5102460000  |
| Al | 3.6302120000  | 0.0711010000  | -0.3477910000 |
| Al | -0.8806420000 | 2.9510110000  | -0.8531310000 |
| Al | 1.8408930000  | 0.6995420000  | -2.1571190000 |
| Al | -3.7956310000 | -0.2714120000 | -0.5112140000 |
| Al | 1.6793850000  | 2.5495690000  | -0.0734880000 |
| Al | -3.1171560000 | 2.0648060000  | 0.1934350000  |
| B  | -0.3570640000 | -0.5885410000 | 0.0766260000  |
| B  | 1.2637700000  | 0.0402690000  | 0.0190050000  |
| B  | -1.5225930000 | 0.5854690000  | -0.4215600000 |
| B  | 0.0438210000  | 0.8389590000  | -0.8744180000 |

19

energy

|    |               |               |               |
|----|---------------|---------------|---------------|
| Al | -1.3487110000 | -2.3237490000 | -1.0785710000 |
| Al | 0.0475640000  | -0.2532260000 | 3.1586550000  |
| Al | -1.9170630000 | -0.9594440000 | 1.5674560000  |
| Al | -0.4158770000 | 1.3381260000  | 1.0577820000  |
| Al | -0.0273750000 | 3.3612580000  | -0.7952000000 |
| Al | -2.5272720000 | 3.1434500000  | -0.3043020000 |
| Al | 4.1288560000  | 0.5308010000  | -0.2722400000 |
| Al | 2.2014420000  | 2.1959250000  | -0.5533090000 |
| Al | 2.0958980000  | 0.2665270000  | 1.5868520000  |
| Al | 1.0288670000  | -3.0514190000 | -1.5420610000 |
| Al | 2.8619500000  | -1.6728500000 | -0.4720880000 |
| Al | 0.5007200000  | -1.8302750000 | 0.9357680000  |
| Al | -3.0139100000 | 0.5758830000  | -0.7617630000 |
| Al | -3.8384720000 | -1.8720310000 | -0.1150670000 |
| B  | -1.1239200000 | 1.5143610000  | -1.1737810000 |
| B  | 0.3955910000  | 0.8132980000  | -1.3074720000 |
| B  | 1.8440120000  | 0.1205860000  | -1.0954400000 |
| B  | 0.4793650000  | -0.8881630000 | -1.3677190000 |
| B  | -1.0142540000 | -0.1274200000 | -1.3265520000 |

20

energy

|    |               |               |               |
|----|---------------|---------------|---------------|
| Al | 0.0214670000  | -0.1303350000 | 3.2877500000  |
| Al | -2.2025760000 | -0.4292940000 | 1.4551050000  |
| Al | -1.8772900000 | -2.4508140000 | -0.7294350000 |
| Al | -4.1643040000 | -1.0878810000 | -0.3895190000 |
| Al | 2.2130720000  | -0.1839250000 | 1.2018930000  |
| Al | 2.8425410000  | -2.6124950000 | 0.1056210000  |
| Al | 0.1172080000  | -1.7251000000 | 1.1232830000  |
| Al | 0.5745320000  | -3.1090820000 | -1.1820500000 |
| Al | 2.5186450000  | 1.9689910000  | -0.4046000000 |
| Al | -0.0488000000 | 1.3920980000  | 1.1629070000  |
| Al | -1.3227730000 | 3.0927330000  | -0.7358720000 |
| Al | -3.0885040000 | 1.2313630000  | -0.8333650000 |
| Al | 0.9824650000  | 4.0738590000  | -0.0120910000 |
| Al | 3.4500180000  | -0.3644740000 | -1.4462260000 |
| B  | -1.8079080000 | -0.3958700000 | -1.2170200000 |
| B  | 1.3618850000  | -1.1334480000 | -0.9155890000 |
| B  | -0.2446310000 | -0.8500690000 | -1.2304660000 |
| B  | 0.9716050000  | 0.4249570000  | -1.1078850000 |
| B  | -0.7680660000 | 0.8553900000  | -1.2552210000 |
| B  | 0.4462890000  | 1.9683670000  | -1.0426610000 |

21

energy

|    |              |               |               |
|----|--------------|---------------|---------------|
| Al | 2.8739920000 | 1.0009160000  | -0.8138860000 |
| Al | 2.3595230000 | -0.3412200000 | 1.6013740000  |
| Al | 1.3719960000 | 3.1717010000  | -1.0753430000 |
| Al | 2.6510070000 | -1.8517950000 | -0.7514570000 |

|    |               |               |               |
|----|---------------|---------------|---------------|
| Al | -0.0124780000 | -1.6352090000 | 0.8367060000  |
| Al | 0.2551480000  | 1.3793830000  | 0.8058360000  |
| Al | 0.1085260000  | -0.1162100000 | 2.9759980000  |
| Al | -0.7872930000 | -3.7561750000 | -1.2645830000 |
| Al | -2.6867080000 | -2.2905410000 | -0.0206150000 |
| Al | -2.1717620000 | 0.0596800000  | 1.6295600000  |
| Al | -2.5531170000 | 1.6856530000  | -0.6882930000 |
| Al | -4.3205960000 | -0.1423820000 | -0.0007330000 |
| Al | 4.7639830000  | -0.6121740000 | 0.3437250000  |
| Al | -1.0826250000 | 3.8680160000  | 0.0072000000  |
| B  | 0.7909470000  | 1.0530440000  | -1.5566700000 |
| B  | -0.7548650000 | 0.3690980000  | -1.4319300000 |
| B  | 0.6330820000  | -2.1644760000 | -1.2595250000 |
| B  | 0.7476800000  | -0.5633290000 | -1.5395680000 |
| B  | -0.8116430000 | -1.3620690000 | -1.3457330000 |
| B  | -2.1092130000 | -0.4663480000 | -0.9298680000 |
| B  | -0.4969400000 | 2.0430030000  | -1.2589750000 |

22

energy

|    |               |               |               |
|----|---------------|---------------|---------------|
| Al | -2.3100760000 | -0.0048630000 | 1.2522110000  |
| Al | -4.4948570000 | -1.5090180000 | -0.0422560000 |
| Al | -4.1911980000 | 1.1482710000  | -0.7260970000 |
| Al | -1.9475070000 | -2.3866090000 | -0.2832130000 |
| Al | -2.1574340000 | 2.6020180000  | 0.2171830000  |
| Al | 0.1494940000  | 1.3828610000  | 1.5719580000  |
| Al | 0.2262340000  | 3.4685140000  | -0.1977150000 |
| Al | 3.8283810000  | -1.2455080000 | -1.0211660000 |
| Al | 0.2044690000  | -1.4430320000 | 1.5122800000  |
| Al | 2.3643030000  | 0.1256500000  | 0.8320190000  |
| Al | 2.5495620000  | 2.9499190000  | 0.6680650000  |
| Al | 0.4355990000  | -3.5886870000 | -0.2062130000 |
| Al | 2.8068200000  | -2.8173900000 | 0.7583820000  |
| Al | 3.5414380000  | 1.4849030000  | -1.2363710000 |
| B  | -1.9656210000 | 0.9434720000  | -1.2672640000 |
| B  | -2.7233830000 | -0.4708240000 | -1.0102480000 |
| B  | -1.0463120000 | -0.4196560000 | -1.2280300000 |
| B  | -0.3799810000 | 1.2965750000  | -1.0913320000 |
| B  | 0.7275690000  | -0.0893830000 | -0.8477740000 |
| B  | 0.0384310000  | -1.6096340000 | -1.1612880000 |
| B  | 1.5476560000  | -1.5987390000 | -0.6972680000 |
| B  | 1.1880500000  | 1.5139140000  | -0.7543650000 |

23

energy

|    |               |               |               |
|----|---------------|---------------|---------------|
| Al | 2.1918810000  | -0.4149450000 | 1.6850540000  |
| Al | 4.6625670000  | 0.2551140000  | 0.7247070000  |
| Al | 3.5984700000  | -1.7406970000 | -0.4389800000 |
| Al | 1.0720460000  | 3.4495770000  | -1.0105990000 |
| Al | 2.8658880000  | 2.0862530000  | 0.2739250000  |
| Al | 0.2549000000  | 1.3897230000  | 1.1924820000  |
| Al | -1.3839700000 | 3.0420190000  | -0.3463940000 |
| Al | -2.1954520000 | 0.4127840000  | 1.6916240000  |
| Al | -4.6626860000 | -0.2564410000 | 0.7189930000  |
| Al | -3.5959130000 | 1.7412770000  | -0.4362250000 |
| Al | -1.0692860000 | -3.4487280000 | -1.0142060000 |
| Al | -2.8660390000 | -2.0883970000 | 0.2692060000  |
| Al | -0.2598370000 | -1.3905550000 | 1.1991760000  |
| Al | 1.3843880000  | -3.0375180000 | -0.3420240000 |
| B  | 2.6942320000  | 0.1574950000  | -0.6948260000 |
| B  | 1.3420450000  | 0.9790390000  | -1.1251020000 |
| B  | -0.0940680000 | 1.6130110000  | -1.5819290000 |
| B  | -1.4515190000 | 0.8173050000  | -1.1280400000 |
| B  | 0.0003270000  | 0.0002710000  | -1.7742820000 |
| B  | 0.0954390000  | -1.6124780000 | -1.5834760000 |
| B  | -2.6920930000 | -0.1572100000 | -0.6921990000 |
| B  | -1.3399400000 | -0.9790420000 | -1.1237500000 |
| B  | 1.4534910000  | -0.8170040000 | -1.1299150000 |

15

energy  
Al 2.1653660000 1.7071000000 -0.0016080000  
Al 2.1652730000 -1.7070350000 0.0006900000  
Al 1.4802010000 0.0013560000 2.2183530000  
Al -0.0228110000 -2.2692440000 1.4716160000  
Al 4.1588920000 -0.0000610000 0.0018590000  
Al 0.0136270000 0.0000240000 -0.0005870000  
Al 1.4802720000 -0.0014390000 -2.2202340000  
Al -0.0232450000 -2.2704190000 -1.4694230000  
Al -0.0234720000 2.2688130000 -1.4719000000  
Al -1.3317860000 -0.0012020000 -2.3255560000  
Al -1.3308480000 0.0011630000 2.3250170000  
Al -0.0225360000 2.2709070000 1.4691320000  
Al -2.1989300000 1.5795630000 0.0004480000  
Al -4.3110180000 0.0000410000 0.0009070000  
Al -2.1989850000 -1.5795660000 0.0012850000

16  
energy  
Al 0.1997810000 2.1700250000 -1.3396760000  
Al 1.6812850000 0.0020340000 1.7830440000  
Al 2.4696040000 -1.7984700000 -0.0130080000  
Al 2.4699450000 1.7984520000 -0.0172630000  
Al 1.6556810000 -0.0021380000 -1.8183090000  
Al 4.4346180000 -0.0001130000 -0.0612060000  
Al 0.2304820000 2.1776330000 1.3949650000  
Al 0.2302140000 -2.1744640000 1.4001600000  
Al -3.8304280000 -0.0014310000 -1.4234330000  
Al -4.0873450000 0.0012930000 1.2169880000  
Al -1.8718420000 -1.3437670000 0.0628580000  
Al -0.9924370000 -0.0025450000 -2.2950960000  
Al 0.1996760000 -2.1734510000 -1.3349480000  
Al -0.9572710000 0.0029040000 2.3786720000  
Al -1.8717850000 1.3442000000 0.0601110000  
B 0.1035380000 -0.0004180000 0.0159640000

25  
energy  
Al 0.9604300000 1.7627410000 -1.9121990000  
Al 2.1892170000 2.2840140000 0.4022370000  
Al -3.6312410000 -0.3456600000 0.8109970000  
Al 1.1510350000 -2.1504180000 -1.8794720000  
Al 2.2900950000 -2.2691350000 0.5777330000  
Al -1.7778330000 -2.3437560000 -0.8012810000  
Al -1.9553550000 1.6183560000 1.3924460000  
Al -0.6304180000 -0.3697470000 -2.5729510000  
Al -0.2772050000 3.4985950000 0.0357660000  
Al -1.8047620000 1.7763360000 -1.4294740000  
Al -1.6600860000 -1.1860690000 2.1193980000  
Al -3.2561950000 -0.4114000000 -1.7996200000  
Al 2.8839880000 -0.1114450000 -2.0503100000  
Al 1.6365640000 0.0969990000 2.1242300000  
Al 3.6367570000 -0.0040530000 0.4691870000  
B 0.1939250000 -2.8145100000 -0.0429570000  
B 0.0177270000 -1.0083050000 -0.0843320000  
B 1.3818680000 -0.0406380000 -0.3693500000  
B -0.0255820000 0.7835280000 0.1412220000  
B -1.4652420000 -0.1353970000 -0.1348290000  
B 0.2228720000 1.9608410000 1.5651720000  
B 0.2072500000 -2.5693410000 1.5165570000  
B -0.0319040000 -0.3417170000 3.4400310000  
B -0.1597660000 1.1027350000 2.8543460000  
B 0.2958710000 -1.7351240000 2.8487500000

26  
energy  
Al 0.7665290000 -2.8203360000 -0.8649860000  
Al -2.3083820000 -0.1780450000 -1.6003350000  
Al -2.5835820000 -2.4767600000 0.2809120000  
Al -2.2621810000 -0.3103960000 1.6357210000

|    |               |               |               |
|----|---------------|---------------|---------------|
| Al | 0.2201570000  | 2.5420930000  | 1.3187590000  |
| Al | 2.6069030000  | 0.7035530000  | 1.5424720000  |
| Al | -0.4049020000 | -2.4213740000 | 1.7645300000  |
| Al | 0.4949290000  | -0.4453370000 | -2.4934810000 |
| Al | -1.5418760000 | -2.6127610000 | -2.1320970000 |
| Al | 1.6268400000  | 2.9808060000  | -0.8529580000 |
| Al | 2.8047170000  | -1.0300480000 | -1.1001200000 |
| Al | 2.3827250000  | -2.3374800000 | 1.3317380000  |
| Al | 3.6214710000  | 1.4352890000  | -0.7396440000 |
| Al | -0.4411470000 | 2.1248530000  | -2.2183630000 |
| Al | -3.3563930000 | 2.7067780000  | 0.3337250000  |
| B  | -0.4176030000 | -0.4028740000 | 2.9027900000  |
| B  | 1.0453640000  | -0.7561400000 | 2.1551420000  |
| B  | 1.4059350000  | 0.7295510000  | -0.5389010000 |
| B  | -1.9465310000 | 1.9232080000  | 1.6826530000  |
| B  | -0.7273540000 | -1.1549590000 | -0.2746180000 |
| B  | -0.2628580000 | 0.5058430000  | -0.4088620000 |
| B  | 0.8469730000  | -0.6776290000 | 0.2502650000  |
| B  | -0.9561340000 | 1.1160000000  | 2.7237990000  |
| B  | 0.6524650000  | 0.7892400000  | 2.6190470000  |
| B  | -1.5038160000 | 1.5703690000  | 0.0819490000  |
| B  | -2.3635370000 | 1.9192200000  | -1.3285400000 |

27

energy

|    |               |               |               |
|----|---------------|---------------|---------------|
| Al | 1.2497380000  | 0.9368410000  | -2.4546140000 |
| Al | 0.2408380000  | 2.8874770000  | 1.2298990000  |
| Al | 3.0342960000  | 1.9218320000  | -0.3769990000 |
| Al | 2.2989300000  | 0.7926060000  | 1.7951340000  |
| Al | 0.2402180000  | -1.7302740000 | 1.9965780000  |
| Al | -2.1742130000 | -0.5307970000 | 2.3628010000  |
| Al | -1.5369190000 | -2.4349970000 | -0.1005040000 |
| Al | 2.6091600000  | -0.6668700000 | -0.6426060000 |
| Al | -1.0542590000 | 1.8237300000  | -1.2678690000 |
| Al | 1.0608580000  | 3.4268260000  | -1.3544520000 |
| Al | -3.6407440000 | 1.3977740000  | -0.8762560000 |
| Al | -2.0867860000 | -0.5439930000 | -2.1274530000 |
| Al | 0.2779820000  | -1.5964590000 | -2.4765970000 |
| Al | 1.9832460000  | -3.3843220000 | -1.5972060000 |
| Al | -3.8480090000 | -1.1018620000 | 0.2994350000  |
| B  | -1.3361680000 | 1.6212620000  | 2.2010340000  |
| B  | 2.1538320000  | -2.6014190000 | 0.3012520000  |
| B  | 2.5255530000  | -1.9331210000 | 1.6922460000  |
| B  | 0.6113630000  | -2.0757710000 | -0.2369590000 |
| B  | -2.1125470000 | 1.3378970000  | 0.8024880000  |
| B  | -1.7428720000 | -0.1207210000 | 0.0151650000  |
| B  | -0.2180330000 | 0.6848390000  | 2.8429640000  |
| B  | 0.9075520000  | 0.9935790000  | -0.0986740000 |
| B  | -0.4321350000 | 0.6502930000  | 0.9728920000  |
| B  | -0.0745630000 | -0.4946570000 | -0.2817530000 |
| B  | 2.1280880000  | -1.1176560000 | 2.9535890000  |
| B  | 1.0886560000  | -0.0580580000 | 3.3716040000  |

28

energy

|    |               |               |               |
|----|---------------|---------------|---------------|
| Al | 2.6601320000  | 0.8568540000  | 0.1794210000  |
| Al | -0.8427120000 | -1.8693030000 | 1.6977310000  |
| Al | 1.9230700000  | 1.2299650000  | 2.5647110000  |
| Al | -1.0111110000 | 0.9173130000  | 2.3846480000  |
| Al | 0.2205670000  | 1.0804050000  | -2.3258690000 |
| Al | -2.3137060000 | 0.0509520000  | -2.0826780000 |
| Al | -0.2835650000 | -1.9281170000 | -2.7694290000 |
| Al | 0.5297890000  | 2.6034880000  | 0.8508150000  |
| Al | 2.0411300000  | -1.5347750000 | 1.4968630000  |
| Al | 0.6607520000  | -0.8886530000 | 3.6964270000  |
| Al | -2.1615770000 | -3.6447820000 | -0.0480490000 |
| Al | -3.0129640000 | 1.4226240000  | 0.4206780000  |
| Al | -3.1515760000 | -1.1535640000 | 0.3403210000  |
| Al | -2.1066830000 | 3.7920810000  | -0.3491750000 |

|    |               |               |               |
|----|---------------|---------------|---------------|
| Al | 2.0157510000  | -0.9191010000 | -2.3113800000 |
| B  | 1.2821830000  | 2.7911200000  | -1.4735180000 |
| B  | 3.5200480000  | 0.6523380000  | -1.7746900000 |
| B  | -0.1325880000 | -2.7026270000 | -0.3851810000 |
| B  | 2.9480580000  | -1.9120470000 | -0.5171890000 |
| B  | -1.2460230000 | -1.4531170000 | -0.6584610000 |
| B  | 0.5371600000  | 0.1083820000  | 0.9485100000  |
| B  | -0.9478390000 | 0.1502240000  | -0.0099390000 |
| B  | 0.4080870000  | -1.0047840000 | -0.3481350000 |
| B  | -1.2481280000 | 1.6585880000  | -0.8010680000 |
| B  | -0.2673400000 | 2.9781090000  | -1.1128200000 |
| B  | 2.4664810000  | 1.8505910000  | -1.8344490000 |
| B  | 3.8063230000  | -0.7110690000 | -1.0881740000 |
| B  | 1.4386030000  | -2.4457170000 | -0.6819750000 |

29

energy

|    |               |               |               |
|----|---------------|---------------|---------------|
| Al | 2.5828800000  | -1.0125040000 | 1.0199330000  |
| Al | -1.1970650000 | -1.3001910000 | -1.9106590000 |
| Al | 2.9782680000  | -1.1737690000 | -1.5068780000 |
| Al | 0.8237720000  | 0.4123210000  | -2.7112430000 |
| Al | 0.3823090000  | 0.6226960000  | 2.4051290000  |
| Al | -1.5826430000 | 2.1248780000  | 1.1693970000  |
| Al | -2.0866750000 | -0.6433290000 | 2.3998420000  |
| Al | 2.3655250000  | 1.2812280000  | -0.7101640000 |
| Al | 0.9141130000  | -2.9688490000 | -0.2975070000 |
| Al | 1.0147910000  | -2.2970700000 | -2.9572680000 |
| Al | -3.7549890000 | -0.9302430000 | -1.2160810000 |
| Al | -0.2001440000 | 2.8460660000  | -1.4479500000 |
| Al | -3.8840510000 | 0.7781590000  | 0.9406560000  |
| Al | -2.1804790000 | 1.2636440000  | -1.6725750000 |
| Al | 1.6404920000  | 4.2109810000  | -0.0440010000 |
| B  | 2.4155360000  | 0.0560320000  | 2.9036880000  |
| B  | 1.1640200000  | -2.7364660000 | 2.6190470000  |
| B  | 1.8382240000  | -1.4107450000 | 3.0462250000  |
| B  | -2.0995720000 | -1.6225190000 | 0.1442430000  |
| B  | -1.2473840000 | -2.5808620000 | 1.1412450000  |
| B  | -1.7840020000 | 0.0493680000  | 0.1038970000  |
| B  | 0.8752970000  | -0.7141880000 | -0.6362380000 |
| B  | -0.1741380000 | 0.6829650000  | -0.2966540000 |
| B  | -0.4065660000 | -0.9801030000 | 0.4736030000  |
| B  | -0.0503360000 | -1.5834710000 | 2.0767290000  |
| B  | 0.5195350000  | 2.0278900000  | 0.5677720000  |
| B  | 2.5573270000  | 1.3232990000  | 2.0333690000  |
| B  | 2.0860660000  | 2.4786020000  | 1.0364420000  |
| B  | -0.0158810000 | -3.3462530000 | 1.7889880000  |

30

energy

|    |               |               |               |
|----|---------------|---------------|---------------|
| Al | 2.9855700000  | 0.5037540000  | -0.2519200000 |
| Al | -0.9052400000 | -1.7661040000 | 1.4260390000  |
| Al | 2.9432600000  | -0.3133820000 | 2.1102630000  |
| Al | 0.3446890000  | 0.0675790000  | 2.8872050000  |
| Al | 0.4297790000  | 1.2636670000  | -2.1115310000 |
| Al | -2.1488620000 | 2.0225860000  | -0.4228780000 |
| Al | -1.7828470000 | -0.4118450000 | -2.5918020000 |
| Al | 1.4775900000  | 2.0465060000  | 1.6740520000  |
| Al | 1.9084640000  | -2.3085930000 | 0.0164460000  |
| Al | 1.3866110000  | -2.4492680000 | 2.6363840000  |
| Al | -3.6486670000 | -1.5909870000 | 1.1685370000  |
| Al | -2.3414440000 | 0.7199960000  | 1.9734640000  |
| Al | -2.1731610000 | -2.4494540000 | -0.8161440000 |
| Al | -3.8379400000 | 0.0281630000  | -1.0760030000 |
| Al | -0.9847070000 | 4.4098390000  | 0.3140600000  |
| B  | 0.9508420000  | 3.5529940000  | 0.3059800000  |
| B  | 1.9388790000  | -0.8185730000 | -2.5486910000 |
| B  | 2.5417220000  | 1.9372440000  | -1.8763880000 |
| B  | -0.4065670000 | -2.2568110000 | -1.9169070000 |
| B  | 1.1490360000  | -2.4891210000 | -2.3017710000 |

|   |               |               |               |
|---|---------------|---------------|---------------|
| B | -1.7248970000 | -0.2373470000 | -0.1261810000 |
| B | 1.0276800000  | -0.4409130000 | 0.6803140000  |
| B | -0.3145850000 | 0.6265350000  | 0.3383170000  |
| B | -0.0985930000 | -0.8129230000 | -0.6745970000 |
| B | 0.2949990000  | -0.8086650000 | -2.4092510000 |
| B | 3.5209820000  | -0.9445770000 | -2.1224980000 |
| B | 2.6955400000  | -2.2928630000 | -2.0436660000 |
| B | 0.0330690000  | 2.2368830000  | -0.1608240000 |
| B | 3.0780650000  | 0.5458880000  | -2.3981620000 |
| B | 1.8157780000  | 2.7938600000  | -0.7797240000 |

31

energy

|    |               |               |               |
|----|---------------|---------------|---------------|
| Al | -2.8456430000 | 0.6406450000  | -0.3627440000 |
| Al | 0.8402020000  | -1.6491760000 | 1.9445330000  |
| Al | -2.5271790000 | 0.8148240000  | 2.1428750000  |
| Al | 0.1551160000  | 0.9093140000  | 2.5400210000  |
| Al | -0.4981160000 | 0.6541400000  | -2.1645150000 |
| Al | 2.3699340000  | 0.9898080000  | -1.5595830000 |
| Al | 1.2844790000  | -1.7791310000 | -2.5129740000 |
| Al | -0.9586180000 | 2.6566540000  | 0.8959060000  |
| Al | -1.9419450000 | -2.0560200000 | 0.9618630000  |
| Al | -1.3338500000 | -1.2747410000 | 3.4711570000  |
| Al | 3.2311030000  | -2.3872650000 | 0.9474800000  |
| Al | 1.9354900000  | 2.6891920000  | 0.9459240000  |
| Al | 2.7659660000  | 0.2705890000  | 1.3978180000  |
| Al | 0.6986130000  | 4.4789020000  | -0.6690200000 |
| Al | 3.6877060000  | -1.3441680000 | -1.5402990000 |
| B  | -1.9837680000 | 2.2769440000  | -1.9524540000 |
| B  | -2.3845520000 | -1.6830650000 | -1.8764560000 |
| B  | -2.8129860000 | 1.1093050000  | -2.4685310000 |
| B  | 1.2311880000  | -2.3901720000 | -0.1316700000 |
| B  | -0.1316070000 | -2.8343360000 | -0.9136420000 |
| B  | 1.7081140000  | -0.7748190000 | -0.2540390000 |
| B  | -0.8951000000 | -0.0912970000 | 0.7569790000  |
| B  | 0.6376490000  | 0.5400340000  | 0.1034520000  |
| B  | -0.0703820000 | -1.0428690000 | -0.4481760000 |
| B  | -0.7334910000 | -1.5581110000 | -1.9873300000 |
| B  | -3.1946540000 | -2.8160900000 | -0.8463420000 |
| B  | -1.7142050000 | -3.2303890000 | -0.9915810000 |
| B  | 0.6478210000  | 2.0062440000  | -0.8635600000 |
| B  | -0.6874180000 | 2.9577540000  | -1.2574180000 |
| B  | -3.9708470000 | -1.5301790000 | -1.3796780000 |
| B  | -3.4902310000 | -0.3342280000 | -2.2295050000 |

17

energy

|    |               |               |               |
|----|---------------|---------------|---------------|
| Al | -1.0789310000 | 2.3901400000  | 0.0021200000  |
| Al | -3.6752660000 | 1.5538740000  | 0.0008610000  |
| Al | -1.8254930000 | -2.5330540000 | -0.0010610000 |
| Al | 0.2510310000  | -1.6315860000 | 1.4680360000  |
| Al | -1.8998930000 | -0.0417610000 | 1.4392740000  |
| Al | -4.1133920000 | -0.9846830000 | -0.0001520000 |
| Al | -1.9003920000 | -0.0416080000 | -1.4391860000 |
| Al | 0.2510680000  | -1.6290450000 | -1.4695420000 |
| Al | 2.4967550000  | -0.3280900000 | -2.0925340000 |
| Al | 2.5543510000  | -2.1601150000 | -0.0028110000 |
| Al | 3.6316230000  | 0.7077940000  | 0.0009330000  |
| Al | 0.3972330000  | 1.2501630000  | 2.1317200000  |
| Al | 2.4975800000  | -0.3333950000 | 2.0918390000  |
| Al | 1.5933730000  | 2.4358320000  | 0.0007100000  |
| Al | 0.3950190000  | 1.2534150000  | -2.1304670000 |
| B  | 1.3544920000  | 0.0397040000  | 0.0004660000  |
| B  | -0.2486260000 | 0.1998060000  | 0.0002110000  |

18

energy

|    |               |              |              |
|----|---------------|--------------|--------------|
| Al | -3.7870490000 | 0.4300830000 | 0.2678400000 |
| Al | 2.1422280000  | 2.3579490000 | 0.1744970000 |
| Al | -0.0034380000 | 3.8035860000 | 0.0017780000 |

|    |               |               |               |
|----|---------------|---------------|---------------|
| Al | -2.9732790000 | -1.4820060000 | -1.1858090000 |
| Al | 0.1371860000  | 1.3120970000  | -1.4345430000 |
| Al | 1.9882780000  | -0.5870010000 | -1.8746970000 |
| Al | 3.7863820000  | 0.4367670000  | -0.2665850000 |
| Al | 1.2185760000  | -2.6627340000 | -0.3729140000 |
| Al | -0.5779430000 | -1.2034010000 | -2.2427410000 |
| Al | 2.9778660000  | -1.4788980000 | 1.1857480000  |
| Al | -2.1470640000 | 2.3547290000  | -0.1737210000 |
| Al | -1.2143590000 | -2.6642970000 | 0.3731830000  |
| Al | -0.1406040000 | 1.3097360000  | 1.4308630000  |
| Al | -1.9881420000 | -0.5902760000 | 1.8770980000  |
| Al | 0.5802180000  | -1.2032000000 | 2.2390130000  |
| B  | -1.4824150000 | 0.0900460000  | -0.3396500000 |
| B  | 1.4839870000  | 0.0900320000  | 0.3437120000  |
| B  | 0.0014030000  | -0.5262350000 | -0.0014890000 |

19

energy

|    |               |               |               |
|----|---------------|---------------|---------------|
| Al | -1.2747700000 | 1.4951050000  | -1.9220990000 |
| Al | -3.5556150000 | 0.9575660000  | -0.6108370000 |
| Al | 0.0016890000  | 3.2517820000  | -0.1334070000 |
| Al | 1.4017210000  | 1.3240070000  | -1.6156910000 |
| Al | 1.8469930000  | 1.8713190000  | 1.1170160000  |
| Al | -1.8318780000 | 1.9434530000  | 1.1451800000  |
| Al | 0.0624600000  | -0.9869780000 | -1.9411810000 |
| Al | -2.1147580000 | -0.7887350000 | 1.9102860000  |
| Al | 0.2932120000  | 0.1783610000  | 2.3577830000  |
| Al | -1.3968010000 | -2.8014820000 | -0.4613760000 |
| Al | 1.1203400000  | -2.7796950000 | 0.2396000000  |
| Al | 2.8098730000  | -1.5494620000 | -1.3733000000 |
| Al | -3.6084060000 | -1.5119470000 | -0.0766780000 |
| Al | 2.8729310000  | -0.9387870000 | 1.6814300000  |
| Al | 3.6678650000  | 0.7102870000  | -0.3414980000 |
| B  | -0.1663330000 | 0.6743720000  | -0.0847990000 |
| B  | -1.5881300000 | -0.3087880000 | -0.3954850000 |
| B  | 1.2635700000  | -0.3413560000 | 0.0830930000  |
| B  | -0.2757300000 | -0.9986940000 | 0.4615980000  |

20

energy

|    |               |               |               |
|----|---------------|---------------|---------------|
| Al | 2.1954190000  | -1.7498210000 | -1.5217680000 |
| Al | -0.3235060000 | -2.7540460000 | -1.4232880000 |
| Al | 2.1252020000  | -1.5035680000 | 1.4827420000  |
| Al | -2.6880920000 | -1.4983630000 | -1.4185680000 |
| Al | -0.1421100000 | -2.9130140000 | 1.4105650000  |
| Al | -0.1557270000 | 0.0011140000  | 2.2167410000  |
| Al | -2.4167140000 | -1.4790500000 | 1.4849550000  |
| Al | -2.6879450000 | 1.4954000000  | -1.4197080000 |
| Al | -0.0948010000 | -0.0003380000 | -2.1058140000 |
| Al | 3.8162990000  | 0.0005910000  | -0.0776630000 |
| Al | 2.1916020000  | 1.7494630000  | -1.5216870000 |
| Al | -0.3262600000 | 2.7544300000  | -1.4239100000 |
| Al | -2.4159320000 | 1.4791420000  | 1.4843540000  |
| Al | -0.1416070000 | 2.9141590000  | 1.4093180000  |
| Al | 2.1254510000  | 1.5045470000  | 1.4811230000  |
| B  | -1.3391000000 | -0.0003980000 | -0.0967190000 |
| B  | 0.0821310000  | -0.9070410000 | 0.0560250000  |
| B  | -3.0664880000 | -0.0003800000 | 0.0692130000  |
| B  | 1.4817800000  | -0.0009740000 | -0.2326240000 |
| B  | 0.0823500000  | 0.9071140000  | 0.0548870000  |

21

energy

|    |               |               |               |
|----|---------------|---------------|---------------|
| Al | -2.6408700000 | 1.3446740000  | -0.8340780000 |
| Al | -2.6411510000 | -1.3422880000 | -0.8397180000 |
| Al | -1.5841340000 | 3.7311960000  | -0.5032440000 |
| Al | -1.5828990000 | -3.7269960000 | -0.5007930000 |
| Al | 0.8689190000  | -3.2567720000 | -1.2012210000 |
| Al | 2.8230560000  | -1.9159860000 | -0.3238040000 |
| Al | 2.8242850000  | 1.9173120000  | -0.3193900000 |

|    |               |               |               |
|----|---------------|---------------|---------------|
| Al | 4.5312280000  | -0.0001640000 | 0.0475660000  |
| Al | -4.6503550000 | -0.0015320000 | 0.4749880000  |
| Al | 0.8694690000  | 3.2585630000  | -1.1947000000 |
| Al | 0.0513420000  | -0.0026990000 | 3.0597930000  |
| Al | -2.1502470000 | -0.0028070000 | 1.6249230000  |
| Al | 0.0793170000  | -1.5374560000 | 0.8975130000  |
| Al | 0.0784090000  | 1.5328860000  | 0.8989880000  |
| Al | 2.3098850000  | -0.0017530000 | 1.6875520000  |
| B  | -0.5868560000 | 1.6586250000  | -1.3149920000 |
| B  | 0.8729720000  | 0.8788970000  | -1.3624490000 |
| B  | -0.5864820000 | -1.6554390000 | -1.3174110000 |
| B  | -0.6640750000 | 0.0015040000  | -1.3731120000 |
| B  | 0.8730730000  | -0.8753390000 | -1.3632640000 |
| B  | 2.2071030000  | 0.0016880000  | -1.0021440000 |

22

energy

|    |               |               |               |
|----|---------------|---------------|---------------|
| Al | 2.2056520000  | 0.5499430000  | 1.1182460000  |
| Al | -1.5080310000 | -2.9268330000 | -0.2601020000 |
| Al | 3.6658770000  | 1.9103000000  | -0.8096420000 |
| Al | 0.1954500000  | -1.3181070000 | 1.3350780000  |
| Al | 0.9628580000  | -3.3819650000 | -0.2430470000 |
| Al | 2.8947500000  | -2.1909160000 | 1.1107120000  |
| Al | 2.1115140000  | -0.9899440000 | -1.2749900000 |
| Al | -2.3783250000 | -0.6113770000 | 1.2639860000  |
| Al | -3.6926490000 | -1.7575740000 | -1.0265290000 |
| Al | -3.0675520000 | 2.0027710000  | 0.2697020000  |
| Al | -4.8112800000 | 0.1942600000  | 0.1858540000  |
| Al | -0.3629800000 | 1.4123660000  | 1.4467210000  |
| Al | -1.0526590000 | 3.5225030000  | -0.1633020000 |
| Al | 1.5672320000  | 3.2712860000  | 0.0151820000  |
| Al | 4.5783450000  | -0.6068210000 | -0.1038900000 |
| B  | 0.0569080000  | -1.5155760000 | -1.1546890000 |
| B  | 1.5750580000  | 1.2166690000  | -1.0456220000 |
| B  | -1.3428480000 | -0.6865710000 | -1.1253670000 |
| B  | -2.6923380000 | 0.2242310000  | -0.9524010000 |
| B  | 0.2492080000  | 0.1694590000  | -1.0255730000 |
| B  | -1.3424920000 | 1.1373520000  | -1.0299080000 |
| B  | 0.0951700000  | 1.8467170000  | -1.1127880000 |

23

energy

|    |               |               |               |
|----|---------------|---------------|---------------|
| Al | -2.1591130000 | 0.3898380000  | -1.7061680000 |
| Al | -3.6019520000 | 1.7402080000  | 0.2930500000  |
| Al | -2.9139170000 | -2.1382590000 | -0.2916580000 |
| Al | -4.6595740000 | -0.2802490000 | -0.8833050000 |
| Al | 1.0179790000  | 3.5460140000  | 0.8059860000  |
| Al | -1.4387040000 | 3.1434060000  | 0.1490370000  |
| Al | 0.2507260000  | 1.3722880000  | -1.1943310000 |
| Al | -0.0002670000 | 0.0002860000  | 2.6979880000  |
| Al | 1.4389780000  | -3.1422780000 | 0.1493230000  |
| Al | -0.2513510000 | -1.3728000000 | -1.1953670000 |
| Al | -1.0182720000 | -3.5452720000 | 0.8065150000  |
| Al | 2.1588000000  | -0.3902510000 | -1.7056090000 |
| Al | 2.9134320000  | 2.1378820000  | -0.2916740000 |
| Al | 3.6028600000  | -1.7402480000 | 0.2928630000  |
| Al | 4.6596250000  | 0.2803490000  | -0.8839960000 |
| B  | -2.7078660000 | -0.1649280000 | 0.5766260000  |
| B  | -0.0909810000 | 1.6469900000  | 1.2917110000  |
| B  | -1.4727430000 | 0.8369950000  | 0.9774320000  |
| B  | -1.3553440000 | -0.9666580000 | 0.9976540000  |
| B  | 1.4736690000  | -0.8379200000 | 0.9782960000  |
| B  | 0.0913910000  | -1.6468600000 | 1.2923430000  |
| B  | 1.3554680000  | 0.9653540000  | 0.9979230000  |
| B  | 2.7083540000  | 0.1646530000  | 0.5771120000  |

24

energy

|    |              |               |               |
|----|--------------|---------------|---------------|
| Al | 1.8464040000 | -2.8827040000 | -0.1524600000 |
| Al | 0.2382080000 | -1.3422170000 | 1.4745170000  |

|    |               |               |               |
|----|---------------|---------------|---------------|
| Al | -4.4620870000 | -0.2457510000 | 1.0639070000  |
| Al | -0.6622180000 | -3.3418210000 | -0.2348240000 |
| Al | -2.6436130000 | -2.0426780000 | 0.7060940000  |
| Al | -1.9886720000 | 0.5023310000  | 1.6570070000  |
| Al | -3.5638540000 | 1.7824990000  | -0.7034780000 |
| Al | 3.9070000000  | -1.6367740000 | -1.0939530000 |
| Al | 1.0948130000  | 3.3602080000  | -0.4522570000 |
| Al | 0.6883990000  | 1.3665300000  | 1.4201390000  |
| Al | 2.8638650000  | -0.4633240000 | 1.3936530000  |
| Al | 5.1318500000  | 0.3731640000  | 0.0199700000  |
| Al | 3.2321360000  | 2.0813150000  | 0.1143010000  |
| Al | -1.3448290000 | 2.9370010000  | 0.1226930000  |
| Al | -4.8040000000 | -0.4444530000 | -1.6215160000 |
| B  | 0.2701320000  | -1.6288450000 | -1.2872110000 |
| B  | -1.2160810000 | -1.0491480000 | -0.9691950000 |
| B  | -2.6336720000 | -0.2577050000 | -0.6054920000 |
| B  | 0.1049510000  | -0.0012080000 | -1.3605300000 |
| B  | -0.0221980000 | 1.6276950000  | -1.2566070000 |
| B  | -1.3790420000 | 0.7698090000  | -0.9233620000 |
| B  | 1.6631040000  | -0.7688990000 | -1.1358400000 |
| B  | 2.9341750000  | 0.2611860000  | -1.0030220000 |
| B  | 1.4917860000  | 1.0384680000  | -1.1146010000 |

16

energy

|    |               |               |               |
|----|---------------|---------------|---------------|
| Al | 0.4735810000  | -1.3253090000 | 2.2651290000  |
| Al | -3.6703320000 | 1.2234030000  | -0.0006140000 |
| Al | -1.8796470000 | -0.1502770000 | -1.5274980000 |
| Al | -1.8797520000 | -0.1493930000 | 1.5272080000  |
| Al | 1.6145570000  | -2.5309330000 | 0.0017060000  |
| Al | -3.9560010000 | -1.4693210000 | 0.0003190000  |
| Al | -1.0157930000 | -2.2810440000 | 0.0004430000  |
| Al | 0.4739970000  | -1.3272510000 | -2.2641070000 |
| Al | 0.1064920000  | 1.4728680000  | 2.2727980000  |
| Al | -1.2000170000 | 2.2590120000  | 0.0003540000  |
| Al | 0.1055740000  | 1.4725000000  | -2.2730700000 |
| Al | 2.5570300000  | 0.6054500000  | -1.7876640000 |
| Al | 0.5443670000  | 0.0213050000  | -0.0002100000 |
| Al | 3.6427940000  | -0.9300970000 | -0.0008980000 |
| Al | 2.5583250000  | 0.6062230000  | 1.7863100000  |
| Al | 1.5248240000  | 2.5028640000  | -0.0002060000 |

17

energy

|    |               |               |               |
|----|---------------|---------------|---------------|
| Al | 1.3317830000  | -2.2105620000 | -0.0000600000 |
| Al | -1.3314530000 | -2.2098640000 | 0.0000500000  |
| Al | 2.0980560000  | 0.0010800000  | 1.4450090000  |
| Al | 4.0300230000  | -1.3235940000 | 0.0019470000  |
| Al | -4.0314030000 | -1.3239090000 | -0.0003110000 |
| Al | 2.0991450000  | -0.0005150000 | -1.4476370000 |
| Al | -0.0000170000 | -1.3598380000 | 2.1722170000  |
| Al | 0.0000230000  | -1.3599900000 | -2.1726870000 |
| Al | -2.0990130000 | 0.0000170000  | 1.4451800000  |
| Al | -0.0009390000 | 1.3582690000  | 2.1728960000  |
| Al | 1.3316100000  | 2.2094660000  | 0.0007430000  |
| Al | -4.0307340000 | 1.3233060000  | -0.0006700000 |
| Al | -1.3318300000 | 2.2116610000  | 0.0011350000  |
| Al | 4.0318860000  | 1.3235770000  | -0.0001940000 |
| Al | -2.0977660000 | 0.0005050000  | -1.4459160000 |
| Al | 0.0004020000  | 1.3605940000  | -2.1717050000 |
| B  | 0.0005890000  | -0.0005240000 | 0.0000060000  |

26

energy

|    |               |               |               |
|----|---------------|---------------|---------------|
| Al | 2.7090590000  | -1.3978360000 | -0.9857630000 |
| Al | -1.6199640000 | -1.8307620000 | -1.4242850000 |
| Al | -0.0514640000 | -3.6957860000 | 0.1175680000  |
| Al | -1.2934860000 | -1.8944530000 | 1.5581880000  |
| Al | -1.2976040000 | 1.8917550000  | 1.5579020000  |
| Al | 1.6691420000  | 2.1630100000  | 1.5165270000  |

|    |               |               |               |
|----|---------------|---------------|---------------|
| Al | 1.6739900000  | -2.1594990000 | 1.5167900000  |
| Al | 0.7348050000  | 0.0006840000  | -2.3504860000 |
| Al | 0.7704340000  | -2.7778530000 | -2.2248780000 |
| Al | -0.0603890000 | 3.6954960000  | 0.1173660000  |
| Al | 2.7059640000  | 1.4033150000  | -0.9855060000 |
| Al | 3.5837580000  | 0.0036380000  | 1.2572060000  |
| Al | -1.6230190000 | 1.8262520000  | -1.4266590000 |
| Al | 0.7652490000  | 2.7795300000  | -2.2243710000 |
| Al | -4.3043840000 | -0.0026750000 | 0.9070980000  |
| Al | -3.5089420000 | -0.0037730000 | -1.5660150000 |
| B  | 0.2875620000  | -0.8121350000 | 2.7839160000  |
| B  | 1.6030800000  | 0.0017080000  | 2.1679510000  |
| B  | 0.3964170000  | 1.4092760000  | -0.3214890000 |
| B  | -2.1752600000 | -0.0027730000 | 0.2534390000  |
| B  | 0.4001750000  | -1.4085200000 | -0.3220850000 |
| B  | -0.5546180000 | -0.0009250000 | -0.3169570000 |
| B  | 1.1714110000  | 0.0012000000  | 0.2705030000  |
| B  | -1.1276280000 | -0.0010000000 | 2.8332180000  |
| B  | 0.2859650000  | 0.8128210000  | 2.7841690000  |
| B  | -2.5052900000 | -0.0023660000 | 1.9295640000  |

27

energy

|    |               |               |               |
|----|---------------|---------------|---------------|
| Al | 1.3101400000  | 1.0513050000  | -2.5436510000 |
| Al | 0.0935030000  | 2.8931090000  | 1.1016110000  |
| Al | 2.8120370000  | 2.2893060000  | -0.4699900000 |
| Al | 2.3254590000  | 1.0461840000  | 1.6877160000  |
| Al | 0.6733180000  | -1.7683310000 | 2.0176560000  |
| Al | -1.7351670000 | -0.7425910000 | 2.4515130000  |
| Al | -1.1353260000 | -2.6713840000 | 0.0798370000  |
| Al | 2.7535800000  | -0.3784760000 | -0.6963730000 |
| Al | -1.1582690000 | 1.4145810000  | -1.3777100000 |
| Al | 0.6268490000  | 3.4708510000  | -1.5257730000 |
| Al | -3.8796140000 | 0.7541470000  | -1.3839700000 |
| Al | -2.1101830000 | -1.1463530000 | -1.9848820000 |
| Al | 0.4380110000  | -1.5768020000 | -2.4185230000 |
| Al | -3.5524140000 | -1.5002180000 | 0.5395360000  |
| Al | -2.8066700000 | 1.3488980000  | 0.9363980000  |
| Al | 2.4098500000  | -3.1330270000 | -1.6587370000 |
| B  | -1.2426390000 | 1.5454100000  | 2.2830130000  |
| B  | 2.9068690000  | -1.6236140000 | 1.5999390000  |
| B  | 2.4540950000  | -0.8303510000 | 2.8640650000  |
| B  | 2.5606680000  | -2.3578430000 | 0.2425990000  |
| B  | -1.6437980000 | -0.3514600000 | 0.0642370000  |
| B  | -0.0354500000 | 0.8357640000  | 2.9849320000  |
| B  | 0.8516500000  | 1.0422360000  | -0.1570820000 |
| B  | -0.5157660000 | 0.7080570000  | 0.8617520000  |
| B  | 0.0558560000  | -0.5331390000 | -0.2077230000 |
| B  | 1.3136400000  | 0.0868290000  | 3.3378990000  |
| B  | 0.9256080000  | -2.0350030000 | -0.2357380000 |

28

energy

|    |               |               |               |
|----|---------------|---------------|---------------|
| Al | -0.5085230000 | 1.5957550000  | 2.4696980000  |
| Al | -1.5960770000 | -2.2939680000 | 1.1937390000  |
| Al | -2.7462770000 | -0.5531280000 | -0.6287120000 |
| Al | -0.2095310000 | 0.2784520000  | -2.5627920000 |
| Al | 1.6432180000  | -1.8300560000 | -1.9820220000 |
| Al | 2.1871100000  | 1.1110730000  | -1.5655190000 |
| Al | -1.9644190000 | -3.5331890000 | -1.5375240000 |
| Al | -1.8585190000 | 2.1300000000  | 0.1248070000  |
| Al | 0.8543400000  | -0.8184930000 | 2.2575870000  |
| Al | -1.4928210000 | -0.7359890000 | 3.4150590000  |
| Al | 3.1535150000  | -1.9334740000 | 1.5551380000  |
| Al | 3.8781290000  | -0.8484150000 | -0.8826380000 |
| Al | 2.7667940000  | 0.8733690000  | 1.2751960000  |
| Al | 1.1861610000  | 2.8983010000  | 0.7870440000  |
| Al | -0.0103460000 | 4.2932210000  | -1.1280670000 |
| Al | -3.1186260000 | 0.4954090000  | 1.7157840000  |

|   |               |               |               |
|---|---------------|---------------|---------------|
| B | -0.0081300000 | -2.7933420000 | -0.5392010000 |
| B | -2.0787710000 | 1.5363260000  | -2.4511860000 |
| B | -2.4175580000 | 0.0487440000  | -2.7810340000 |
| B | -1.1013430000 | 2.6248510000  | -1.8384300000 |
| B | 1.2234200000  | -2.1853890000 | 0.3629690000  |
| B | 1.6683550000  | -0.5557020000 | 0.0229770000  |
| B | -0.5423060000 | -1.7785580000 | -1.7442610000 |
| B | -1.0185770000 | -0.0188070000 | 0.8521080000  |
| B | -0.0330130000 | -1.0180900000 | -0.2132580000 |
| B | 0.4372200000  | 0.6657770000  | 0.0915180000  |
| B | -1.9879740000 | -1.4267030000 | -2.4670120000 |
| B | 0.2319460000  | 1.9658330000  | -1.0128080000 |

29

energy

|    |               |               |               |
|----|---------------|---------------|---------------|
| Al | 2.5909520000  | -1.3141060000 | -0.3178230000 |
| Al | -0.3817620000 | 1.2134540000  | 2.1730660000  |
| Al | 1.7665210000  | -2.4243860000 | 1.9190920000  |
| Al | -0.9885240000 | -1.5613820000 | 2.2972140000  |
| Al | 0.3833050000  | -0.4478300000 | -2.4986540000 |
| Al | -2.0608980000 | 0.5716660000  | -1.9417020000 |
| Al | 0.3140450000  | 2.3885120000  | -2.0414670000 |
| Al | 0.0935050000  | -2.7719300000 | -0.0259000000 |
| Al | 2.4756040000  | 0.6153650000  | 1.6223590000  |
| Al | 1.0744360000  | -0.4542520000 | 3.6274810000  |
| Al | -1.2082840000 | 3.6339120000  | 1.3455750000  |
| Al | -3.1227040000 | -1.0545430000 | 0.6535160000  |
| Al | -2.1339570000 | 3.1834550000  | -1.2953330000 |
| Al | -2.7862910000 | 1.4421310000  | 0.9447370000  |
| Al | -3.2390120000 | -3.1315150000 | -0.8439090000 |
| Al | 3.9637970000  | 1.5825320000  | -0.7133040000 |
| B  | 0.0960120000  | -2.9297430000 | -2.2922100000 |
| B  | 3.2143730000  | 0.0526380000  | -1.9886070000 |
| B  | 1.5083630000  | -2.3390890000 | -2.5202400000 |
| B  | 0.4491610000  | 2.4728010000  | 0.3919480000  |
| B  | 1.8837620000  | 2.1672530000  | -0.2903960000 |
| B  | -0.8765280000 | 1.5109390000  | -0.1483190000 |
| B  | 0.6489960000  | -0.6528740000 | 0.8958780000  |
| B  | -0.8122180000 | -0.2152700000 | 0.0096870000  |
| B  | 0.7338090000  | 0.7244510000  | -0.1583800000 |
| B  | 1.9178730000  | 0.9775330000  | -1.4833340000 |
| B  | -1.6185170000 | -1.3883790000 | -0.9746770000 |
| B  | -1.3446710000 | -2.8900010000 | -1.6633950000 |
| B  | 2.6736830000  | -1.3150730000 | -2.5308250000 |

30

energy

|    |               |               |               |
|----|---------------|---------------|---------------|
| Al | -3.2235910000 | -0.1535520000 | 0.2739590000  |
| Al | 0.9473970000  | -1.3508420000 | 2.1336820000  |
| Al | -2.5578590000 | 1.4016090000  | 2.2112300000  |
| Al | 0.1613060000  | 1.2772670000  | 2.5469260000  |
| Al | -0.1517950000 | 0.8353120000  | -2.3668670000 |
| Al | 2.4832990000  | 0.7746230000  | -1.5563270000 |
| Al | 1.1500020000  | -1.7740220000 | -2.2865320000 |
| Al | -1.3552330000 | 2.2917920000  | 0.1491070000  |
| Al | -1.4941450000 | -2.1368670000 | 1.1566600000  |
| Al | -1.3235750000 | -0.7629350000 | 3.4367750000  |
| Al | 2.6578890000  | -2.9467640000 | 0.8575000000  |
| Al | 2.1697170000  | 2.2760960000  | 1.1984890000  |
| Al | 3.6022020000  | -1.5597390000 | -1.3943500000 |
| Al | 3.1136620000  | -0.1634830000 | 1.0470090000  |
| Al | 1.4638600000  | 4.2707920000  | -0.4844290000 |
| Al | -2.7500370000 | -2.6246110000 | -1.1925220000 |
| B  | -2.4777870000 | 1.4613350000  | -2.2507960000 |
| B  | -2.2846530000 | -0.2953870000 | -2.2593390000 |
| B  | -3.7164440000 | 0.5216600000  | -2.0496060000 |
| B  | 0.6116300000  | -2.4499290000 | -0.0063600000 |
| B  | -0.6311050000 | -2.5764770000 | -1.0599200000 |
| B  | 1.5212700000  | -1.0015830000 | -0.1609960000 |

|   |               |               |               |
|---|---------------|---------------|---------------|
| B | -0.9391690000 | 0.0861890000  | 0.8881730000  |
| B | 0.6815560000  | 0.5207790000  | 0.2413460000  |
| B | -0.2641190000 | -0.8813060000 | -0.4088060000 |
| B | -0.8975100000 | -1.1871270000 | -2.0353740000 |
| B | 0.9579450000  | 1.9768000000  | -0.6487210000 |
| B | -1.3876100000 | 2.5988640000  | -2.0886080000 |
| B | -3.8199520000 | -0.9680760000 | -1.6392860000 |
| B | -0.0761180000 | 3.0920970000  | -1.4205180000 |

31

energy

|    |               |               |               |
|----|---------------|---------------|---------------|
| Al | 3.0471450000  | 0.0430770000  | -0.2541750000 |
| Al | -1.1465950000 | -1.2912940000 | 1.8222410000  |
| Al | 2.6504010000  | 0.1831280000  | 2.2234940000  |
| Al | 0.0855030000  | 0.9662480000  | 2.6183260000  |
| Al | 0.8063070000  | 0.5544460000  | -2.1197000000 |
| Al | -1.9517310000 | 1.5588540000  | -1.5971850000 |
| Al | -1.4494350000 | -1.2879890000 | -2.5931580000 |
| Al | 1.5526750000  | 2.3806890000  | 0.9378810000  |
| Al | 1.4129830000  | -2.4180500000 | 0.9957160000  |
| Al | 0.9526930000  | -1.5390220000 | 3.5182490000  |
| Al | -3.9248030000 | -1.0726420000 | 1.0595920000  |
| Al | -1.2070810000 | 3.2665220000  | 0.8402480000  |
| Al | -3.7360470000 | -0.3797940000 | -1.6378510000 |
| Al | -2.4971290000 | 1.0934480000  | 1.3460620000  |
| Al | -2.2960430000 | -2.5405950000 | -0.2263150000 |
| Al | 0.4870500000  | 4.5856670000  | -0.7581340000 |
| B  | 2.6019690000  | 1.8008600000  | -1.8695420000 |
| B  | 2.0989660000  | -2.1185360000 | -1.7854760000 |
| B  | 3.1640100000  | 0.4804980000  | -2.3658920000 |
| B  | -0.3907550000 | -2.8237420000 | -1.0169010000 |
| B  | 1.0855710000  | -3.5071260000 | -1.0033350000 |
| B  | -1.7827970000 | -0.3135580000 | -0.2807850000 |
| B  | 0.8890240000  | -0.2510350000 | 0.7740260000  |
| B  | -0.4252640000 | 0.6839320000  | 0.0768700000  |
| B  | -0.1420990000 | -1.0300820000 | -0.4269820000 |
| B  | 0.5037520000  | -1.6563790000 | -1.9472440000 |
| B  | 3.6658970000  | -2.3403380000 | -1.2439520000 |
| B  | 2.6063740000  | -3.4205210000 | -0.7598320000 |
| B  | -0.0753600000 | 2.1508890000  | -0.8856780000 |
| B  | 1.4682980000  | 2.7499910000  | -1.2138200000 |
| B  | 3.4890900000  | -1.0718490000 | -2.1072150000 |

32

energy

|    |               |               |               |
|----|---------------|---------------|---------------|
| Al | -1.6554190000 | -2.2606220000 | 1.9788630000  |
| Al | -0.8736840000 | 0.4048870000  | 2.5238520000  |
| Al | -2.6698390000 | 1.2951950000  | -1.3213770000 |
| Al | 0.7366270000  | 2.3480170000  | 1.2424860000  |
| Al | 0.5963440000  | -1.8744580000 | 3.2134610000  |
| Al | -2.8784710000 | -2.8971340000 | -0.1178910000 |
| Al | -2.1551440000 | 2.6013470000  | 1.3265010000  |
| Al | -3.4639180000 | -1.1350760000 | -2.0387910000 |
| Al | -3.0865390000 | -0.1185060000 | 0.9192010000  |
| Al | 1.7909040000  | 0.4615280000  | 2.9397420000  |
| Al | -0.5966010000 | 4.4369420000  | -0.0118130000 |
| Al | 2.8309360000  | 0.5860290000  | 0.6443080000  |
| Al | -0.1082900000 | 1.0682190000  | -2.3396660000 |
| Al | 1.4608630000  | -2.2011760000 | 0.7629370000  |
| Al | 4.3217420000  | -2.0038200000 | -0.5293370000 |
| Al | -0.9342160000 | -1.4005030000 | -2.8149960000 |
| B  | -1.6198770000 | -0.8741040000 | -0.5850060000 |
| B  | 0.6875280000  | -0.0492290000 | 0.8920360000  |
| B  | -0.8263010000 | 0.5212730000  | 0.1446530000  |
| B  | 0.6201910000  | 2.8155240000  | -1.1335400000 |
| B  | -0.8376370000 | 2.1782560000  | -0.5247650000 |
| B  | 2.2393020000  | 0.4951910000  | -2.1805370000 |
| B  | 2.1435170000  | 2.5629660000  | -0.4898260000 |
| B  | -0.7933040000 | -2.3686930000 | -0.5567580000 |

|   |              |               |               |
|---|--------------|---------------|---------------|
| B | 0.5917960000 | -2.4590490000 | -1.4131110000 |
| B | 0.1191380000 | -0.7886730000 | -0.5486550000 |
| B | 1.1607370000 | -0.8400100000 | -2.0447910000 |
| B | 2.8993050000 | -1.0136370000 | -1.9890450000 |
| B | 2.1981320000 | -2.3250720000 | -1.3913520000 |
| B | 3.2275010000 | 1.6531470000  | -1.2765880000 |
| B | 3.8059060000 | 0.1763600000  | -1.4367620000 |
| B | 1.7643030000 | 2.1074930000  | -2.0473980000 |

18

energy

|    |               |               |               |
|----|---------------|---------------|---------------|
| Al | 1.8910320000  | -0.2126010000 | 1.4365600000  |
| Al | 3.7234980000  | -1.7290270000 | 0.0001490000  |
| Al | 4.0480380000  | 0.7862720000  | -0.0000310000 |
| Al | 1.8901450000  | 2.3803610000  | 0.0003810000  |
| Al | 1.1953680000  | -2.6299360000 | -0.0010110000 |
| Al | -0.2370180000 | 1.2896490000  | -1.4859810000 |
| Al | -2.6535870000 | 0.1887380000  | 1.8462810000  |
| Al | -0.4635150000 | -1.3762900000 | 2.2123090000  |
| Al | -3.5410960000 | -1.4073710000 | -0.0000650000 |
| Al | -0.2374660000 | 1.2898470000  | 1.4851120000  |
| Al | -0.2537690000 | 3.8576750000  | 0.0003180000  |
| Al | -2.3240640000 | 2.2076150000  | -0.0006150000 |
| Al | -1.3934710000 | -2.8701670000 | 0.0013060000  |
| Al | -2.6535580000 | 0.1887020000  | -1.8463640000 |
| Al | 1.8909960000  | -0.2127490000 | -1.4368460000 |
| Al | -0.4641530000 | -1.3772430000 | -2.2115110000 |
| B  | 0.2578380000  | -0.5436800000 | 0.0000870000  |
| B  | -1.3430250000 | -0.4273590000 | -0.0000630000 |

19

energy

|    |               |               |               |
|----|---------------|---------------|---------------|
| Al | -3.7799950000 | 0.7714230000  | 0.4003480000  |
| Al | 2.3315380000  | 2.1487480000  | -0.2792230000 |
| Al | 0.2818590000  | 3.7500180000  | -0.5619720000 |
| Al | -3.4574330000 | -1.3493060000 | -0.9345620000 |
| Al | 0.0985300000  | 1.0506640000  | -1.6416560000 |
| Al | 1.4697870000  | -1.2005420000 | -2.2897040000 |
| Al | 3.4807490000  | -0.0817270000 | -0.9969790000 |
| Al | -1.1691020000 | -1.4019820000 | -2.1655420000 |
| Al | -1.9919480000 | 2.4769210000  | -0.3875670000 |
| Al | 0.6374630000  | -2.7848910000 | -0.1920840000 |
| Al | 0.4718790000  | -1.0925300000 | 2.1275940000  |
| Al | -1.7186430000 | -2.2825530000 | 0.8199170000  |
| Al | 2.8703660000  | -1.8693300000 | 0.8230780000  |
| Al | 2.6356750000  | 0.5657560000  | 1.9798090000  |
| Al | 0.0693150000  | 1.4490540000  | 1.1720740000  |
| Al | -1.9988390000 | 0.1461870000  | 2.2479300000  |
| B  | -1.6990050000 | 0.0870570000  | -0.2308260000 |
| B  | -0.2520400000 | -0.5843430000 | -0.0607000000 |
| B  | 1.3499230000  | -0.2720780000 | -0.0242710000 |

20

energy

|    |               |               |               |
|----|---------------|---------------|---------------|
| Al | 2.2360130000  | -1.5480940000 | 1.4919510000  |
| Al | -2.2381420000 | -1.5484180000 | 1.4901590000  |
| Al | 3.8450240000  | 0.0029820000  | 0.0103420000  |
| Al | 2.3477800000  | -1.6258520000 | -1.4965810000 |
| Al | 0.0051890000  | -2.8581220000 | -1.4386270000 |
| Al | -2.3392610000 | -1.6309960000 | -1.4977520000 |
| Al | -0.0009990000 | -2.9567200000 | 1.4092660000  |
| Al | 0.0008950000  | -0.0004350000 | -2.1116080000 |
| Al | 2.3420690000  | 1.6295680000  | -1.4958560000 |
| Al | -3.8437180000 | -0.0025780000 | 0.0034740000  |
| Al | -0.0020120000 | 0.0002170000  | 2.2269430000  |
| Al | -0.0045020000 | 2.9572110000  | 1.4087500000  |
| Al | -2.3434650000 | 1.6263640000  | -1.4988990000 |
| Al | -2.2400720000 | 1.5456270000  | 1.4901370000  |
| Al | 2.2334390000  | 1.5508850000  | 1.4911480000  |
| Al | -0.0017570000 | 2.8584510000  | -1.4384270000 |

|   |               |               |               |
|---|---------------|---------------|---------------|
| B | 1.4329780000  | -0.0005450000 | -0.1052960000 |
| B | 0.0020630000  | -0.9061130000 | 0.0480170000  |
| B | -1.4286270000 | 0.0000410000  | -0.1058690000 |
| B | 0.0027370000  | 0.9063830000  | 0.0476570000  |

21

energy

|    |               |               |               |
|----|---------------|---------------|---------------|
| Al | -3.5513910000 | -1.9779150000 | -0.9611340000 |
| Al | -2.0852760000 | -1.3421830000 | 1.4302320000  |
| Al | 1.6441020000  | -2.2924290000 | -1.3180470000 |
| Al | 0.1516170000  | 0.1507830000  | 2.2064680000  |
| Al | 0.2782590000  | -2.6479640000 | 1.3433420000  |
| Al | -1.0049700000 | -2.6123660000 | -1.2111930000 |
| Al | 2.6161580000  | -1.4760540000 | 1.6786970000  |
| Al | 3.7932080000  | -0.9886430000 | -0.5797850000 |
| Al | 2.8786160000  | 1.3885860000  | -1.1734930000 |
| Al | -0.2234040000 | 2.8188870000  | 1.1423080000  |
| Al | 0.3112540000  | 0.0465630000  | -2.1633650000 |
| Al | 0.8147050000  | 2.9324740000  | -1.5467710000 |
| Al | 2.3561060000  | 1.5479280000  | 1.4756070000  |
| Al | -1.7306840000 | 2.0981740000  | -1.6464200000 |
| Al | -2.4959920000 | 1.6613550000  | 1.8716220000  |
| Al | -3.4840370000 | 0.5933880000  | -0.3320190000 |
| B  | -1.6199310000 | -0.5394600000 | -0.7938150000 |
| B  | -0.1221330000 | -0.6681790000 | -0.0135820000 |
| B  | 1.5567730000  | -0.3412540000 | -0.0473330000 |
| B  | 0.5959770000  | 1.0383510000  | 0.0479890000  |
| B  | -1.1081940000 | 0.7690210000  | 0.2450160000  |

22

energy

|    |               |               |               |
|----|---------------|---------------|---------------|
| Al | -0.8627790000 | -0.6834230000 | 2.2241900000  |
| Al | -3.0514950000 | 0.0006530000  | 1.0319850000  |
| Al | -2.8723620000 | -2.6803870000 | 0.8208500000  |
| Al | 2.8252250000  | 1.5045190000  | -1.2640550000 |
| Al | 1.8157310000  | 1.6374530000  | 1.5131210000  |
| Al | 0.8536110000  | 3.2328240000  | -0.5238300000 |
| Al | -0.9830190000 | 2.1679060000  | 1.4806630000  |
| Al | -1.7278030000 | 4.0254700000  | -0.4963870000 |
| Al | -2.8512560000 | 1.6731090000  | -1.0717360000 |
| Al | 1.6493680000  | -1.3035920000 | 1.7995970000  |
| Al | -0.2139380000 | -2.9960850000 | 0.8061040000  |
| Al | 3.7615290000  | -0.0629520000 | 1.0833650000  |
| Al | -2.9141400000 | -0.9604930000 | -1.6820270000 |
| Al | 1.7186480000  | -2.4340070000 | -1.1691270000 |
| Al | 3.8240980000  | -0.8745020000 | -1.4041600000 |
| Al | -0.8194480000 | -2.5259960000 | -2.1218340000 |
| B  | -1.3068080000 | -1.2667750000 | -0.0885480000 |
| B  | 0.6093310000  | 0.9166950000  | -0.6606470000 |
| B  | 0.2807290000  | -0.8466740000 | -0.1861710000 |
| B  | -1.0602260000 | 0.3048990000  | -0.5130510000 |
| B  | 1.7868080000  | -0.2147800000 | -0.3164220000 |
| B  | -0.7049570000 | 1.8333460000  | -0.9046350000 |

23

energy

|    |               |               |               |
|----|---------------|---------------|---------------|
| Al | 0.9008640000  | -3.2739890000 | -0.5709670000 |
| Al | -1.5793020000 | -2.9925160000 | -0.3505140000 |
| Al | -3.8543470000 | -1.9306900000 | -0.8091890000 |
| Al | 1.7690280000  | -0.8419770000 | -1.6811990000 |
| Al | -5.1247480000 | -0.1560910000 | 0.6116880000  |
| Al | 4.2344330000  | -0.2368220000 | -0.7666970000 |
| Al | 2.7514520000  | -2.1312780000 | 0.8700800000  |
| Al | 0.1089980000  | -1.2533710000 | 1.0649390000  |
| Al | -2.4471640000 | -0.5162570000 | 1.4220320000  |
| Al | -3.5978390000 | 1.8331350000  | 0.3291520000  |
| Al | 2.2676740000  | 0.6766030000  | 1.1163140000  |
| Al | 1.0069260000  | 3.5430110000  | -0.5189440000 |
| Al | -0.1986160000 | 1.4916190000  | 1.5013400000  |
| Al | -1.5605340000 | 3.3622850000  | 0.0808460000  |

|    |               |               |               |
|----|---------------|---------------|---------------|
| Al | 4.6650070000  | -0.4576740000 | 1.8320420000  |
| Al | 3.0681280000  | 2.0627020000  | -1.3578830000 |
| B  | -0.2364920000 | -1.4737260000 | -1.3743520000 |
| B  | -1.6937810000 | -0.7569130000 | -1.1237030000 |
| B  | -0.1732940000 | 0.1763870000  | -1.1479700000 |
| B  | -1.7896630000 | 1.0380420000  | -0.9308080000 |
| B  | -3.0797020000 | 0.0767050000  | -0.8425240000 |
| B  | 1.0931910000  | 1.2325300000  | -0.7938120000 |
| B  | -0.3861580000 | 1.8423860000  | -0.9967300000 |

24

energy

|    |               |               |               |
|----|---------------|---------------|---------------|
| Al | -0.7558890000 | -3.3700170000 | 0.3090380000  |
| Al | 0.0875740000  | -0.9372650000 | 1.0532190000  |
| Al | 2.7643650000  | -0.3635350000 | 1.4919120000  |
| Al | 5.2213210000  | 0.1476320000  | 0.2187050000  |
| Al | 1.7464630000  | -2.9385940000 | 0.1176230000  |
| Al | 3.9200420000  | -1.8910100000 | -0.7497170000 |
| Al | 1.3793690000  | 3.3434350000  | -0.6757430000 |
| Al | 3.4311960000  | 1.9736340000  | -0.0756060000 |
| Al | -1.9003600000 | 0.9871160000  | 1.4694290000  |
| Al | -3.5995200000 | 2.1635440000  | -0.6763140000 |
| Al | 0.8084050000  | 1.6717460000  | 1.3958380000  |
| Al | -1.1100910000 | 3.1676230000  | -0.1575890000 |
| Al | -2.5790800000 | -1.6012030000 | 1.2228290000  |
| Al | -4.5694430000 | 0.2646520000  | 1.0104260000  |
| Al | -1.7120480000 | -1.4663950000 | -1.5665370000 |
| Al | -4.2904950000 | -1.4032240000 | -1.1215560000 |
| B  | 0.3091220000  | -1.7250860000 | -1.2163150000 |
| B  | 1.7402940000  | -0.9341270000 | -1.2251320000 |
| B  | 0.1670570000  | -0.0924970000 | -1.2967490000 |
| B  | 0.1332570000  | 1.5574310000  | -1.2010800000 |
| B  | 3.0281250000  | 0.0372030000  | -0.9612250000 |
| B  | 1.6274640000  | 0.8775980000  | -1.0946830000 |
| B  | -1.2750050000 | 0.8067720000  | -0.9340450000 |
| B  | -2.7190170000 | 0.1275430000  | -0.5622600000 |

25

energy

|    |               |               |               |
|----|---------------|---------------|---------------|
| Al | -1.0789290000 | -3.3046120000 | -0.3868290000 |
| Al | 0.4596620000  | -1.2058660000 | 1.3791070000  |
| Al | 3.0210850000  | -0.4593090000 | 1.4982930000  |
| Al | 5.2333230000  | -0.0362940000 | -0.0166810000 |
| Al | 1.5760100000  | -3.1454330000 | -0.1717390000 |
| Al | 3.8099640000  | -2.0011410000 | -0.8923240000 |
| Al | 1.5708250000  | 3.4165950000  | -0.8474620000 |
| Al | 3.5838540000  | 1.9517860000  | -0.1806790000 |
| Al | -1.5386210000 | 0.9099110000  | 1.6331790000  |
| Al | -3.1989570000 | 2.2080190000  | -0.3989380000 |
| Al | 1.1483280000  | 1.5602500000  | 1.3056150000  |
| Al | -0.8120340000 | 3.1787810000  | 0.1826520000  |
| Al | -2.1439570000 | -1.6822930000 | 1.5140950000  |
| Al | -4.0906160000 | 0.0421720000  | 1.2449990000  |
| Al | -4.9153230000 | 0.4090600000  | -1.3219360000 |
| Al | -3.4812300000 | -1.9142420000 | -0.9974580000 |
| B  | -1.1892950000 | -0.8786260000 | -0.8938170000 |
| B  | 0.2142240000  | -1.6119530000 | -1.2278200000 |
| B  | 1.6773670000  | -0.9006840000 | -1.0752370000 |
| B  | 0.2040690000  | 0.0209580000  | -1.4066950000 |
| B  | 0.2426390000  | 1.6590090000  | -1.2733600000 |
| B  | 3.0396500000  | -0.0073730000 | -0.9192990000 |
| B  | 1.6915360000  | 0.9059460000  | -1.0930700000 |
| B  | -1.1706980000 | 0.9564590000  | -0.8930600000 |
| B  | -2.4822920000 | 0.0450660000  | -0.4317700000 |

2

energy

|    |              |              |               |
|----|--------------|--------------|---------------|
| Al | 0.0000000000 | 0.0000000000 | 1.5271450000  |
| Al | 0.0000000000 | 0.0000000000 | -1.5271450000 |

3

energy  
Al -0.4966620000 -1.2057820000 0.0000000000  
Al 0.0000000000 1.3040610000 0.0000000000  
B 1.2913210000 -0.2555270000 0.0000000000

12  
energy  
Al -1.5112670000 1.4630830000 0.0004500000  
Al -2.6125390000 -0.8151000000 0.0006810000  
B 1.7001820000 2.1734950000 0.0003360000  
B 0.6010140000 0.8925700000 -0.0010590000  
B -0.3641060000 -0.5001870000 -0.0006070000  
B 0.5553070000 -2.1869960000 -0.0001470000  
B 1.3779390000 -0.6007140000 -0.0001430000  
B 2.1636260000 -2.0282060000 0.0006170000  
B 3.0040970000 -0.7365970000 -0.0001260000  
B -1.0029940000 -1.9930350000 -0.0011240000  
B 2.4813010000 0.7757430000 -0.0000210000  
B 0.2055300000 2.5191700000 -0.0006650000

13  
energy  
Al 1.0433570000 2.3154540000 0.2286790000  
Al 3.4507500000 -0.8267800000 -0.2106660000  
B -2.6640480000 -1.2805510000 -0.0741310000  
B -1.6994690000 0.3074610000 -0.4196670000  
B -3.3283940000 0.1858080000 -0.0707730000  
B -2.6388250000 1.5805270000 -0.0502940000  
B -1.0543350000 1.8380430000 -0.0088450000  
B -0.1305000000 -2.4388630000 0.4088860000  
B -0.8783310000 -1.1057430000 -0.1402010000  
B 0.8024030000 -1.1273810000 0.2930200000  
B -0.0160060000 0.4179250000 -0.1465200000  
B -1.6691130000 -2.5068420000 0.1788420000  
B 1.5919420000 0.2590650000 -0.0171520000

14  
energy  
Al 1.4124850000 1.8375680000 -0.0343140000  
Al -1.6602830000 -0.2876500000 1.6008330000  
B 0.1186430000 -0.1013140000 -0.2474620000  
B -3.0367740000 0.2080570000 -0.7263350000  
B -1.3494730000 0.1315580000 -0.9699230000  
B -2.4107130000 -1.2073510000 -0.7807120000  
B -0.8616830000 -1.5428300000 -0.6811600000  
B -0.6207620000 1.4612580000 -0.1092710000  
B -2.1963830000 1.4589830000 -0.3403330000  
B 0.6645650000 -1.7999980000 -0.2540280000  
B 2.2137000000 -1.9902140000 0.1119830000  
B 3.3095450000 -0.8804900000 0.1431560000  
B 1.7684410000 -0.3999690000 -0.2979680000  
B 3.0451680000 0.6325230000 0.0791030000

15  
energy  
Al -1.5980660000 1.5999230000 -0.0055350000  
Al 1.6025060000 1.6001960000 -0.0033050000  
B 0.8193410000 -0.7068230000 -1.5651930000  
B 2.3745650000 -0.4335910000 -1.3737250000  
B 3.1279980000 -0.3950890000 0.0000660000  
B 2.3754660000 -0.4253440000 1.3746210000  
B 1.6041610000 -1.0719430000 0.0026150000  
B 0.8203270000 -0.6972540000 1.5686670000  
B -0.0010910000 -0.8718700000 0.0024230000  
B -0.8211850000 -0.6963340000 1.5689940000  
B -3.1294260000 -0.3912190000 0.0019580000  
B -0.8222070000 -0.7063290000 -1.5646600000  
B -2.3761190000 -0.4226120000 1.3759890000  
B -1.6064320000 -1.0707580000 0.0035410000  
B -2.3769420000 -0.4311430000 -1.3723100000

16

energy  
Al -1.8392190000 -0.3671890000 1.3229830000  
Al 1.9497900000 -0.4858930000 -1.3159660000  
B -0.5941550000 0.7962980000 -0.8691030000  
B -0.9310960000 2.3879520000 -0.3271030000  
B -0.5145770000 -2.2186360000 -0.1815830000  
B -2.1325830000 1.4754030000 -0.7337340000  
B -2.1527700000 -0.0920610000 -1.0203580000  
B -0.4856760000 -0.7967320000 -1.1496900000  
B -1.8691370000 -1.6146070000 -0.6655430000  
B 2.0668360000 -1.1671660000 0.9391350000  
B 2.0991220000 0.4137150000 0.9879390000  
B 0.5395610000 -0.5159370000 1.1397600000  
B 0.3912790000 1.0443790000 0.6104540000  
B 0.5699390000 2.6628220000 0.1046600000  
B 1.8402270000 1.9283430000 0.6029510000  
B 0.8855450000 -2.0857610000 0.5439720000

17

energy  
Al 3.7367740000 0.3360730000 0.7138980000  
Al 1.9563190000 -1.9881450000 -0.1189380000  
B -1.0272720000 0.7281180000 -0.4809220000  
B -1.3818370000 -0.9571540000 -0.5123080000  
B 0.5690120000 1.1015080000 -0.2066130000  
B -0.2780320000 -2.1026550000 -0.0620520000  
B 1.8141930000 0.0685270000 -0.6079730000  
B -1.8022350000 -2.4135100000 0.1795000000  
B -3.0840400000 -1.4896380000 0.2807480000  
B -0.6181560000 2.3791670000 -0.1558590000  
B 0.9507990000 2.7095740000 -0.2429740000  
B -2.1517170000 1.8928150000 0.1687470000  
B -2.5356550000 0.2113870000 -0.0339060000  
B -4.0121510000 -0.2086390000 0.5116180000  
B 2.1095070000 1.6471030000 -0.3246600000  
B 0.2693710000 -0.5584640000 -0.5674650000  
B -3.6238270000 1.2872470000 0.5072260000

18

energy  
Al 3.2444650000 -1.6735200000 -0.9576950000  
Al -3.2386680000 -1.6733200000 -0.9606520000  
B 1.6260540000 -1.6311060000 0.7988560000  
B 1.6475280000 1.2158880000 0.4384470000  
B 0.8424270000 -0.1879260000 1.0657340000  
B 2.4775500000 -0.3014940000 0.6823060000  
B 3.1384680000 0.8710980000 -0.2068760000  
B 2.3902210000 2.1612310000 -0.6607540000  
B 0.8338140000 2.4476740000 -0.4065770000  
B -0.8416690000 -0.1897160000 1.0671670000  
B -2.4770310000 -0.3079480000 0.6863990000  
B 0.0023760000 -1.7194370000 0.9318660000  
B -1.6215090000 -1.6352060000 0.7995370000  
B -0.0019070000 1.3071390000 0.6227720000  
B -1.6513670000 1.2112030000 0.4396740000  
B -2.3971120000 2.1539020000 -0.6595780000  
B -3.1413440000 0.8613360000 -0.2052390000  
B -0.8415700000 2.4451440000 -0.4060300000

4

energy  
Al 1.7680460000 -0.2948780000 0.0000040000  
Al -1.7682030000 -0.2947840000 0.0000250000  
B 0.0002690000 0.7666170000 0.7373880000  
B 0.0001390000 0.7665060000 -0.7374650000

5

energy  
Al 1.7298050000 -0.0761710000 0.0000000000  
Al -0.6110410000 -1.2866540000 -0.0000000000  
B -1.6375010000 0.4706820000 -0.0000000000

|   |               |              |              |
|---|---------------|--------------|--------------|
| B | -1.2712840000 | 1.9559660000 | 0.0000000000 |
| B | 0.0000000000  | 1.1166970000 | 0.0000000000 |

6

|        |               |               |               |
|--------|---------------|---------------|---------------|
| energy |               |               |               |
| Al     | 2.1062880000  | -0.8454200000 | -0.0001460000 |
| Al     | -2.1058980000 | -0.8459020000 | -0.0000990000 |
| B      | -0.8559600000 | 1.1210780000  | 0.0000830000  |
| B      | -0.0005950000 | 2.4195560000  | -0.0003770000 |
| B      | 0.8553560000  | 1.1215250000  | 0.0003810000  |
| B      | 0.0001850000  | -0.2647190000 | 0.0005490000  |

7

|        |               |               |               |
|--------|---------------|---------------|---------------|
| energy |               |               |               |
| Al     | 1.7318960000  | -0.4301080000 | 0.0001240000  |
| Al     | -1.1779070000 | -1.2008130000 | 0.0003670000  |
| B      | -1.1191800000 | 1.0665790000  | 0.7788310000  |
| B      | -1.1198460000 | 1.0649280000  | -0.7788110000 |
| B      | 0.2272460000  | 0.3414090000  | -1.2718650000 |
| B      | 0.3437920000  | 1.4249390000  | -0.0009370000 |
| B      | 0.2276170000  | 0.3425370000  | 1.2715050000  |

8

|        |               |               |               |
|--------|---------------|---------------|---------------|
| energy |               |               |               |
| Al     | 2.2689740000  | 0.1187630000  | -0.0000090000 |
| Al     | -1.1691440000 | 1.3937030000  | 0.0000330000  |
| B      | -0.0482950000 | -1.2981790000 | -0.0000990000 |
| B      | 0.5007890000  | -0.0537670000 | 1.0299520000  |
| B      | -1.7835180000 | -1.2528000000 | 0.0000420000  |
| B      | -1.0145510000 | -0.6370320000 | 1.2142330000  |
| B      | -1.0146830000 | -0.6369710000 | -1.2142160000 |
| B      | 0.5007010000  | -0.0536620000 | -1.0299750000 |

9

|        |               |               |               |
|--------|---------------|---------------|---------------|
| energy |               |               |               |
| Al     | 0.0001700000  | 0.0000030000  | 1.2934620000  |
| Al     | -0.0001700000 | 0.0000070000  | -1.2931360000 |
| B      | 1.6599600000  | 0.7507210000  | -0.0002640000 |
| B      | 1.6218920000  | -0.8297290000 | -0.0002640000 |
| B      | 0.3624770000  | -1.7851180000 | -0.0001880000 |
| B      | -1.1697550000 | -1.3964950000 | -0.0000080000 |
| B      | 0.4479630000  | 1.7655990000  | -0.0001920000 |
| B      | -1.1011920000 | 1.4511500000  | -0.0000130000 |
| B      | -1.8213440000 | 0.0438450000  | 0.0000810000  |

10

|        |               |               |               |
|--------|---------------|---------------|---------------|
| energy |               |               |               |
| Al     | -2.3254280000 | -0.5510180000 | 0.0017230000  |
| Al     | 2.3295910000  | -0.5433400000 | -0.0017400000 |
| B      | -0.0000140000 | 0.4030190000  | 0.0000350000  |
| B      | -0.0021530000 | 1.4377280000  | 1.4134720000  |
| B      | 0.0045500000  | -1.2686100000 | 0.7476220000  |
| B      | 0.0034270000  | -0.0770230000 | 1.7277820000  |
| B      | 0.0023650000  | -1.2443540000 | -0.7973420000 |
| B      | -0.0082310000 | 1.4812520000  | -1.3790370000 |
| B      | -0.0031180000 | -0.0231870000 | -1.7403370000 |
| B      | -0.0076480000 | 2.1365060000  | 0.0278500000  |

11

|        |               |               |               |
|--------|---------------|---------------|---------------|
| energy |               |               |               |
| Al     | -0.6954730000 | 0.3337510000  | 1.6464350000  |
| Al     | 2.4179070000  | -0.6507830000 | 0.0881280000  |
| B      | -0.9101250000 | -0.3811760000 | -0.8701800000 |
| B      | -1.0549690000 | -1.9173410000 | -0.2043070000 |
| B      | 0.6108610000  | 0.2540050000  | -0.7435890000 |
| B      | 0.4108590000  | -1.3768780000 | -0.4057950000 |
| B      | -1.0663080000 | 1.4463260000  | -0.7235640000 |
| B      | 0.4169300000  | 1.9735540000  | -0.5217000000 |
| B      | 1.7757480000  | 1.3058910000  | -0.2289850000 |
| B      | -2.3417130000 | -1.0131170000 | -0.2813220000 |
| B      | -2.3196110000 | 0.5330200000  | -0.5304210000 |

3

energy

|    |               |               |              |
|----|---------------|---------------|--------------|
| Al | -0.0000000000 | -1.4648710000 | 0.0000000000 |
| Al | -1.2686210000 | 0.7324380000  | 0.0000000000 |
| Al | 1.2686210000  | 0.7324320000  | 0.0000000000 |

4

energy

|    |               |               |               |
|----|---------------|---------------|---------------|
| Al | 1.2787390000  | -1.2906740000 | -0.0000030000 |
| Al | -2.4519050000 | -0.0003140000 | -0.0000050000 |
| Al | 1.2776600000  | 1.2911320000  | -0.0000030000 |
| B  | -0.2716850000 | -0.0003760000 | 0.0000300000  |

13

energy

|    |               |               |               |
|----|---------------|---------------|---------------|
| Al | 0.9354260000  | -2.4086700000 | -0.2622090000 |
| Al | 3.6303100000  | 0.4187410000  | 0.1895140000  |
| Al | -1.6538660000 | -2.0247080000 | 0.1987150000  |
| B  | -2.0661110000 | 2.1587730000  | -0.0626610000 |
| B  | -0.7762160000 | 3.0882990000  | -0.0812310000 |
| B  | -3.0626980000 | -0.5569980000 | 0.1214770000  |
| B  | -1.6108710000 | 0.2241730000  | -0.0330770000 |
| B  | -3.1370850000 | 0.9669960000  | 0.0211380000  |
| B  | -0.4611240000 | 1.4857120000  | -0.1079140000 |
| B  | 0.0228680000  | -0.1999610000 | -0.0419280000 |
| B  | 0.6997770000  | 2.6309970000  | -0.0637660000 |
| B  | 1.2115340000  | 1.0962320000  | -0.0503770000 |
| B  | 1.6090640000  | -0.4561650000 | -0.0293120000 |

14

energy

|    |               |               |               |
|----|---------------|---------------|---------------|
| Al | 3.4271710000  | -0.5914170000 | 0.1954620000  |
| Al | -2.0500360000 | 0.0815210000  | 1.6212420000  |
| Al | 1.1394990000  | -1.5986640000 | -0.2169100000 |
| B  | -2.4611070000 | -1.5526730000 | -0.4240990000 |
| B  | -1.6850960000 | -0.1303600000 | -0.9425490000 |
| B  | -0.2369990000 | 0.1849390000  | -0.1577830000 |
| B  | -0.8862370000 | -1.4833230000 | -0.2008930000 |
| B  | 1.7256500000  | 2.2851550000  | -0.0128370000 |
| B  | 1.4400750000  | 0.6157310000  | -0.2184690000 |
| B  | 0.2010220000  | 1.9450050000  | -0.2732070000 |
| B  | 2.9142580000  | 1.3370760000  | 0.0027990000  |
| B  | -1.3252670000 | 1.5237670000  | -0.5337510000 |
| B  | -3.3818440000 | -0.3488790000 | -0.7263800000 |
| B  | -2.8477020000 | 1.1058160000  | -0.6722970000 |

15

energy

|    |               |               |               |
|----|---------------|---------------|---------------|
| Al | -1.8807520000 | -0.0007920000 | 1.2363040000  |
| Al | 0.6924070000  | 0.0000870000  | 1.3361960000  |
| Al | 1.5668410000  | -0.0001940000 | -1.3557740000 |
| B  | -0.4770400000 | -0.8302260000 | -0.6949840000 |
| B  | -2.0742240000 | -1.5129190000 | -0.6800260000 |
| B  | -2.4467080000 | 0.0001910000  | -0.9332900000 |
| B  | 2.0917470000  | -1.4114000000 | 0.3481270000  |
| B  | -0.8612620000 | -2.3978500000 | -0.3120720000 |
| B  | 0.6912460000  | -2.0263850000 | -0.0456360000 |
| B  | -0.8616970000 | 2.3980590000  | -0.3116260000 |
| B  | -0.4777630000 | 0.8304730000  | -0.6948180000 |
| B  | 0.6907670000  | 2.0268980000  | -0.0454520000 |
| B  | 2.0913410000  | 1.4118600000  | 0.3478180000  |
| B  | 2.7243120000  | 0.0003700000  | 0.5380140000  |
| B  | -2.0748090000 | 1.5132680000  | -0.6795420000 |

16

energy

|    |               |               |               |
|----|---------------|---------------|---------------|
| Al | 2.0842820000  | 0.0210560000  | -1.4188220000 |
| Al | 0.8163800000  | -0.0178820000 | 1.2597960000  |
| Al | -1.8585970000 | -0.0283420000 | 1.4433710000  |
| B  | 0.4769660000  | 1.6164930000  | -0.5009660000 |
| B  | 1.8801870000  | 1.7399980000  | 0.1836340000  |
| B  | 2.8576180000  | 0.7594200000  | 0.8753780000  |
| B  | 2.8560530000  | -0.7889780000 | 0.8504400000  |
| B  | 1.8767800000  | -1.7459730000 | 0.1289230000  |

|   |               |               |               |
|---|---------------|---------------|---------------|
| B | -0.1915980000 | 0.0132850000  | -0.7980610000 |
| B | -2.6819480000 | 1.4032290000  | -0.4056690000 |
| B | -2.6850960000 | -1.3832240000 | -0.4496640000 |
| B | -3.4180900000 | 0.0098030000  | -0.3446980000 |
| B | -1.1582440000 | -1.5849630000 | -0.7139940000 |
| B | -1.1544790000 | 1.6091130000  | -0.6640730000 |
| B | 0.4725150000  | -1.6002650000 | -0.5492780000 |
| B | -1.8400340000 | 0.0174990000  | -0.9512690000 |

17

energy

|    |               |               |               |
|----|---------------|---------------|---------------|
| Al | -0.2915470000 | 2.6227150000  | -0.9550700000 |
| Al | -1.1777830000 | 0.1458930000  | -1.3113550000 |
| Al | -1.1245200000 | -1.0140460000 | 1.4718580000  |
| B  | -2.8466610000 | -0.5131870000 | 0.0900340000  |
| B  | -2.1015820000 | -1.7412200000 | -0.4734620000 |
| B  | -0.6168910000 | -2.3485570000 | -0.5838420000 |
| B  | 0.9018450000  | -2.6937520000 | -0.6685990000 |
| B  | 0.5466580000  | -1.0947190000 | -0.1693410000 |
| B  | 2.2365780000  | -1.8812160000 | -0.4555210000 |
| B  | -2.2630710000 | 0.7754590000  | 0.7315880000  |
| B  | 0.4351710000  | 0.4268310000  | 0.4476010000  |
| B  | -0.8655450000 | 1.4201740000  | 1.1304720000  |
| B  | 2.0065880000  | 1.4517150000  | 0.7193290000  |
| B  | 0.5827800000  | 2.0613040000  | 1.0565710000  |
| B  | 1.9686350000  | -0.2337530000 | 0.1634550000  |
| B  | 3.4303100000  | -0.8281680000 | -0.2052070000 |
| B  | 3.3291930000  | 0.6372280000  | 0.2827990000  |

18

energy

|    |               |               |               |
|----|---------------|---------------|---------------|
| Al | 1.8389610000  | -2.1665310000 | -0.4313110000 |
| Al | -1.3181800000 | -1.2657700000 | 1.6698750000  |
| Al | 3.3450160000  | 0.0857850000  | 0.8320700000  |
| B  | -1.5138180000 | -1.0122940000 | -0.9099040000 |
| B  | -2.7827180000 | 0.1122340000  | -0.1822070000 |
| B  | -1.8845650000 | -2.5441840000 | -0.4106620000 |
| B  | -0.3220640000 | -2.2578160000 | -0.5528870000 |
| B  | -2.9731960000 | -1.4658420000 | -0.2011210000 |
| B  | -2.3285090000 | 1.6692440000  | 0.0345560000  |
| B  | -1.7209730000 | 3.1422510000  | 0.3949060000  |
| B  | -1.1151290000 | 0.5509780000  | -0.5206790000 |
| B  | -0.7040870000 | 2.1687240000  | -0.4251640000 |
| B  | -0.2537270000 | 3.6097330000  | 0.2138630000  |
| B  | 0.1545440000  | -0.6409670000 | -0.7117130000 |
| B  | 0.5479850000  | 1.0846470000  | -0.6940510000 |
| B  | 2.0973960000  | 1.5317050000  | -0.4041140000 |
| B  | 1.7283030000  | 0.0172220000  | -0.8170100000 |
| B  | 1.0194870000  | 2.7353060000  | -0.1974600000 |

19

energy

|    |               |               |               |
|----|---------------|---------------|---------------|
| Al | -1.0502690000 | -1.3137550000 | 1.0633170000  |
| Al | -3.4826580000 | -0.3213560000 | 0.5526110000  |
| Al | 1.4356140000  | -0.4229420000 | 1.4792810000  |
| B  | -0.9916960000 | -1.9730150000 | -1.0574630000 |
| B  | -0.6086890000 | 0.8759960000  | -1.0964840000 |
| B  | -1.6370050000 | -0.5272810000 | -1.2005400000 |
| B  | 1.0988830000  | 0.6276210000  | -0.9596080000 |
| B  | 1.7488850000  | -0.8506270000 | -0.9638950000 |
| B  | 0.4398870000  | 2.1014220000  | -0.5590570000 |
| B  | 2.8193380000  | 0.3876730000  | -0.0822370000 |
| B  | 2.0622230000  | -2.3494970000 | -0.2769550000 |
| B  | 0.5250270000  | -2.3732070000 | -0.7582930000 |
| B  | 3.0634670000  | -1.2033010000 | 0.0065770000  |
| B  | 2.1081400000  | 1.8026630000  | 0.2049860000  |
| B  | 0.0873110000  | -0.6706360000 | -1.1625880000 |
| B  | -1.3299640000 | 2.2502110000  | -0.3413220000 |
| B  | -2.2170440000 | 0.9135470000  | -0.6763490000 |
| B  | 1.1949860000  | 3.0543840000  | 0.5709280000  |

|        |               |               |               |
|--------|---------------|---------------|---------------|
| B      | -0.3107350000 | 3.2849850000  | 0.3047570000  |
| 5      |               |               |               |
| energy |               |               |               |
| Al     | 1.4534940000  | 1.3716100000  | -0.0018570000 |
| Al     | 1.4532560000  | -1.3714610000 | -0.0017940000 |
| Al     | -2.4846280000 | 0.0004040000  | -0.0037760000 |
| B      | -0.5490220000 | -0.7827480000 | 0.0094970000  |
| B      | -0.5484980000 | 0.7813120000  | 0.0098130000  |
| 6      |               |               |               |
| energy |               |               |               |
| Al     | -1.9410460000 | -1.4592060000 | -0.0000900000 |
| Al     | 2.2343790000  | -0.9511460000 | -0.0000810000 |
| Al     | -0.2933630000 | 2.4105350000  | -0.0000890000 |
| B      | -0.8757480000 | 0.3727370000  | 0.0002630000  |
| B      | 0.1150110000  | -0.9451230000 | 0.0002110000  |
| B      | 0.7608150000  | 0.5719100000  | 0.0002040000  |
| 7      |               |               |               |
| energy |               |               |               |
| Al     | -1.8736490000 | -0.5206320000 | -0.4490790000 |
| Al     | -0.2361380000 | 1.6179500000  | -0.1549480000 |
| Al     | 1.6580520000  | -0.3267120000 | -0.8975990000 |
| B      | -0.0788390000 | -1.4548880000 | 0.1171220000  |
| B      | 0.9882260000  | -0.9196670000 | 1.1799840000  |
| B      | -0.5609180000 | -0.2546780000 | 1.2428450000  |
| B      | 0.8260430000  | 0.6256600000  | 1.3642770000  |
| 8      |               |               |               |
| energy |               |               |               |
| Al     | 1.6844230000  | 0.5327050000  | -1.0263720000 |
| Al     | -2.3689210000 | -0.3012710000 | -0.2877500000 |
| Al     | -0.5154580000 | 1.3286090000  | 0.4183180000  |
| B      | 1.0446850000  | 0.2947650000  | 1.4433000000  |
| B      | -0.0644700000 | -0.8084710000 | 0.8770530000  |
| B      | 1.6641950000  | -1.0698970000 | 1.0460350000  |
| B      | -0.4873330000 | -0.9606120000 | -0.7516340000 |
| B      | 0.9628070000  | -1.5118970000 | -0.2856620000 |
| 9      |               |               |               |
| energy |               |               |               |
| Al     | 0.9178710000  | -0.7527060000 | -1.4614790000 |
| Al     | 1.3100540000  | 1.4068190000  | 0.0016320000  |
| Al     | 0.9169980000  | -0.7564640000 | 1.4605770000  |
| B      | -0.2405560000 | -1.7109010000 | -0.0019720000 |
| B      | -2.0868560000 | 1.3879070000  | 0.0009780000  |
| B      | -0.6306650000 | 1.9008880000  | 0.0001270000  |
| B      | -2.5894750000 | -0.0770540000 | 0.0002030000  |
| B      | -0.8818640000 | 0.1554860000  | -0.0000910000 |
| B      | -1.7473860000 | -1.3902170000 | -0.0011450000 |
| 10     |               |               |               |
| energy |               |               |               |
| Al     | 0.7001090000  | -0.0024620000 | -1.4571840000 |
| Al     | 0.6981880000  | 0.0024940000  | 1.4555330000  |
| Al     | -3.3480030000 | 0.0000640000  | -0.0000670000 |
| B      | 2.3067840000  | -0.7899800000 | 0.0027110000  |
| B      | 2.3099030000  | 0.7837280000  | 0.0000180000  |
| B      | 1.1413920000  | 1.8090410000  | -0.0017520000 |
| B      | -0.3537150000 | 1.4006800000  | -0.0021320000 |
| B      | 1.1343930000  | -1.8108790000 | 0.0041310000  |
| B      | -0.3590270000 | -1.3964480000 | 0.0021450000  |
| B      | -1.1104940000 | 0.0036070000  | -0.0006540000 |
| 11     |               |               |               |
| energy |               |               |               |
| Al     | 1.1332230000  | -0.3648210000 | 1.5957950000  |
| Al     | -2.3961500000 | -1.0343380000 | 0.0887450000  |
| Al     | -1.8993320000 | 1.5784660000  | -0.0126350000 |
| B      | 0.8960550000  | -1.5069280000 | -0.8094800000 |
| B      | 2.8082120000  | 0.4990570000  | -0.3815790000 |
| B      | 0.2034460000  | 1.4574490000  | -0.3029910000 |
| B      | -0.3885730000 | -0.0931210000 | -0.5454740000 |

|   |               |               |               |
|---|---------------|---------------|---------------|
| B | 1.2136370000  | 0.2555300000  | -0.9138060000 |
| B | 1.7623670000  | 1.6477460000  | -0.1565790000 |
| B | 2.3732260000  | -0.9717320000 | -0.6555290000 |
| B | -0.6464970000 | -1.7541980000 | -0.5815150000 |

12

energy

|    |               |               |               |
|----|---------------|---------------|---------------|
| Al | 0.0107120000  | -1.8748980000 | -0.0007770000 |
| Al | -2.4615590000 | -1.5343910000 | 0.0008150000  |
| Al | 2.4793600000  | -1.5072560000 | 0.0010190000  |
| B  | 2.4755070000  | 0.4742070000  | -0.0009470000 |
| B  | 0.8538380000  | 0.1521860000  | -0.0001640000 |
| B  | -0.8558060000 | 0.1419260000  | -0.0005980000 |
| B  | -1.7794360000 | 1.8505000000  | -0.0000580000 |
| B  | -0.0098250000 | 1.6495650000  | -0.0008450000 |
| B  | -0.7850360000 | 3.0949760000  | 0.0006710000  |
| B  | 0.7499950000  | 3.1033280000  | 0.0005850000  |
| B  | -2.4810620000 | 0.4468820000  | -0.0008360000 |
| B  | 1.7576910000  | 1.8694480000  | -0.0005580000 |

4

energy

|    |               |               |              |
|----|---------------|---------------|--------------|
| Al | 1.1407960000  | -1.8477080000 | 0.0000000000 |
| Al | -1.1407960000 | 1.8477080000  | 0.0000000000 |
| Al | 1.1407960000  | 0.8391850000  | 0.0000000000 |
| Al | -1.1407960000 | -0.8391850000 | 0.0000000000 |

5

energy

|    |               |               |               |
|----|---------------|---------------|---------------|
| Al | 0.2745070000  | -1.9626960000 | -0.0006210000 |
| Al | -2.3875560000 | -0.0024120000 | 0.0003190000  |
| Al | 0.2691630000  | 1.9631080000  | 0.0000660000  |
| Al | 1.9921280000  | 0.0022680000  | 0.0003340000  |
| B  | -0.3854300000 | -0.0006940000 | -0.0002530000 |

14

energy

|    |               |               |               |
|----|---------------|---------------|---------------|
| Al | -1.8938830000 | -1.9021120000 | 0.0320020000  |
| Al | 0.7713860000  | 0.7355640000  | 1.3794370000  |
| Al | 2.9593220000  | -0.7898480000 | -0.1394260000 |
| Al | 0.6288070000  | -1.7947610000 | 0.2425370000  |
| B  | 1.0210720000  | 0.2026900000  | -1.0248600000 |
| B  | -0.2433730000 | 2.6091900000  | 0.0642780000  |
| B  | -0.3922990000 | 1.1632770000  | -0.7893510000 |
| B  | -3.0310070000 | 1.1043170000  | 0.2392800000  |
| B  | -0.4383860000 | -0.4215840000 | -1.0873010000 |
| B  | -1.8631210000 | 0.2629420000  | -0.6025680000 |
| B  | -1.7084600000 | 2.0279280000  | 0.1122560000  |
| B  | -3.2571790000 | -0.3748800000 | 0.0703700000  |
| B  | 1.1711010000  | 2.1210530000  | -0.4405280000 |
| B  | 2.3310070000  | 1.0580730000  | -0.4794040000 |

15

energy

|    |               |               |               |
|----|---------------|---------------|---------------|
| Al | 1.9706910000  | -2.2402850000 | -0.1265960000 |
| Al | -0.8291480000 | -0.0660960000 | 1.3341830000  |
| Al | -1.5143030000 | -0.5258100000 | -1.3734820000 |
| Al | 1.4780400000  | 1.0952740000  | 1.2503190000  |
| B  | -1.5775720000 | 1.7597310000  | -0.2021200000 |
| B  | 1.1624670000  | 2.4504840000  | -0.7104810000 |
| B  | -2.7755360000 | -0.8160290000 | 0.5211730000  |
| B  | -0.1713150000 | -1.9361810000 | 0.0196830000  |
| B  | -1.6807420000 | -1.9188940000 | 0.4365360000  |
| B  | -0.3244140000 | 2.7147520000  | -0.4634060000 |
| B  | 0.0353520000  | 1.0830190000  | -0.6723510000 |
| B  | -2.6556680000 | 0.6896460000  | 0.2100720000  |
| B  | 0.6282410000  | -0.5169320000 | -0.5005590000 |
| B  | 2.1805110000  | 1.2719370000  | -0.8801390000 |
| B  | 2.3049460000  | -0.2655470000 | -0.5779070000 |

16

energy

|    |               |              |              |
|----|---------------|--------------|--------------|
| Al | -0.3631600000 | 0.9765600000 | 1.2935230000 |
|----|---------------|--------------|--------------|

|    |               |               |               |
|----|---------------|---------------|---------------|
| Al | 1.2286090000  | 0.9283260000  | -1.1384860000 |
| Al | 2.6551630000  | -1.2569890000 | -0.5865900000 |
| Al | -2.2837710000 | -0.6873720000 | 0.9904230000  |
| B  | 1.2867660000  | 2.2762590000  | 0.6432600000  |
| B  | 1.8493350000  | 0.9102890000  | 1.1651260000  |
| B  | 1.3992220000  | -0.5958780000 | 1.2415020000  |
| B  | 0.9338550000  | -2.0739350000 | 0.8013680000  |
| B  | 0.0741390000  | -0.8688940000 | -0.0276670000 |
| B  | -0.3427850000 | -2.5322520000 | 0.0327260000  |
| B  | -0.9111470000 | 0.1415060000  | -0.8837180000 |
| B  | -1.2584720000 | 1.9104770000  | -0.8029730000 |
| B  | -2.3839710000 | -0.6754500000 | -1.3507270000 |
| B  | 0.0028250000  | 2.6341900000  | -0.1543350000 |
| B  | -2.3513370000 | 0.8688900000  | -1.3044230000 |
| B  | -1.5142160000 | -1.8925650000 | -0.8132030000 |

17

energy

|    |               |               |               |
|----|---------------|---------------|---------------|
| Al | 1.6134470000  | -0.8004710000 | 0.9301360000  |
| Al | -1.5205650000 | -1.0396250000 | 0.8960160000  |
| Al | -0.0322450000 | -0.0324400000 | 2.6976680000  |
| Al | -0.1492320000 | 1.7852180000  | 0.9381510000  |
| B  | 0.7737800000  | -2.4751080000 | -1.0412970000 |
| B  | 1.9584750000  | -1.4478470000 | -1.1592230000 |
| B  | 2.5351650000  | 0.0146390000  | -1.0497370000 |
| B  | 2.1545490000  | 1.5263780000  | -0.9569550000 |
| B  | -0.7817320000 | -2.4329030000 | -1.0770770000 |
| B  | 0.8008780000  | 0.5464910000  | -1.0714550000 |
| B  | 0.0771400000  | -0.9487100000 | -1.1765260000 |
| B  | 0.8493100000  | 2.3803090000  | -1.0552720000 |
| B  | -0.7242190000 | 2.3480070000  | -1.1374320000 |
| B  | -1.9232550000 | -1.3555440000 | -1.2254120000 |
| B  | -2.5512330000 | 0.0821960000  | -1.0712020000 |
| B  | -0.8570610000 | 0.4231860000  | -1.1574070000 |
| B  | -2.0814510000 | 1.5659310000  | -1.0221300000 |

18

energy

|    |               |               |               |
|----|---------------|---------------|---------------|
| Al | -0.5107450000 | -1.7206250000 | 2.2891240000  |
| Al | 1.2958250000  | 0.2463570000  | -1.5844270000 |
| Al | 1.2939590000  | 0.2474920000  | 1.5826250000  |
| Al | -0.5095840000 | -1.7260710000 | -2.2863530000 |
| B  | -1.7446980000 | 0.8409280000  | -0.0012730000 |
| B  | -3.0094370000 | 1.8605420000  | -0.0020680000 |
| B  | 2.0706490000  | -1.3441500000 | 0.0019310000  |
| B  | -3.2878760000 | 0.3363630000  | -0.0016410000 |
| B  | -1.0079540000 | -1.9180230000 | 0.0025760000  |
| B  | 0.5524480000  | -1.7757830000 | 0.0014690000  |
| B  | -0.4397690000 | -0.2375760000 | -0.0020850000 |
| B  | 2.9629710000  | -0.0821630000 | 0.0013670000  |
| B  | -0.1389090000 | 1.3729830000  | 0.0014720000  |
| B  | -0.0916370000 | 3.0895840000  | -0.0016660000 |
| B  | 1.2859110000  | 2.3765490000  | -0.0006600000 |
| B  | 2.5611190000  | 1.4035960000  | 0.0001950000  |
| B  | -1.5918670000 | 2.6138010000  | -0.0016350000 |
| B  | -2.2015340000 | -0.8592510000 | -0.0005030000 |

19

energy

|    |               |               |               |
|----|---------------|---------------|---------------|
| Al | -1.4366550000 | 1.0391420000  | 0.8566390000  |
| Al | 0.0016400000  | 1.0031030000  | -1.6917450000 |
| Al | 0.0033970000  | 3.1205120000  | -0.0626780000 |
| Al | 1.4414380000  | 1.0372850000  | 0.8554200000  |
| B  | -0.7636250000 | -1.0275450000 | 2.4212490000  |
| B  | -2.7538600000 | -0.8365080000 | -1.1175530000 |
| B  | -3.0202110000 | -0.8327820000 | 0.4136180000  |
| B  | -2.1563980000 | -0.9817280000 | 1.6831710000  |
| B  | -1.4905310000 | -1.3373140000 | -0.0890150000 |
| B  | -1.4442230000 | -1.0865240000 | -1.9576590000 |
| B  | -0.0021100000 | -1.3337400000 | 0.8083270000  |

|   |               |               |               |
|---|---------------|---------------|---------------|
| B | 2.1520740000  | -0.9864880000 | 1.6839400000  |
| B | 0.7589290000  | -1.0294080000 | 2.4217420000  |
| B | 1.4865270000  | -1.3407010000 | -0.0885850000 |
| B | 3.0172960000  | -0.8405770000 | 0.4150220000  |
| B | 2.7518900000  | -0.8439040000 | -1.1163270000 |
| B | 1.4418070000  | -1.0902240000 | -1.9567760000 |
| B | -0.0010410000 | -1.0672480000 | -2.5748040000 |
| B | -0.0020580000 | -1.4854200000 | -0.8362060000 |

20

energy

|    |               |               |               |
|----|---------------|---------------|---------------|
| Al | -1.4180260000 | 1.2479050000  | -0.6761880000 |
| Al | 0.0001510000  | 0.6620480000  | 1.8411090000  |
| Al | 1.4222850000  | 1.2469680000  | -0.6737590000 |
| Al | 0.0011090000  | 3.0081380000  | 0.6331020000  |
| B  | -0.8569010000 | -1.6790180000 | 0.6347570000  |
| B  | -0.0010490000 | -1.4946720000 | 2.3369500000  |
| B  | 1.5272190000  | -1.1755280000 | 2.0958030000  |
| B  | -1.5286780000 | -1.1732950000 | 2.0966250000  |
| B  | -2.4431690000 | -0.8796360000 | 0.8366380000  |
| B  | 0.8551040000  | -1.6805090000 | 0.6338150000  |
| B  | -2.3199960000 | -0.3289020000 | -1.9948630000 |
| B  | -1.5963790000 | -1.3119420000 | -0.8592260000 |
| B  | -3.0099400000 | -0.4488200000 | -0.5973970000 |
| B  | 2.4422340000  | -0.8828950000 | 0.8363140000  |
| B  | 1.5936620000  | -1.3139700000 | -0.8606040000 |
| B  | 3.0088340000  | -0.4531090000 | -0.5983280000 |
| B  | -0.0015090000 | -1.6573270000 | -0.7841800000 |
| B  | 0.8046770000  | -0.6095110000 | -2.3520040000 |
| B  | -0.8068630000 | -0.6087700000 | -2.3519850000 |
| B  | 2.3184040000  | -0.3312520000 | -1.9954010000 |

6

energy

|    |               |               |               |
|----|---------------|---------------|---------------|
| Al | -1.3258980000 | 1.4508180000  | -0.0572650000 |
| Al | 1.3245320000  | 1.4514000000  | -0.0567200000 |
| Al | 1.9462980000  | -1.1686000000 | -0.1921660000 |
| Al | -1.9451270000 | -1.1701530000 | -0.1918330000 |
| B  | -0.0002540000 | 0.0230930000  | 0.7869840000  |
| B  | 0.0007650000  | -1.4881040000 | 0.5077750000  |

7

energy

|    |               |               |               |
|----|---------------|---------------|---------------|
| Al | 2.0612150000  | -0.0000410000 | -0.5314560000 |
| Al | -0.1465630000 | -1.8075130000 | -0.3175470000 |
| Al | -0.1462970000 | 1.8075140000  | -0.3174680000 |
| Al | -2.1986920000 | 0.0001520000  | -0.2127860000 |
| B  | 0.8464940000  | -0.7906070000 | 1.2138330000  |
| B  | 0.8466650000  | 0.7902790000  | 1.2138490000  |
| B  | -0.5742820000 | 0.0000370000  | 1.1583890000  |

8

energy

|    |               |               |               |
|----|---------------|---------------|---------------|
| Al | -2.0494500000 | -0.0006090000 | -0.7592910000 |
| Al | 0.4565410000  | 1.5428960000  | -0.6115010000 |
| Al | 0.4523890000  | -1.5423390000 | -0.6110480000 |
| Al | 2.3822610000  | -0.0023810000 | 0.2360800000  |
| B  | -0.9674800000 | -1.2598220000 | 0.9231070000  |
| B  | 0.1656320000  | 0.0014910000  | 1.0176480000  |
| B  | -1.4589830000 | 0.0022580000  | 1.6788510000  |
| B  | -0.9676940000 | 1.2623970000  | 0.9193670000  |

9

energy

|    |               |               |               |
|----|---------------|---------------|---------------|
| Al | -0.0069880000 | 1.8650590000  | 0.7685460000  |
| Al | -0.7632940000 | -0.6888110000 | 1.3459940000  |
| Al | -2.6303670000 | -0.8408530000 | -0.4464640000 |
| Al | 3.0825610000  | -0.7272650000 | -0.1330660000 |
| B  | 1.0790680000  | -0.8757390000 | 0.1582880000  |
| B  | 0.0221780000  | 1.1477230000  | -1.4131650000 |
| B  | 1.3217640000  | 0.4617360000  | -0.8347960000 |
| B  | -0.1573680000 | -0.4179160000 | -0.8375140000 |

|        |               |               |               |
|--------|---------------|---------------|---------------|
| B      | -1.4386140000 | 0.7030570000  | -1.0638390000 |
| 10     |               |               |               |
| energy |               |               |               |
| Al     | -2.4617010000 | -1.1290380000 | -0.1278320000 |
| Al     | 0.0868930000  | -1.4730730000 | 0.3583950000  |
| Al     | 2.5719320000  | -0.8437110000 | -0.1834410000 |
| Al     | 0.1289900000  | 1.0498490000  | 1.4819870000  |
| B      | -2.1154680000 | 0.9145080000  | -0.2223600000 |
| B      | 0.4703380000  | 1.7955070000  | -0.7493500000 |
| B      | -1.0844420000 | 2.0344890000  | -0.5311630000 |
| B      | 1.8514060000  | 1.0404810000  | -0.3688350000 |
| B      | -0.7488010000 | 0.3796020000  | -0.9546280000 |
| B      | 0.7790690000  | 0.0649470000  | -1.1493460000 |
| 11     |               |               |               |
| energy |               |               |               |
| Al     | -1.3759950000 | 0.0023690000  | 1.6418280000  |
| Al     | 2.3777770000  | 0.0006710000  | 0.7551940000  |
| Al     | 1.3751730000  | 1.9836670000  | -0.5361310000 |
| Al     | 1.3764690000  | -1.9838120000 | -0.5351840000 |
| B      | -3.0059170000 | -0.0024240000 | -0.5135200000 |
| B      | -1.3026760000 | -0.0018860000 | -0.9292980000 |
| B      | -0.6369110000 | -1.4897890000 | -0.4354290000 |
| B      | -2.2172810000 | -1.3400090000 | -0.4054060000 |
| B      | -2.2194180000 | 1.3364860000  | -0.4093170000 |
| B      | 0.2629180000  | 0.0011810000  | -0.3144420000 |
| B      | -0.6396200000 | 1.4889150000  | -0.4394280000 |
| 12     |               |               |               |
| energy |               |               |               |
| Al     | -0.9013700000 | -2.1910860000 | 0.2492100000  |
| Al     | -2.5909430000 | 0.0023780000  | -0.5052200000 |
| Al     | 0.3437010000  | 0.0005470000  | -1.2308500000 |
| Al     | -0.8974170000 | 2.1908980000  | 0.2503520000  |
| B      | 0.5876110000  | 0.8646860000  | 1.2331370000  |
| B      | 1.5618810000  | -1.6378980000 | 0.1972980000  |
| B      | 0.5871010000  | -0.8677770000 | 1.2319500000  |
| B      | 1.8921820000  | -0.0008190000 | 0.6521880000  |
| B      | -0.7901110000 | -0.0008320000 | 1.0962110000  |
| B      | 2.5597870000  | 0.7911920000  | -0.6968540000 |
| B      | 1.5614820000  | 1.6363610000  | 0.1984800000  |
| B      | 2.5597440000  | -0.7920300000 | -0.6974880000 |
| 13     |               |               |               |
| energy |               |               |               |
| Al     | -0.2353110000 | -0.7853910000 | -1.2917280000 |
| Al     | -2.8296430000 | 0.4166790000  | -0.4291380000 |
| Al     | 2.1467450000  | 1.6404390000  | 0.0395620000  |
| Al     | -0.6050380000 | 2.1657740000  | 0.0040710000  |
| B      | 0.7764100000  | -2.4384390000 | 0.1829210000  |
| B      | -0.7189810000 | -2.4698400000 | 0.6119370000  |
| B      | 0.0077340000  | -1.0435410000 | 1.2120670000  |
| B      | -1.6356590000 | -1.2272390000 | 0.8226150000  |
| B      | -1.0309790000 | 0.3068860000  | 1.0711170000  |
| B      | 1.9647870000  | -1.7335450000 | -0.5961750000 |
| B      | 1.5590370000  | -0.5929420000 | 0.6308140000  |
| B      | 0.5654930000  | 0.5478730000  | 1.1995850000  |
| B      | 2.4726010000  | -0.2867160000 | -0.7740740000 |
| 5      |               |               |               |
| energy |               |               |               |
| Al     | -0.0002290000 | -0.8754350000 | 2.5152180000  |
| Al     | -0.0002290000 | -0.8754350000 | -2.5152180000 |
| Al     | -0.0002290000 | 1.4239130000  | -1.2408210000 |
| Al     | -0.0002290000 | 1.4239130000  | 1.2408210000  |
| Al     | 0.0009150000  | -1.0969560000 | -0.0000000000 |
| 6      |               |               |               |
| energy |               |               |               |
| Al     | -1.4676130000 | -1.5928720000 | -0.0000000000 |
| Al     | 1.0614490000  | -1.8878720000 | 0.0000000000  |
| Al     | 2.1233560000  | 0.4261820000  | 0.0000000000  |

|    |               |              |               |
|----|---------------|--------------|---------------|
| Al | 0.2510410000  | 2.1511140000 | 0.0000000000  |
| Al | -1.9682330000 | 0.9034200000 | -0.0000000000 |
| B  | 0.0000000000  | 0.0000750000 | 0.0000000000  |

15

energy

|    |               |               |               |
|----|---------------|---------------|---------------|
| Al | 0.2294300000  | -1.8192230000 | 0.1471480000  |
| Al | 1.0134150000  | 0.7474980000  | 1.1950260000  |
| Al | 2.8164490000  | -1.4171370000 | 0.1935460000  |
| Al | -1.8460710000 | -0.2514400000 | 1.7498760000  |
| Al | -2.1338350000 | -1.5516000000 | -0.9880220000 |
| B  | 1.9944890000  | 1.8611730000  | -0.5088290000 |
| B  | 1.4262180000  | -0.0160520000 | -1.0896800000 |
| B  | -0.0979270000 | -0.2511850000 | -1.4320290000 |
| B  | -1.3215960000 | 0.6815650000  | -0.8989150000 |
| B  | 0.6998880000  | 2.6872240000  | -0.2107990000 |
| B  | -0.8406840000 | 2.3733780000  | -0.1330340000 |
| B  | 0.2718550000  | 1.2945640000  | -1.0782820000 |
| B  | -2.3132610000 | 1.7106600000  | -0.0243470000 |
| B  | 2.8078570000  | 0.5142900000  | -0.3397770000 |
| B  | -2.8332510000 | 0.3033260000  | -0.2580040000 |

16

energy

|    |               |               |               |
|----|---------------|---------------|---------------|
| Al | -0.9717050000 | -1.4224680000 | 1.4629700000  |
| Al | -2.5961660000 | 0.0584180000  | -0.8196870000 |
| Al | 1.6856150000  | 1.2277040000  | 1.0739970000  |
| Al | -0.9057150000 | 1.3339670000  | 1.4969040000  |
| Al | 1.6130860000  | -1.3535000000 | 0.9947070000  |
| B  | -0.4542070000 | -0.7557090000 | -0.8281210000 |
| B  | -1.7250430000 | -1.8278250000 | -0.5964730000 |
| B  | -0.3289970000 | -2.4423520000 | -0.9943260000 |
| B  | 1.1341490000  | -1.8030300000 | -1.2430820000 |
| B  | 0.9435150000  | 0.0329190000  | -1.1519670000 |
| B  | 2.3624570000  | -0.7676950000 | -1.4197390000 |
| B  | -0.2763290000 | 2.5308960000  | -0.8230080000 |
| B  | -0.4499270000 | 0.8549240000  | -0.8845550000 |
| B  | 1.1602020000  | 1.8543440000  | -1.1359150000 |
| B  | -1.6923860000 | 1.9147070000  | -0.5066260000 |
| B  | 2.3812690000  | 0.8141040000  | -1.3593020000 |

17

energy

|    |               |               |               |
|----|---------------|---------------|---------------|
| Al | -2.8067100000 | -0.5077490000 | -1.2022570000 |
| Al | 0.5860480000  | 0.5376060000  | 1.4411100000  |
| Al | -1.2870010000 | 1.6202070000  | -0.5425300000 |
| Al | 0.2758180000  | -2.4186420000 | 1.3992200000  |
| Al | 2.6576240000  | -0.5568480000 | 0.1651360000  |
| B  | -0.1388740000 | -2.0835450000 | -1.1698180000 |
| B  | -0.2600400000 | -0.5499290000 | -0.4497880000 |
| B  | -1.6587520000 | 0.7093550000  | 1.6367400000  |
| B  | -1.5174880000 | -0.6955700000 | 0.9197260000  |
| B  | -1.3422340000 | -1.8490180000 | -0.1848870000 |
| B  | 1.0384370000  | -1.2015400000 | -1.7418090000 |
| B  | -0.9530600000 | 2.0932100000  | 1.6359960000  |
| B  | 1.2264880000  | 2.2318650000  | -0.3474720000 |
| B  | 2.0146880000  | 0.0247920000  | -1.9899500000 |
| B  | 2.1249580000  | 1.4552230000  | -1.4073240000 |
| B  | 0.7415890000  | 0.6292280000  | -0.9792080000 |
| B  | 0.2172650000  | 2.6820370000  | 0.8000280000  |

18

energy

|    |               |               |               |
|----|---------------|---------------|---------------|
| Al | -2.2877950000 | -0.0019890000 | -0.3143560000 |
| Al | -0.3024540000 | 1.4934710000  | 1.0906890000  |
| Al | -0.2982840000 | -1.4917290000 | 1.0920830000  |
| Al | -2.1599560000 | -0.0008270000 | 2.3150300000  |
| Al | 3.1446720000  | 0.0041900000  | 0.9439740000  |
| B  | 0.1959130000  | -0.0014510000 | -1.7470540000 |
| B  | 0.9653050000  | 2.7907820000  | -0.3022210000 |
| B  | 0.8251120000  | 1.4256550000  | -1.2152640000 |

|   |               |               |               |
|---|---------------|---------------|---------------|
| B | 1.8392440000  | 1.5540980000  | 0.2419360000  |
| B | -0.2786060000 | 2.7050640000  | -1.2269540000 |
| B | -1.4649900000 | -0.0036910000 | -2.2849750000 |
| B | 1.2765330000  | 0.0009740000  | -0.3245470000 |
| B | -0.8921710000 | 1.4512840000  | -1.9927110000 |
| B | 1.8430060000  | -1.5498410000 | 0.2443800000  |
| B | 0.8280550000  | -1.4260150000 | -1.2123040000 |
| B | 0.9721800000  | -2.7896730000 | -0.2979650000 |
| B | -0.2717510000 | -2.7085620000 | -1.2232070000 |
| B | -0.8879040000 | -1.4567270000 | -1.9904050000 |

19

energy

|    |               |               |               |
|----|---------------|---------------|---------------|
| Al | 2.5093490000  | 0.0013320000  | -0.0364550000 |
| Al | -1.5819500000 | -1.4590110000 | 0.3807990000  |
| Al | -2.9253130000 | -0.0013650000 | -1.3880350000 |
| Al | -0.2693650000 | -0.0006220000 | -1.6796210000 |
| Al | -1.5828840000 | 1.4583660000  | 0.3797000000  |
| B  | 1.0117080000  | 1.4996440000  | 0.6344240000  |
| B  | 0.7328200000  | 0.0002010000  | 1.3384410000  |
| B  | 1.0130730000  | -1.4986770000 | 0.6338230000  |
| B  | 1.3029530000  | -1.9917930000 | -1.1403860000 |
| B  | -0.0000250000 | 1.4550270000  | 2.2784410000  |
| B  | 0.5943260000  | 2.9388060000  | -0.1050070000 |
| B  | 0.0195700000  | 2.7215090000  | 1.3227040000  |
| B  | 1.7763510000  | 0.7718870000  | -2.0265480000 |
| B  | 1.3006700000  | 1.9930200000  | -1.1400470000 |
| B  | 0.0013750000  | -1.4557860000 | 2.2784810000  |
| B  | 0.5972060000  | -2.9383010000 | -0.1055880000 |
| B  | -0.1391560000 | -0.0004450000 | 2.8292010000  |
| B  | 0.0222050000  | -2.7216990000 | 1.3221270000  |
| B  | 1.7773490000  | -0.7700130000 | -2.0266730000 |

20

energy

|    |               |               |               |
|----|---------------|---------------|---------------|
| Al | 1.9652460000  | 0.0015510000  | 0.7229900000  |
| Al | -0.5413980000 | -1.4486110000 | 1.2681830000  |
| Al | -0.5466730000 | 1.4428140000  | 1.2706870000  |
| Al | 0.7412040000  | -0.0019510000 | 3.0419770000  |
| Al | -2.6917110000 | -0.0029760000 | -0.4643420000 |
| B  | -0.8509170000 | -1.4968730000 | -1.2624320000 |
| B  | 0.7840460000  | -0.9416250000 | -1.5606210000 |
| B  | 0.7811280000  | 0.9480180000  | -1.5586140000 |
| B  | 1.9274460000  | -2.1026430000 | -1.0441430000 |
| B  | -1.0341750000 | -2.9174360000 | -0.3874890000 |
| B  | 0.4653220000  | -2.6521500000 | -0.7872490000 |
| B  | -2.2241380000 | -1.9356310000 | -0.2857950000 |
| B  | -0.5380530000 | 0.0013390000  | -1.7904640000 |
| B  | 2.6121480000  | 0.7997610000  | -1.3795960000 |
| B  | 2.6143540000  | -0.7893090000 | -1.3812460000 |
| B  | 0.4582120000  | 2.6556160000  | -0.7818520000 |
| B  | 1.9218520000  | 2.1107730000  | -1.0402860000 |
| B  | -0.8551610000 | 1.4977050000  | -1.2597010000 |
| B  | -1.0419340000 | 2.9156610000  | -0.3810420000 |
| B  | -2.2294660000 | 1.9306440000  | -0.2821560000 |

21

energy

|    |               |               |               |
|----|---------------|---------------|---------------|
| Al | 3.0347590000  | 0.1276570000  | 0.1893740000  |
| Al | -1.5215690000 | 1.3847360000  | -0.8600800000 |
| Al | -2.3679410000 | -0.7316370000 | -2.1671020000 |
| Al | 0.1639070000  | -0.8938620000 | -1.4497250000 |
| Al | -2.1459240000 | -1.1353790000 | 0.4030310000  |
| B  | -1.5230710000 | 0.7067130000  | 2.1228070000  |
| B  | 0.0074090000  | -0.1993420000 | 2.1462040000  |
| B  | -1.4829020000 | -0.8760400000 | 2.4029810000  |
| B  | 1.1865360000  | -1.1148070000 | 1.2347560000  |
| B  | 2.1721130000  | 0.1496730000  | -1.8590930000 |
| B  | 1.1257460000  | 1.6050080000  | 0.2750220000  |
| B  | 0.0454230000  | 1.4549430000  | 1.6591930000  |

|   |               |               |               |
|---|---------------|---------------|---------------|
| B | -0.3192120000 | 2.6945660000  | 0.4421750000  |
| B | -1.4644520000 | 2.1089390000  | 1.3887060000  |
| B | 1.5197370000  | 1.5554400000  | -1.4664230000 |
| B | 0.5061820000  | 2.6080930000  | -0.9190970000 |
| B | 1.3587010000  | 0.5006530000  | 1.4760780000  |
| B | 0.5768210000  | -2.6289510000 | 0.8201760000  |
| B | -0.3350680000 | -1.8778820000 | 1.8802970000  |
| B | 1.6871210000  | -2.1545760000 | -0.1556430000 |
| B | 2.3145150000  | -1.2863660000 | -1.3484340000 |

7

energy

|    |               |               |               |
|----|---------------|---------------|---------------|
| Al | -1.8711150000 | -0.0018170000 | -1.2054470000 |
| Al | -1.2897700000 | 0.0099470000  | 1.3656380000  |
| Al | 0.4809590000  | 1.8392720000  | 0.5885740000  |
| Al | 0.4679140000  | -1.8374680000 | 0.6004250000  |
| Al | 2.1073450000  | -0.0073500000 | -0.4436800000 |
| B  | 0.1367710000  | 0.7954190000  | -1.1793850000 |
| B  | 0.1353640000  | -0.8021400000 | -1.1749430000 |

8

energy

|    |               |               |               |
|----|---------------|---------------|---------------|
| Al | -1.3508610000 | -0.5111670000 | 1.2733720000  |
| Al | 1.0268670000  | -1.3910650000 | 0.6482330000  |
| Al | -2.4004140000 | -0.3649320000 | -1.0868560000 |
| Al | -0.1086830000 | 1.8898910000  | 0.7945600000  |
| Al | 2.8217690000  | 0.0174970000  | -0.5456900000 |
| B  | -0.1184750000 | -0.6419310000 | -0.9594610000 |
| B  | -0.7196540000 | 0.8806620000  | -1.0614780000 |
| B  | 0.8675650000  | 0.6966870000  | -0.7964690000 |

9

energy

|    |               |               |               |
|----|---------------|---------------|---------------|
| Al | -0.0004940000 | 0.5494860000  | -1.3562020000 |
| Al | 0.0001520000  | 0.5509210000  | 1.3562530000  |
| Al | -2.3945990000 | -0.9130160000 | -0.0003340000 |
| Al | 0.0003240000  | -1.7684610000 | 0.0011020000  |
| Al | 2.3950880000  | -0.9122990000 | -0.0005670000 |
| B  | -0.7814640000 | 2.2075130000  | -0.0005330000 |
| B  | 0.7806870000  | 2.2076190000  | -0.0007660000 |
| B  | 1.7832650000  | 1.0340280000  | 0.0001400000  |
| B  | -1.7837100000 | 1.0335990000  | 0.0005010000  |

10

energy

|    |               |               |               |
|----|---------------|---------------|---------------|
| Al | -2.4643180000 | -0.8591190000 | -0.0585790000 |
| Al | 0.4612830000  | 1.3304410000  | 0.6570020000  |
| Al | -2.0309040000 | 1.7665560000  | -0.1626590000 |
| Al | 2.8753010000  | 0.8777180000  | -0.2390870000 |
| Al | 0.2238210000  | -1.3067360000 | 1.4062750000  |
| B  | 0.7280900000  | -0.3139530000 | -1.0450030000 |
| B  | -0.8081860000 | 0.1384480000  | -0.9557980000 |
| B  | -0.5511670000 | -1.5100950000 | -0.9653820000 |
| B  | 0.9523800000  | -1.9876640000 | -0.8103180000 |
| B  | 2.1094050000  | -1.0297740000 | -0.3911760000 |

11

energy

|    |               |               |               |
|----|---------------|---------------|---------------|
| Al | -2.5316090000 | -0.0854940000 | 0.4359550000  |
| Al | -0.9280560000 | -1.9836330000 | -0.5235720000 |
| Al | 1.5859740000  | -1.9053710000 | 0.4566580000  |
| Al | -0.1104850000 | 0.5980100000  | 1.3336760000  |
| Al | 2.3154040000  | 0.5459130000  | -0.2479770000 |
| B  | 0.4974140000  | -0.4547340000 | -0.9489920000 |
| B  | -1.0114900000 | 0.1355100000  | -1.2097350000 |
| B  | -1.4143810000 | 1.6029280000  | -0.6435290000 |
| B  | -0.3196990000 | 2.6409730000  | -0.1413250000 |
| B  | 0.2206830000  | 1.2036190000  | -0.9203940000 |
| B  | 1.1662790000  | 2.2311990000  | 0.0816520000  |

12

energy

|    |               |              |              |
|----|---------------|--------------|--------------|
| Al | -1.3654550000 | 1.8672050000 | 0.0395250000 |
|----|---------------|--------------|--------------|

|    |               |               |               |
|----|---------------|---------------|---------------|
| Al | 1.3665180000  | 1.8675580000  | 0.0414190000  |
| Al | 2.9329750000  | -0.4304300000 | -0.7561650000 |
| Al | -2.9335660000 | -0.4294320000 | -0.7559510000 |
| Al | 0.0014940000  | -0.5594840000 | -1.0739770000 |
| B  | -0.0010400000 | -0.9321960000 | 1.3440650000  |
| B  | -0.0001530000 | 0.7363350000  | 1.3184760000  |
| B  | 1.4079540000  | -0.0631740000 | 1.0584860000  |
| B  | 1.3815870000  | -1.6427570000 | 0.6192390000  |
| B  | -0.0011010000 | -2.4151010000 | 0.4969500000  |
| B  | -1.3833800000 | -1.6411610000 | 0.6175340000  |
| B  | -1.4089810000 | -0.0620300000 | 1.0586360000  |

13

energy

|    |               |               |               |
|----|---------------|---------------|---------------|
| Al | 0.2662630000  | 0.6132250000  | -1.2359240000 |
| Al | -1.4047230000 | -1.7894940000 | 0.1433450000  |
| Al | 1.2486590000  | -2.0347080000 | 0.0556570000  |
| Al | 3.1907420000  | -0.0555060000 | -0.5880940000 |
| Al | -3.3844880000 | -0.0804440000 | -0.3837160000 |
| B  | -2.0748290000 | 1.4832330000  | -0.2699100000 |
| B  | -1.2767470000 | 0.5207170000  | 0.8322750000  |
| B  | -0.7651380000 | 2.2807600000  | 0.1329830000  |
| B  | 0.3125620000  | 1.0945320000  | 1.2030890000  |
| B  | 0.7723040000  | 2.4966700000  | 0.3587920000  |
| B  | -0.1059100000 | -0.5099630000 | 1.2610650000  |
| B  | 1.4714440000  | -0.1082010000 | 1.0310580000  |
| B  | 1.8835370000  | 1.4442610000  | 0.6733530000  |

14

energy

|    |               |               |               |
|----|---------------|---------------|---------------|
| Al | 0.9606550000  | 0.6629430000  | -1.2668740000 |
| Al | -1.6796530000 | -1.4163050000 | -0.1358130000 |
| Al | 0.9741710000  | -2.1029160000 | -0.0925560000 |
| Al | 3.4206680000  | -0.6691500000 | -0.2082700000 |
| Al | -3.9981700000 | -0.2663670000 | 0.2128380000  |
| B  | 0.0210890000  | 2.4955290000  | -0.0464320000 |
| B  | -2.3853720000 | 0.8488700000  | -0.6142580000 |
| B  | -1.0514480000 | 0.7781380000  | 0.5042490000  |
| B  | -1.3109860000 | 1.9806110000  | -0.7274390000 |
| B  | 1.4801250000  | -0.3461830000 | 1.0917940000  |
| B  | 0.5330060000  | 1.0799730000  | 1.1282780000  |
| B  | 1.4700100000  | 2.3684440000  | 0.5095480000  |
| B  | -0.1507820000 | -0.4411550000 | 1.0555450000  |
| B  | 2.2324140000  | 1.0944420000  | 0.9744690000  |

6

energy

|    |               |               |               |
|----|---------------|---------------|---------------|
| Al | -0.4527960000 | 1.6685750000  | -0.9639210000 |
| Al | -1.2181540000 | -1.2270810000 | -0.9641530000 |
| Al | 0.4520390000  | -1.6671530000 | 0.9644930000  |
| Al | -1.6712740000 | 0.4418790000  | 0.9628200000  |
| Al | 1.6727860000  | -0.4420520000 | -0.9634100000 |
| Al | 1.2174000000  | 1.2258330000  | 0.9641700000  |

7

energy

|    |               |               |               |
|----|---------------|---------------|---------------|
| Al | 0.1302330000  | -1.8757180000 | -0.3751520000 |
| Al | -1.2192420000 | 0.4908520000  | 1.5085650000  |
| Al | -2.0235470000 | -0.4165290000 | -0.8740980000 |
| Al | 1.2204940000  | -0.4961120000 | 1.5061190000  |
| Al | -0.1304280000 | 1.8765010000  | -0.3692330000 |
| Al | 2.0226680000  | 0.4203010000  | -0.8737090000 |
| B  | -0.0004610000 | 0.0018310000  | -1.3584830000 |

16

energy

|    |               |               |               |
|----|---------------|---------------|---------------|
| Al | 1.8232460000  | 0.2454270000  | -1.1386110000 |
| Al | 0.6833010000  | 2.6127220000  | -0.8673860000 |
| Al | -1.5775920000 | 1.2269730000  | -0.9045590000 |
| Al | -0.6952010000 | -1.3486900000 | -1.0072630000 |
| Al | -3.2407690000 | -1.2022500000 | -0.0554730000 |
| Al | 1.5424030000  | -2.4419560000 | -0.2961260000 |

|   |               |               |              |
|---|---------------|---------------|--------------|
| B | 2.9252830000  | -1.0800260000 | 0.3905930000 |
| B | 1.4888180000  | -0.7242100000 | 1.2170880000 |
| B | 0.1555500000  | 0.3255230000  | 1.4575140000 |
| B | 1.5725340000  | 1.3119210000  | 1.1508320000 |
| B | 2.8286490000  | 0.3484800000  | 0.9609070000 |
| B | -0.0074010000 | -1.3003540000 | 1.1776460000 |
| B | -2.5907720000 | 0.5638950000  | 0.8697690000 |
| B | 0.1330500000  | 1.9944180000  | 1.2868770000 |
| B | -1.3389070000 | 1.3806910000  | 1.3954260000 |
| B | -1.3588120000 | -0.4601240000 | 1.1938350000 |

17

energy

|    |               |               |               |
|----|---------------|---------------|---------------|
| Al | 0.6458170000  | 1.5338270000  | -2.1981880000 |
| Al | -1.4803810000 | -0.0542520000 | -1.4980410000 |
| Al | 2.0300480000  | -0.7806980000 | 1.3032490000  |
| Al | -1.4691560000 | -0.1622870000 | 1.4924860000  |
| Al | 2.0192080000  | -0.6838160000 | -1.3670770000 |
| Al | 0.6573220000  | 1.3709400000  | 2.3017180000  |
| B  | 0.7502820000  | 2.0891710000  | 0.0743940000  |
| B  | 1.8812460000  | 0.9812020000  | 0.0331810000  |
| B  | -2.3442810000 | 1.4387010000  | 0.0581820000  |
| B  | -0.8267130000 | 1.8902190000  | 0.0696720000  |
| B  | 0.2538120000  | 0.3848430000  | 0.0126660000  |
| B  | -0.0068670000 | -2.9370060000 | -0.1040890000 |
| B  | 0.0020140000  | -1.2414360000 | -0.0438630000 |
| B  | -2.7406220000 | -1.3583090000 | -0.0414090000 |
| B  | -1.4551380000 | -2.2683030000 | -0.0770790000 |
| B  | 1.4061780000  | -2.2951650000 | -0.0844260000 |
| B  | -3.1673460000 | 0.1344280000  | 0.0139850000  |

18

energy

|    |               |               |               |
|----|---------------|---------------|---------------|
| Al | 1.9176900000  | 1.2673750000  | -0.1770490000 |
| Al | 3.1475060000  | -1.2399300000 | -0.0402170000 |
| Al | -1.8423300000 | -0.4271410000 | 1.4169400000  |
| Al | -0.9735400000 | 1.0380020000  | -0.8589890000 |
| Al | -1.0972480000 | -1.7134020000 | -1.1469190000 |
| Al | -3.4308900000 | -0.2800300000 | -0.8240630000 |
| B  | 0.6419340000  | 2.2919850000  | -1.6716010000 |
| B  | -0.3291960000 | 1.4340500000  | 2.5154690000  |
| B  | -0.0517030000 | 2.2879560000  | 1.1967420000  |
| B  | 0.2683450000  | 2.8303090000  | -0.2582670000 |
| B  | 0.9316110000  | 0.8575910000  | -2.1987780000 |
| B  | 1.0903020000  | -0.6149350000 | -1.6288990000 |
| B  | 0.4153790000  | 0.5553370000  | 1.3054640000  |
| B  | 0.6512630000  | -0.6031210000 | 0.1789500000  |
| B  | -0.0767960000 | -0.0618700000 | 2.8402970000  |
| B  | 0.4275540000  | -1.2982000000 | 1.9836280000  |
| B  | 1.1127620000  | -1.9608690000 | -0.7786500000 |
| B  | 0.8434560000  | -2.1949070000 | 0.7544180000  |

19

energy

|    |               |               |               |
|----|---------------|---------------|---------------|
| Al | 0.7816890000  | 0.9942860000  | 1.5295450000  |
| Al | 1.3361980000  | -1.3255890000 | 2.5631040000  |
| Al | -1.7030080000 | 1.7901480000  | 0.3039180000  |
| Al | -0.4924630000 | -1.5417990000 | 0.6894350000  |
| Al | 2.3217490000  | -0.9316270000 | 0.1788200000  |
| Al | -3.3278070000 | -0.1849760000 | 0.6607860000  |
| B  | 0.3493350000  | 1.9866610000  | -0.9240070000 |
| B  | 1.5239700000  | 2.6087710000  | 0.0610450000  |
| B  | 0.0491560000  | 2.8192200000  | 0.5340250000  |
| B  | -1.7453860000 | -0.1373320000 | -1.0468240000 |
| B  | -0.2982740000 | -0.5683630000 | -1.9590800000 |
| B  | 0.9056800000  | 0.6302760000  | -1.8177190000 |
| B  | 1.4407560000  | -1.0586730000 | -2.1034560000 |
| B  | 2.4894830000  | 0.1144750000  | -1.6948280000 |
| B  | -1.1988480000 | -2.0496200000 | -1.4494840000 |
| B  | 0.2842150000  | -2.1287270000 | -1.9777940000 |

|   |               |               |               |
|---|---------------|---------------|---------------|
| B | -2.3753060000 | -1.5569350000 | -0.4912880000 |
| B | -0.7216440000 | 0.9653100000  | -1.6090330000 |
| B | 2.1143340000  | 1.4937850000  | -0.9281410000 |

20

energy

|    |               |               |               |
|----|---------------|---------------|---------------|
| Al | -0.8416130000 | -1.1497010000 | 1.1590420000  |
| Al | -1.8875830000 | 1.6684140000  | -0.3556610000 |
| Al | 2.0386540000  | -1.0573670000 | 0.5679370000  |
| Al | 0.5827380000  | 1.3712920000  | 1.3646770000  |
| Al | 1.0229800000  | -0.6584070000 | 2.9660270000  |
| Al | -3.5983090000 | -0.1196200000 | 0.0978570000  |
| B  | -1.5583190000 | -0.5021490000 | -1.1466430000 |
| B  | -2.4319790000 | -1.6838660000 | -0.3990630000 |
| B  | 0.1355840000  | -1.0685840000 | -1.5652510000 |
| B  | 1.2957240000  | 0.3895910000  | -1.5274570000 |
| B  | 2.9702220000  | 0.6001290000  | -1.2271570000 |
| B  | 1.6965700000  | -2.0747780000 | -1.6137020000 |
| B  | 0.3617360000  | -2.7148180000 | -1.2638050000 |
| B  | -1.1313840000 | -2.3696570000 | -0.9045020000 |
| B  | -0.3676830000 | 0.4796820000  | -1.6411520000 |
| B  | 0.3951420000  | 1.8162290000  | -1.1227870000 |
| B  | 2.6838690000  | -0.8346170000 | -1.6392390000 |
| B  | -0.3804830000 | 2.9756850000  | -0.0986210000 |
| B  | 1.1614990000  | 2.9800350000  | -0.1912560000 |
| B  | 2.1456420000  | 1.8651300000  | -0.7390510000 |

21

energy

|    |               |               |               |
|----|---------------|---------------|---------------|
| Al | 2.7353410000  | -1.4391770000 | 0.2741850000  |
| Al | 1.0281970000  | 1.4604980000  | -0.7796140000 |
| Al | -1.0633140000 | -0.1466350000 | -1.7691500000 |
| Al | -1.1733640000 | 2.4737720000  | -1.7611480000 |
| Al | -1.6018670000 | 1.4715290000  | 0.5844900000  |
| Al | -3.0694000000 | -1.4079030000 | 0.2322900000  |
| B  | 2.3871040000  | -0.3452970000 | -1.6507410000 |
| B  | 3.0365270000  | 0.5769080000  | -0.6105010000 |
| B  | 0.4020040000  | -1.8391110000 | -0.3083260000 |
| B  | -1.2514390000 | -2.1630630000 | -0.6701550000 |
| B  | 1.2106240000  | -1.3947340000 | -1.8949250000 |
| B  | -0.1492520000 | -2.1636440000 | -1.8284520000 |
| B  | 0.2625890000  | 1.2465070000  | 2.4781110000  |
| B  | -1.2399060000 | 0.7158820000  | 2.6084060000  |
| B  | -1.8908260000 | -0.4864020000 | 1.7937320000  |
| B  | -0.8846910000 | -1.5884670000 | 0.9022830000  |
| B  | -0.2018110000 | -0.4468070000 | 2.0610750000  |
| B  | 1.3938330000  | 0.0833280000  | 1.6002900000  |
| B  | 2.6434260000  | 1.1849850000  | 0.8168050000  |
| B  | 0.8088370000  | -1.3791010000 | 1.1966540000  |
| B  | 1.6484380000  | 1.7275980000  | 1.8750060000  |

22

energy

|    |               |               |               |
|----|---------------|---------------|---------------|
| Al | 1.2058700000  | 2.0992390000  | 0.0735360000  |
| Al | 0.3025000000  | -1.7169750000 | 1.1972800000  |
| Al | -1.1107710000 | 0.9777370000  | 1.3081420000  |
| Al | -0.6735900000 | 0.8064790000  | -1.6257410000 |
| Al | -1.2297540000 | 2.9999390000  | -0.3557700000 |
| Al | -3.3169390000 | -0.3680110000 | -0.1136550000 |
| B  | 2.0457230000  | -0.9288660000 | -1.0417010000 |
| B  | 2.6199230000  | -0.5342470000 | 0.6774390000  |
| B  | -0.8214370000 | -0.7360310000 | 2.6242850000  |
| B  | -1.8187450000 | -1.2068980000 | 1.4603640000  |
| B  | 1.8730460000  | 0.5277970000  | 2.0232580000  |
| B  | 0.5336120000  | 0.0046740000  | 2.6751390000  |
| B  | 2.8495270000  | 0.6588980000  | -0.6141910000 |
| B  | 2.8726400000  | 1.0512630000  | 0.9449570000  |
| B  | 2.1565390000  | 0.4405970000  | -2.0170330000 |
| B  | 2.1796350000  | -2.0137320000 | 0.2622890000  |
| B  | -1.6189400000 | -1.8773060000 | 0.0110200000  |

|   |               |               |               |
|---|---------------|---------------|---------------|
| B | -1.6791270000 | -1.2990310000 | -1.5256180000 |
| B | -0.4710700000 | -2.3602810000 | -1.0816340000 |
| B | -0.3611720000 | -1.2147340000 | -2.3960150000 |
| B | 1.0679670000  | -0.5099220000 | -2.5276700000 |
| B | 1.1108540000  | -2.4780400000 | -0.7327520000 |

8

energy

|    |               |               |               |
|----|---------------|---------------|---------------|
| Al | -0.2153940000 | -1.7811630000 | -0.3046830000 |
| Al | -2.7308270000 | -0.0725050000 | -0.6100410000 |
| Al | -1.2346800000 | 0.4480090000  | 1.4181430000  |
| Al | 0.2151690000  | 1.7809150000  | -0.3123520000 |
| Al | 1.2341320000  | -0.4413820000 | 1.4202830000  |
| Al | 2.7314940000  | 0.0679560000  | -0.6100350000 |
| B  | -0.7841190000 | 0.0848090000  | -1.3021210000 |
| B  | 0.7843960000  | -0.0895640000 | -1.3012970000 |

9

energy

|    |               |               |               |
|----|---------------|---------------|---------------|
| Al | -3.3401590000 | -0.2051590000 | 0.0000890000  |
| Al | 0.0004200000  | -0.3840400000 | -1.7220770000 |
| Al | -1.3136220000 | 1.3423510000  | 0.0001180000  |
| Al | 1.3143020000  | 1.3416980000  | 0.0019300000  |
| Al | -0.0019380000 | -0.3869550000 | 1.7211380000  |
| Al | 3.3410770000  | -0.2055750000 | 0.0002540000  |
| B  | 0.0001590000  | -1.7241900000 | -0.0016130000 |
| B  | -1.4235660000 | -1.0917290000 | -0.0021110000 |
| B  | 1.4231980000  | -1.0901150000 | -0.0000540000 |

10

energy

|    |               |               |               |
|----|---------------|---------------|---------------|
| Al | 2.1272190000  | 1.6212380000  | -0.4039780000 |
| Al | -0.0016320000 | 1.7421600000  | 1.1332350000  |
| Al | -2.1292310000 | 1.6183690000  | -0.4048910000 |
| Al | 0.0006880000  | -0.9279580000 | 1.1797360000  |
| Al | 2.5718380000  | -1.8538590000 | -0.0040350000 |
| Al | -2.5686070000 | -1.8562550000 | -0.0027180000 |
| B  | 0.0006270000  | -0.9758640000 | -1.1849260000 |
| B  | 1.3941300000  | -0.2809580000 | -0.9040900000 |
| B  | -0.0010510000 | 0.6459190000  | -0.8972140000 |
| B  | -1.3944240000 | -0.2827040000 | -0.9068800000 |

11

energy

|    |               |               |               |
|----|---------------|---------------|---------------|
| Al | 2.9034880000  | -0.0316120000 | -0.1735590000 |
| Al | 1.2865440000  | -2.0709440000 | 0.0165610000  |
| Al | -1.2936550000 | -2.0678870000 | 0.0170750000  |
| Al | -0.0006970000 | 0.2465280000  | -1.2052680000 |
| Al | -2.9030090000 | -0.0231820000 | -0.1733800000 |
| Al | 0.0053900000  | 2.7050600000  | -0.2417070000 |
| B  | 1.5029710000  | 1.2777650000  | 0.6475580000  |
| B  | 0.8660150000  | -0.2368310000 | 1.0074130000  |
| B  | -0.8662990000 | -0.2346760000 | 1.0067940000  |
| B  | 0.0015020000  | 1.1408630000  | 1.2675210000  |
| B  | -1.4991470000 | 1.2821710000  | 0.6474370000  |

12

energy

|    |               |               |               |
|----|---------------|---------------|---------------|
| Al | -2.6170140000 | 0.6226790000  | -0.8826240000 |
| Al | 1.8409370000  | 1.7079600000  | 0.0706650000  |
| Al | -0.8278670000 | 2.1773340000  | 0.2536260000  |
| Al | -2.0711510000 | -1.6733930000 | 0.2019210000  |
| Al | 3.0261060000  | -0.7447290000 | -0.6769890000 |
| Al | 0.1464090000  | -0.3829370000 | -1.0924320000 |
| B  | -1.3158360000 | 0.1976620000  | 1.0111490000  |
| B  | 0.1720220000  | 0.6908170000  | 1.3982530000  |
| B  | -0.1048120000 | -0.9534930000 | 1.2330080000  |
| B  | 1.4476600000  | -0.2354670000 | 1.0716250000  |
| B  | 1.2610150000  | -1.7745420000 | 0.5828180000  |
| B  | -0.1533400000 | -2.3629530000 | 0.2303150000  |

13

energy

|    |               |               |               |
|----|---------------|---------------|---------------|
| Al | 2.0269660000  | 1.4739460000  | -0.2993450000 |
| Al | -0.0000230000 | -1.0450890000 | -1.1476970000 |
| Al | 3.0681220000  | -1.1091260000 | -0.4971830000 |
| Al | -3.0679350000 | -1.1093700000 | -0.4969600000 |
| Al | -0.0002990000 | 2.9353810000  | 0.3155690000  |
| Al | -2.0271350000 | 1.4734880000  | -0.2996870000 |
| B  | 1.3853680000  | -1.8457420000 | 0.7878570000  |
| B  | 0.0001930000  | -2.5675680000 | 0.8988090000  |
| B  | 0.0000940000  | -0.9105020000 | 1.3111550000  |
| B  | -1.4269890000 | -0.1806530000 | 0.8351880000  |
| B  | 1.4271070000  | -0.1806140000 | 0.8348740000  |
| B  | 0.0000690000  | 0.7209180000  | 0.8500540000  |
| B  | -1.3850490000 | -1.8458380000 | 0.7878520000  |

14

energy

|    |               |               |               |
|----|---------------|---------------|---------------|
| Al | 1.2487730000  | 0.7858990000  | -0.7085810000 |
| Al | -0.4693500000 | -2.1629920000 | -0.5745880000 |
| Al | 3.1958570000  | -1.2337200000 | -0.9129240000 |
| Al | -0.4681260000 | 3.0647310000  | -0.6830010000 |
| Al | -2.2374270000 | 0.7060080000  | -0.7483080000 |
| Al | -3.0191640000 | -1.7292940000 | 0.2344900000  |
| B  | -0.8000210000 | 1.3541930000  | 0.7012520000  |
| B  | 0.6485180000  | 2.0438670000  | 1.1720220000  |
| B  | 0.2965250000  | 0.4516120000  | 1.6235230000  |
| B  | 1.4863740000  | -1.6546780000 | 0.2940110000  |
| B  | 1.8557180000  | -0.4040560000 | 1.3024990000  |
| B  | 1.8644280000  | 1.1519290000  | 1.5765500000  |
| B  | 0.2674220000  | -1.1640120000 | 1.2488240000  |
| B  | -1.0704260000 | -0.2984990000 | 0.9028880000  |

15

energy

|    |               |               |               |
|----|---------------|---------------|---------------|
| Al | -3.6838430000 | -0.3160150000 | 0.0172130000  |
| Al | -1.4806150000 | -2.0329370000 | -0.0482810000 |
| Al | 1.0906910000  | -1.8873630000 | 0.2616730000  |
| Al | 1.7876460000  | 0.3703960000  | 1.6353400000  |
| Al | -1.0495280000 | 0.6217210000  | 1.2404700000  |
| Al | 3.2286310000  | -0.9051080000 | -0.8914470000 |
| B  | 1.1011560000  | 0.7436170000  | -0.7285400000 |
| B  | -2.2437460000 | 1.2956350000  | -0.6767280000 |
| B  | -1.6457830000 | -0.1996210000 | -1.0493300000 |
| B  | -0.5463330000 | 1.1120860000  | -1.0834990000 |
| B  | -1.2832280000 | 2.5002000000  | -0.4418260000 |
| B  | 2.7683810000  | 1.0249030000  | -0.2316880000 |
| B  | 0.2772610000  | 2.5373900000  | -0.3561340000 |
| B  | 1.8465020000  | 2.2252010000  | -0.1915140000 |
| B  | 0.0040370000  | -0.4512150000 | -0.9996590000 |

7

energy

|    |               |               |               |
|----|---------------|---------------|---------------|
| Al | 1.1043910000  | 0.9284240000  | 1.5325230000  |
| Al | 1.9164620000  | -1.1296410000 | 0.0002430000  |
| Al | -0.4089150000 | -1.1420850000 | 1.3511340000  |
| Al | -0.7819570000 | 1.7892400000  | -0.0003760000 |
| Al | 1.1035420000  | 0.9274830000  | -1.5337110000 |
| Al | -0.4090650000 | -1.1435210000 | -1.3500070000 |
| Al | -2.5244590000 | -0.2299000000 | 0.0001950000  |

8

energy

|    |               |               |               |
|----|---------------|---------------|---------------|
| Al | 2.0869350000  | 1.5501980000  | -0.0008080000 |
| Al | -0.4853730000 | 1.3181560000  | 1.3883360000  |
| Al | 2.0891660000  | -1.5484110000 | 0.0005980000  |
| Al | -0.4857090000 | 1.3139040000  | -1.3922400000 |
| Al | -0.4857650000 | -1.3197770000 | -1.3874200000 |
| Al | -2.4490410000 | 0.0007080000  | 0.0000310000  |
| Al | -0.4855390000 | -1.3147340000 | 1.3916730000  |
| B  | 0.5598500000  | -0.0001140000 | -0.0004460000 |

17

energy

|    |               |               |               |
|----|---------------|---------------|---------------|
| Al | -1.5948270000 | -0.1132590000 | -1.1119740000 |
| Al | -0.8401590000 | -2.2065650000 | 0.5814480000  |
| Al | -0.5183790000 | -2.3362390000 | -2.0380270000 |
| Al | 1.4291320000  | -1.2480290000 | -0.6009190000 |
| Al | 0.9264040000  | 1.3453480000  | -1.2277950000 |
| Al | 3.4136770000  | 0.9637910000  | -0.1018640000 |
| Al | -1.3659080000 | 2.7069090000  | -0.6889600000 |
| B  | -1.3890650000 | 1.2290930000  | 1.0682900000  |
| B  | -0.1258880000 | 0.3150720000  | 1.7803730000  |
| B  | -1.6574590000 | -0.5396020000 | 2.0047090000  |
| B  | -2.7559360000 | 1.3647630000  | 0.0966890000  |
| B  | -2.7676560000 | 0.2039280000  | 1.1118210000  |
| B  | 0.1378870000  | 1.6791300000  | 0.8882250000  |
| B  | 2.4957700000  | -0.5022350000 | 1.1006050000  |
| B  | -0.2961390000 | -1.2069670000 | 2.4476800000  |
| B  | 1.1976080000  | -0.9617830000 | 1.9139340000  |
| B  | 1.3910360000  | 0.7275180000  | 1.0767110000  |

18

energy

|    |               |               |               |
|----|---------------|---------------|---------------|
| Al | -0.8003480000 | -1.4451860000 | 1.0290790000  |
| Al | 1.8196250000  | -1.6595470000 | -0.0323040000 |
| Al | 1.3934540000  | -1.4684800000 | 2.5300500000  |
| Al | 1.1909730000  | 0.8442100000  | 1.2330070000  |
| Al | -1.6207610000 | 1.2659540000  | 0.9069530000  |
| Al | -0.2548700000 | 3.2667240000  | 0.0513820000  |
| Al | -3.4713860000 | -0.2375630000 | -0.0770430000 |
| B  | -1.2829860000 | -0.5227180000 | -1.2651980000 |
| B  | 0.3898410000  | -0.1783580000 | -1.7541660000 |
| B  | 0.4085080000  | -2.0070060000 | -2.0346220000 |
| B  | -1.0122410000 | -2.3234270000 | -1.4125510000 |
| B  | -0.6970790000 | 0.9382610000  | -1.2220760000 |
| B  | 2.5153030000  | 1.4991530000  | -0.9399920000 |
| B  | 1.6906970000  | -1.1977230000 | -2.2527530000 |
| B  | 2.2713940000  | 0.1504310000  | -1.7282120000 |
| B  | 0.8211090000  | 1.4207870000  | -1.1985570000 |
| B  | -2.2339800000 | -1.7781950000 | -0.6649200000 |
| B  | 1.6620520000  | 2.5269030000  | -0.1938750000 |

19

energy

|    |               |               |               |
|----|---------------|---------------|---------------|
| Al | 1.5166740000  | -1.8775510000 | 0.3787910000  |
| Al | 1.1478340000  | -1.0579020000 | 2.8299850000  |
| Al | -0.3237690000 | 2.5677780000  | 0.0965710000  |
| Al | -3.4487110000 | -0.9666610000 | 0.4076110000  |
| Al | 1.8296880000  | 0.8534210000  | 1.1024880000  |
| Al | -0.7569930000 | -0.1612600000 | 1.2138240000  |
| Al | -2.6984450000 | 1.6049890000  | -0.0707250000 |
| B  | -1.8164760000 | -0.1155770000 | -0.9455410000 |
| B  | 2.7090160000  | 1.6799110000  | -0.8321980000 |
| B  | -1.8099440000 | -1.7712800000 | -0.9370470000 |
| B  | 0.8948310000  | -2.1108980000 | -1.8328560000 |
| B  | 1.6554290000  | 2.6899100000  | -0.3341100000 |
| B  | 2.2757510000  | -1.3189200000 | -1.7488590000 |
| B  | -0.5439390000 | -0.9513260000 | -1.6440050000 |
| B  | 1.0752560000  | 1.3890520000  | -1.2760290000 |
| B  | -0.3846240000 | 0.6823960000  | -1.3647090000 |
| B  | 2.6289170000  | 0.1784800000  | -1.3764870000 |
| B  | 0.9660950000  | -0.2374240000 | -1.7936580000 |
| B  | -0.5426320000 | -2.6176430000 | -1.4067200000 |

20

energy

|    |               |               |               |
|----|---------------|---------------|---------------|
| Al | -2.2760370000 | 0.0135950000  | -0.1777180000 |
| Al | 1.5622780000  | -0.0080110000 | 2.9000230000  |
| Al | 0.0561060000  | -1.4590640000 | 1.2954200000  |
| Al | 0.0856370000  | 1.4720300000  | 1.2965490000  |
| Al | 2.4972090000  | -0.0175700000 | 0.4318760000  |
| Al | -2.6948100000 | -2.4774410000 | 0.0227770000  |
| Al | -2.6600900000 | 2.5105660000  | 0.0187680000  |

|   |               |               |               |
|---|---------------|---------------|---------------|
| B | -0.7881040000 | -1.5387330000 | -1.0746580000 |
| B | -0.7531070000 | -2.9575630000 | -0.2024910000 |
| B | 0.8341890000  | -0.9430780000 | -1.5367420000 |
| B | 0.8476860000  | 0.9250990000  | -1.5406870000 |
| B | 2.6729150000  | 0.7723110000  | -1.7757100000 |
| B | 2.6622510000  | -0.8131600000 | -1.7713580000 |
| B | 2.0397040000  | -2.1214190000 | -1.3312940000 |
| B | 0.6571330000  | -2.6853690000 | -0.8091320000 |
| B | 2.0672600000  | 2.0896110000  | -1.3394820000 |
| B | -0.5357050000 | 0.0006370000  | -1.5587790000 |
| B | -0.7662320000 | 1.5443160000  | -1.0771270000 |
| B | 0.6922530000  | 2.6732310000  | -0.8197660000 |
| B | -0.7130050000 | 2.9654450000  | -0.2107790000 |

21

energy

|    |               |               |               |
|----|---------------|---------------|---------------|
| Al | 1.9713980000  | -0.9836490000 | -1.3368150000 |
| Al | 1.8785710000  | 0.9915110000  | 0.9191500000  |
| Al | -0.0018220000 | 2.8728510000  | 0.2458870000  |
| Al | -1.9685020000 | -0.9849830000 | -1.3378940000 |
| Al | -1.8816510000 | 0.9904320000  | 0.9191330000  |
| Al | -0.0013500000 | -0.2185180000 | 2.8437090000  |
| Al | 0.0019650000  | -2.7978510000 | -0.9080760000 |
| B  | 2.9164740000  | -0.9537150000 | 0.7257840000  |
| B  | 1.4355320000  | -1.4512650000 | 1.0232480000  |
| B  | 3.6205830000  | 0.0632180000  | -0.1796210000 |
| B  | 2.8986790000  | 1.0409030000  | -1.1223030000 |
| B  | -0.0002540000 | 2.0219820000  | -1.8732110000 |
| B  | 1.4306420000  | 1.4776040000  | -1.5690560000 |
| B  | 0.0002680000  | 0.5653650000  | -0.9278750000 |
| B  | -1.4341750000 | -1.4526210000 | 1.0220680000  |
| B  | -2.9155220000 | -0.9567030000 | 0.7236280000  |
| B  | -1.4307090000 | 1.4761680000  | -1.5698400000 |
| B  | -2.8986780000 | 1.0379820000  | -1.1240700000 |
| B  | -3.6203910000 | 0.0592360000  | -0.1823440000 |
| B  | 0.0008320000  | -2.0443300000 | 1.2676990000  |
| B  | 0.0003380000  | -0.5452860000 | 0.2886450000  |

22

energy

|    |               |               |               |
|----|---------------|---------------|---------------|
| Al | 1.1936610000  | 2.3299740000  | -0.3000330000 |
| Al | -3.0422440000 | -0.8792990000 | -0.5221660000 |
| Al | -1.1752220000 | -0.6052780000 | 1.6145630000  |
| Al | 1.7980930000  | -0.0875880000 | 1.0663400000  |
| Al | 0.7721450000  | -0.0731460000 | -1.7411380000 |
| Al | 3.1534140000  | 0.7432480000  | -1.0420170000 |
| Al | 1.8450870000  | -2.6359730000 | -0.1283650000 |
| B  | -1.9105790000 | 1.0834020000  | -0.6740150000 |
| B  | -1.6893820000 | 1.8935010000  | 0.9011070000  |
| B  | 0.5798170000  | -0.8362250000 | 2.7187730000  |
| B  | 0.5181050000  | -2.0215000000 | 1.6540470000  |
| B  | -0.0806980000 | 2.0200110000  | 1.9742870000  |
| B  | 0.3968890000  | 0.6967780000  | 2.6853230000  |
| B  | -1.0342080000 | 2.6777590000  | -0.5979430000 |
| B  | -0.4901460000 | 3.0243050000  | 0.8591410000  |
| B  | -1.0152830000 | 1.8011620000  | -1.9130180000 |
| B  | -2.6040250000 | 0.6041560000  | 0.7760470000  |
| B  | -0.3896300000 | -2.4496520000 | 0.3998610000  |
| B  | 0.0048820000  | -2.1734860000 | -1.2395950000 |
| B  | -1.5648450000 | -2.2711460000 | -0.6958420000 |
| B  | -1.1175440000 | -1.2366550000 | -1.9342240000 |
| B  | -1.4201810000 | 0.3285500000  | -2.1766280000 |

23

energy

|    |               |               |               |
|----|---------------|---------------|---------------|
| Al | 2.1506560000  | 1.6311650000  | -0.0001760000 |
| Al | -1.9112940000 | -0.2438280000 | 1.3931070000  |
| Al | 1.2984400000  | -0.8211480000 | 1.3121340000  |
| Al | 1.4021290000  | -0.5725000000 | -1.5617540000 |
| Al | 3.5226360000  | -0.5950310000 | -0.0746130000 |

|    |               |               |               |
|----|---------------|---------------|---------------|
| Al | 0.6023270000  | -3.2197160000 | -0.2838650000 |
| Al | -3.7896600000 | 0.0067290000  | -0.3760840000 |
| B  | -0.7372300000 | 2.0568320000  | -0.9377640000 |
| B  | -0.7769750000 | 2.2784120000  | 0.7966490000  |
| B  | -0.4314010000 | -1.1927110000 | 2.5782700000  |
| B  | -0.6066440000 | -2.1165430000 | 1.2904830000  |
| B  | 0.2654250000  | 1.7314480000  | 2.2346620000  |
| B  | -0.0757740000 | 0.2868520000  | 2.7972720000  |
| B  | 0.5265810000  | 3.0690010000  | -0.2933200000 |
| B  | 0.7062050000  | 2.8674210000  | 1.2813990000  |
| B  | 0.6968660000  | 2.4076020000  | -1.7275220000 |
| B  | -1.9757120000 | 1.5329350000  | 0.0546160000  |
| B  | -1.2582510000 | -1.9093250000 | -0.1618030000 |
| B  | -0.4853680000 | -1.7827010000 | -1.6338760000 |
| B  | -1.8902830000 | -0.9267760000 | -1.3328340000 |
| B  | -0.6669000000 | -0.3185810000 | -2.3428470000 |
| B  | -0.1310080000 | 1.1991570000  | -2.3359540000 |
| B  | -1.6751420000 | 0.7342320000  | -1.3301790000 |

9

energy

|    |               |               |               |
|----|---------------|---------------|---------------|
| Al | 2.8595380000  | 0.0009060000  | 0.3894710000  |
| Al | 1.0051840000  | 1.5287870000  | -0.9406250000 |
| Al | 1.0039880000  | -1.5337420000 | -0.9337200000 |
| Al | -1.2859580000 | 1.9117640000  | 0.4550880000  |
| Al | -0.7261800000 | 0.0062870000  | 2.2680780000  |
| Al | -1.2848480000 | -1.9087050000 | 0.4668850000  |
| Al | -1.7204860000 | -0.0061110000 | -1.9276930000 |
| B  | 0.8012690000  | 0.0021320000  | 0.8063130000  |
| B  | -0.4144870000 | -0.0000140000 | -0.2277730000 |

10

energy

|    |               |               |               |
|----|---------------|---------------|---------------|
| Al | 0.0350980000  | 0.1968910000  | 1.6152570000  |
| Al | -2.0393840000 | -1.1683480000 | 0.8756420000  |
| Al | -2.9860140000 | 0.7979840000  | -0.6941900000 |
| Al | 2.5470370000  | 1.2188090000  | -0.5111140000 |
| Al | 0.2283410000  | 2.4841510000  | 0.0739320000  |
| Al | 2.3016720000  | -1.1831040000 | 0.3783530000  |
| Al | 0.3916810000  | -2.3596620000 | -0.8777880000 |
| B  | -0.8632850000 | 0.8429280000  | -0.6472970000 |
| B  | -0.9289890000 | -0.7379560000 | -0.9403600000 |
| B  | 0.5483500000  | -0.0704440000 | -0.6485830000 |

11

energy

|    |               |               |               |
|----|---------------|---------------|---------------|
| Al | 0.1454190000  | 0.1158820000  | 1.2834430000  |
| Al | 2.9698010000  | 0.5845100000  | -0.0038040000 |
| Al | 1.9628290000  | -1.7597300000 | -0.0124950000 |
| Al | -0.1401430000 | 2.6509700000  | 0.4723930000  |
| Al | -2.5855250000 | -1.1632690000 | 0.4054840000  |
| Al | -2.2956590000 | 1.2440250000  | -0.5224410000 |
| Al | -0.4871510000 | -2.4540610000 | -0.1767800000 |
| B  | 1.2627730000  | 1.4985400000  | -0.7565350000 |
| B  | -0.2356900000 | 1.0665720000  | -1.1693100000 |
| B  | -0.8103350000 | -0.4240020000 | -0.8744110000 |
| B  | 0.9023720000  | -0.1087620000 | -0.9588230000 |

12

energy

|    |               |               |               |
|----|---------------|---------------|---------------|
| Al | 3.0781450000  | -0.4926680000 | -0.5377940000 |
| Al | -2.0977270000 | -1.4571270000 | 0.2420820000  |
| Al | 1.8259500000  | 2.0106370000  | 0.0086290000  |
| Al | 0.1404420000  | -0.0466730000 | -1.0715840000 |
| Al | -0.8363930000 | 2.3932220000  | 0.1717130000  |
| Al | -2.7555160000 | 0.8374060000  | -0.7157060000 |
| Al | 0.0107060000  | -2.8436660000 | -0.1073440000 |
| B  | 1.4684800000  | 0.0478300000  | 1.0622380000  |
| B  | -0.0376540000 | -0.8046610000 | 1.1808420000  |
| B  | 0.1496720000  | 0.8745050000  | 1.3759710000  |
| B  | 1.3712080000  | -1.4934390000 | 0.5965680000  |

|        |               |               |               |
|--------|---------------|---------------|---------------|
| B      | -1.3022840000 | 0.3328220000  | 1.0103910000  |
| 13     |               |               |               |
| energy |               |               |               |
| Al     | 2.9733490000  | -0.0001200000 | -1.0085360000 |
| Al     | 1.1065000000  | 1.8555650000  | -0.6165290000 |
| Al     | -1.4478450000 | 2.3754860000  | -0.4245890000 |
| Al     | 1.7410740000  | -0.0000760000 | 1.4270060000  |
| Al     | 1.1063110000  | -1.8555860000 | -0.6165570000 |
| Al     | -2.6226560000 | 0.0000910000  | -0.8388620000 |
| Al     | -1.4480530000 | -2.3754130000 | -0.4245750000 |
| B      | -0.2512300000 | 0.0000170000  | 0.0463100000  |
| B      | 0.0150620000  | 1.4424270000  | 1.1714930000  |
| B      | -0.3163480000 | 0.0000040000  | 1.9077470000  |
| B      | 0.0149280000  | -1.4424490000 | 1.1714920000  |
| B      | -1.5625230000 | -0.8334860000 | 1.1048980000  |
| B      | -1.5624550000 | 0.8336240000  | 1.1049290000  |
| 14     |               |               |               |
| energy |               |               |               |
| Al     | 1.2181750000  | -0.1907870000 | 1.6605820000  |
| Al     | -1.1441500000 | 1.9125780000  | 1.4224620000  |
| Al     | 1.2131340000  | -1.3434270000 | -0.9967940000 |
| Al     | -1.1403350000 | -2.1877480000 | 0.9473930000  |
| Al     | 1.2111530000  | 1.5363560000  | -0.6658670000 |
| Al     | -1.1522470000 | 0.2734160000  | -2.3661300000 |
| Al     | 3.4955210000  | 0.0021500000  | -0.0062510000 |
| B      | -0.8301730000 | -0.2197490000 | 1.8946870000  |
| B      | -0.6103910000 | 0.0000490000  | -0.0002020000 |
| B      | -2.1716270000 | 0.8889530000  | -0.3817200000 |
| B      | -2.1674900000 | -0.1134610000 | 0.9679490000  |
| B      | -2.1706200000 | -0.7810510000 | -0.5751430000 |
| B      | -0.8352680000 | -1.5306000000 | -1.1366420000 |
| B      | -0.8376810000 | 1.7492570000  | -0.7569560000 |
| 15     |               |               |               |
| energy |               |               |               |
| Al     | -0.3949100000 | 2.7894160000  | -0.6648290000 |
| Al     | -2.6604790000 | 1.3656710000  | -0.4720970000 |
| Al     | -3.4502460000 | -1.3071730000 | 0.3894510000  |
| Al     | 1.8230230000  | -1.6550190000 | -0.8315990000 |
| Al     | 1.5785970000  | 1.0674850000  | -1.1256760000 |
| Al     | -0.8500000000 | -2.2771070000 | -1.0567420000 |
| Al     | 3.7309360000  | -0.3665380000 | 0.5584780000  |
| B      | -0.2431730000 | -0.0375050000 | 1.2583650000  |
| B      | -0.8707650000 | 1.4894490000  | 1.0622630000  |
| B      | -1.8972690000 | 0.2100350000  | 1.1439400000  |
| B      | -1.2645490000 | -1.3273620000 | 0.8951900000  |
| B      | 0.3526770000  | -1.5113030000 | 0.8105140000  |
| B      | 1.4295650000  | -0.3181510000 | 1.0750120000  |
| B      | 0.7550480000  | 1.4132180000  | 1.1278310000  |
| B      | 2.3184710000  | 1.0781100000  | 0.9547190000  |
| 16     |               |               |               |
| energy |               |               |               |
| Al     | -3.5487430000 | -1.3249650000 | 0.3463810000  |
| Al     | -1.2754250000 | -1.7596040000 | -0.9118340000 |
| Al     | 1.2752220000  | -1.7573670000 | -0.9128910000 |
| Al     | 1.7824480000  | 0.9405680000  | -1.0550360000 |
| Al     | -1.7837920000 | 0.9371810000  | -1.0561200000 |
| Al     | -0.0026640000 | 2.9209620000  | -0.7574060000 |
| Al     | 3.5501910000  | -1.3248730000 | 0.3441790000  |
| B      | 1.4434720000  | -0.5605040000 | 1.1428990000  |
| B      | -2.7214040000 | 0.4651980000  | 0.8911880000  |
| B      | -1.4418180000 | -0.5614440000 | 1.1424000000  |
| B      | 0.0005590000  | 0.3299990000  | 1.3946430000  |
| B      | -1.4451510000 | 1.3413860000  | 1.2863260000  |
| B      | 2.7229240000  | 0.4654250000  | 0.8900900000  |
| B      | 0.0008900000  | 2.0017430000  | 1.3724240000  |
| B      | 1.4467400000  | 1.3406840000  | 1.2877740000  |
| B      | 0.0009720000  | -1.2654340000 | 0.9993450000  |

8

energy

|    |               |               |               |
|----|---------------|---------------|---------------|
| Al | 3.2268790000  | -0.0004050000 | -0.1195960000 |
| Al | -1.2313560000 | -1.6685670000 | 0.5188440000  |
| Al | -1.2299940000 | 1.6679350000  | 0.5211020000  |
| Al | 0.2507380000  | -0.0019700000 | 1.9203420000  |
| Al | 1.1743270000  | 1.5548860000  | -0.3501420000 |
| Al | -2.9242720000 | 0.0009710000  | -0.4302390000 |
| Al | -0.4395720000 | 0.0015320000  | -1.7079110000 |
| Al | 1.1732510000  | -1.5543820000 | -0.3523990000 |

9

energy

|    |               |               |               |
|----|---------------|---------------|---------------|
| Al | -1.5792530000 | -0.0867020000 | -1.8785190000 |
| Al | 1.0002770000  | -0.7414720000 | 1.4704740000  |
| Al | 1.0001920000  | -0.7692380000 | -1.4562390000 |
| Al | -1.1837550000 | -2.0062350000 | 0.0205720000  |
| Al | 3.1533070000  | 0.0886790000  | -0.0013290000 |
| Al | -1.7131180000 | 1.8023710000  | -0.0184330000 |
| Al | 1.0098930000  | 1.7252820000  | -0.0167380000 |
| Al | -1.5778020000 | -0.0474430000 | 1.8806360000  |
| B  | -0.2853240000 | 0.0903720000  | -0.0011050000 |

18

energy

|    |               |               |               |
|----|---------------|---------------|---------------|
| Al | -0.9563610000 | -1.3313320000 | -1.6347230000 |
| Al | -0.9200410000 | -1.4693850000 | 1.2760100000  |
| Al | -1.8148290000 | 0.8159860000  | -0.1647920000 |
| Al | -3.3221490000 | -1.6597610000 | -0.2021160000 |
| Al | 2.7564840000  | 0.6590580000  | -0.8319560000 |
| Al | 0.7865640000  | 2.2562730000  | -0.1276690000 |
| Al | 1.8170430000  | -2.2202040000 | -0.7733850000 |
| Al | 2.0223230000  | -1.0815530000 | 1.4698800000  |
| B  | -0.1941580000 | 0.8466390000  | 2.8685880000  |
| B  | 0.5533770000  | -0.4899140000 | 2.7335040000  |
| B  | -1.2385830000 | 2.8594050000  | 0.6842020000  |
| B  | -0.6829980000 | 1.9335190000  | 1.8234770000  |
| B  | -1.2455060000 | 2.9043200000  | -0.8643140000 |
| B  | 0.3594690000  | 0.7364890000  | -2.0536370000 |
| B  | -0.6160830000 | 1.9661200000  | -1.9019950000 |
| B  | 0.3555250000  | 0.5303710000  | 1.2598260000  |
| B  | 1.1684450000  | -0.5644220000 | -1.8014520000 |
| B  | 0.5810270000  | -0.2421450000 | -0.1774440000 |

19

energy

|    |               |               |               |
|----|---------------|---------------|---------------|
| Al | 0.8955510000  | 0.1572550000  | 1.3101940000  |
| Al | 0.2869750000  | -2.5141570000 | 0.3098470000  |
| Al | -0.2528280000 | -1.7708480000 | 2.7442670000  |
| Al | -1.8561740000 | -0.7156870000 | 0.9193690000  |
| Al | -0.4717130000 | 2.3095690000  | 0.3415140000  |
| Al | 2.0319290000  | 2.5823660000  | -0.1100740000 |
| Al | -3.0188580000 | 2.1570540000  | 0.1843280000  |
| Al | 3.5618740000  | 0.4446910000  | 0.2202650000  |
| B  | 2.3718510000  | -0.8856490000 | -1.0357350000 |
| B  | 0.8729780000  | -0.6124610000 | -1.7241890000 |
| B  | -0.8135230000 | -0.5826170000 | -1.7904180000 |
| B  | 1.5481780000  | -2.1581880000 | -1.5886910000 |
| B  | 0.0103890000  | -2.2159500000 | -1.9990040000 |
| B  | 0.0327220000  | 0.7859530000  | -1.3514570000 |
| B  | -2.5286800000 | -0.9349850000 | -1.3933010000 |
| B  | -3.1102760000 | 0.3273990000  | -0.6294040000 |
| B  | -1.5638230000 | 0.8275840000  | -1.0721540000 |
| B  | 1.6789080000  | 0.6473730000  | -0.9685330000 |
| B  | -1.5582900000 | -2.0890910000 | -1.8383640000 |

20

energy

|    |               |               |               |
|----|---------------|---------------|---------------|
| Al | -0.4283280000 | -2.2193420000 | -1.3332350000 |
| Al | -3.6532580000 | 1.1385760000  | -0.7723730000 |
| Al | 2.0390240000  | 1.8305470000  | -0.4435330000 |

|    |               |               |               |
|----|---------------|---------------|---------------|
| Al | -0.1213620000 | 3.1108530000  | 0.0826730000  |
| Al | 1.8968240000  | -0.8274230000 | -1.4041110000 |
| Al | -0.6626970000 | 0.5891710000  | -0.9349560000 |
| Al | 4.1253690000  | 0.1215540000  | -0.0199790000 |
| Al | -2.8000750000 | -1.2517810000 | 0.2092160000  |
| B  | -1.5882910000 | -2.8634290000 | 0.5519920000  |
| B  | -0.9120940000 | 1.5362180000  | 1.4072910000  |
| B  | -2.1906840000 | 0.6321800000  | 0.9155980000  |
| B  | -0.1045800000 | -3.2665200000 | 0.6952790000  |
| B  | 1.1892570000  | -2.3289220000 | 0.8189980000  |
| B  | -0.8085860000 | -0.1464050000 | 1.4921500000  |
| B  | 2.0982020000  | 0.3819670000  | 1.1826540000  |
| B  | 0.6148000000  | 1.0597670000  | 1.4034770000  |
| B  | -0.4998550000 | -1.7635290000 | 1.3154720000  |
| B  | 2.3499550000  | -1.1848230000 | 0.8191190000  |
| B  | 0.7916870000  | -0.6603120000 | 1.1679310000  |
| B  | -1.9681050000 | 2.1242040000  | 0.2324150000  |

21

energy

|    |               |               |               |
|----|---------------|---------------|---------------|
| Al | -0.4889050000 | 3.1027190000  | -0.4149900000 |
| Al | -2.4157080000 | 1.7083730000  | 0.4140050000  |
| Al | -1.6491720000 | -1.5690580000 | 1.3206570000  |
| Al | 1.9038380000  | 2.3195760000  | 0.1434170000  |
| Al | 2.5889230000  | -0.2675970000 | 1.5336990000  |
| Al | 0.0267330000  | 0.5786970000  | 1.1630760000  |
| Al | 0.8833960000  | -2.3581500000 | 0.9010150000  |
| Al | -4.2294300000 | -0.2052190000 | -0.0085030000 |
| B  | -0.8791120000 | 1.0348870000  | -1.1118370000 |
| B  | 3.5695370000  | 1.1639710000  | -0.1148320000 |
| B  | -1.9577110000 | -0.2439220000 | -0.9582290000 |
| B  | 0.1261030000  | -2.3200200000 | -1.4180700000 |
| B  | -0.3977860000 | -0.5217530000 | -1.4939540000 |
| B  | 2.2871750000  | 0.3645480000  | -0.9840220000 |
| B  | 0.7371900000  | 0.6861770000  | -1.2869120000 |
| B  | -1.4117800000 | -1.9368360000 | -1.1600860000 |
| B  | 2.8254650000  | -1.4996450000 | -0.9185800000 |
| B  | 1.2507830000  | -0.9240940000 | -1.4628860000 |
| B  | 3.7934010000  | -0.3015530000 | -0.4638960000 |
| B  | -2.8292690000 | -1.5735140000 | -0.5102600000 |
| B  | 1.6748470000  | -2.5325330000 | -1.2526110000 |

22

energy

|    |               |               |               |
|----|---------------|---------------|---------------|
| Al | 1.7452110000  | -0.6626560000 | 1.1909950000  |
| Al | 0.7941770000  | -1.0807930000 | -1.8550960000 |
| Al | -1.5194110000 | 1.0966130000  | 1.5320880000  |
| Al | -2.6982060000 | 0.6133410000  | -1.1719310000 |
| Al | -1.7756580000 | -1.8900400000 | -1.7433270000 |
| Al | -0.5551200000 | -1.2680600000 | 2.5435500000  |
| Al | 2.3663760000  | 2.2548860000  | -0.1062690000 |
| Al | 4.1994160000  | 0.3703440000  | 0.6805790000  |
| B  | -1.0625840000 | 2.4654350000  | -0.5788400000 |
| B  | 0.3955530000  | 2.3384970000  | -1.1570590000 |
| B  | 2.5130360000  | 0.2034820000  | -1.0314660000 |
| B  | 1.2006670000  | 1.0470800000  | -1.5661270000 |
| B  | 2.7491940000  | -1.3356590000 | -0.7441180000 |
| B  | 1.6812190000  | -2.3168170000 | -0.2909300000 |
| B  | -0.2659450000 | 0.8222660000  | -0.6534530000 |
| B  | -2.4914280000 | 2.5362310000  | 0.0813980000  |
| B  | -2.3989910000 | -1.0418370000 | 0.7360630000  |
| B  | -3.4757040000 | 0.1108100000  | 0.8927340000  |
| B  | -1.3899360000 | -2.2178460000 | 0.4741590000  |
| B  | 0.1765430000  | -2.1779340000 | 0.2512800000  |
| B  | -0.6991790000 | -0.5768810000 | 0.1178380000  |
| B  | -3.5800890000 | 1.6157270000  | 0.6849920000  |

23

energy

|    |               |               |               |
|----|---------------|---------------|---------------|
| Al | -0.6828390000 | -2.4897940000 | -0.6953660000 |
|----|---------------|---------------|---------------|

|    |               |               |               |
|----|---------------|---------------|---------------|
| Al | 2.0250290000  | 2.2568070000  | -1.3770250000 |
| Al | 0.9932160000  | 0.9627970000  | 1.1943430000  |
| Al | -1.5641630000 | -0.7839140000 | 1.3949700000  |
| Al | -1.5532480000 | 0.0698460000  | -1.4809110000 |
| Al | -3.1827440000 | -1.7217720000 | -0.4745040000 |
| Al | -2.9408870000 | 1.6936140000  | 1.0068160000  |
| Al | 3.7580500000  | -0.5863150000 | 1.4338740000  |
| B  | 1.5743210000  | -0.0506530000 | -1.4951410000 |
| B  | 1.9844720000  | -1.1396670000 | -0.2157840000 |
| B  | -0.1103740000 | 0.0673070000  | 2.7654690000  |
| B  | -0.9340980000 | 1.2970900000  | 2.1836610000  |
| B  | 1.1849940000  | -2.1419180000 | 1.1032520000  |
| B  | 1.3235800000  | -1.8678860000 | -1.6965290000 |
| B  | 1.4342020000  | -2.6992160000 | -0.3356600000 |
| B  | 0.6229160000  | -0.8295720000 | -2.6633780000 |
| B  | 2.4444400000  | 0.4085740000  | -0.1720520000 |
| B  | -0.7200320000 | 2.2934610000  | 0.9336880000  |
| B  | -1.4117510000 | 2.1823060000  | -0.5824550000 |
| B  | 0.1920750000  | 2.6593200000  | -0.3533200000 |
| B  | -0.3395320000 | 1.8980280000  | -1.7544600000 |
| B  | 0.3675540000  | 0.6924040000  | -2.5479240000 |
| B  | 0.5709560000  | -1.2128770000 | 2.2249260000  |

24

energy

|    |               |               |               |
|----|---------------|---------------|---------------|
| Al | -0.1412200000 | 2.7778760000  | 0.6484230000  |
| Al | -2.5661260000 | -2.2694900000 | -0.5485500000 |
| Al | -2.5047410000 | 1.4480940000  | 1.3330630000  |
| Al | 2.4217650000  | 1.6283100000  | 0.4461240000  |
| Al | -0.0450750000 | -2.5646200000 | -0.2908390000 |
| Al | -0.0488130000 | -0.0216650000 | 0.8726150000  |
| Al | 2.2197420000  | -0.1277660000 | 2.5936620000  |
| Al | 1.9958300000  | -2.0064880000 | -1.7499200000 |
| B  | 1.0437180000  | 0.2443670000  | -1.8324750000 |
| B  | -0.4120980000 | 1.0232170000  | -1.4092710000 |
| B  | -1.8511850000 | 0.0961020000  | -1.3153310000 |
| B  | -3.1397340000 | -0.2639840000 | -0.0994940000 |
| B  | -1.9108560000 | 1.9706110000  | -1.3699370000 |
| B  | -3.1177660000 | 1.1092520000  | -0.8469830000 |
| B  | 0.8971970000  | 2.1098100000  | -1.8838910000 |
| B  | -0.5269490000 | 2.7260150000  | -1.5572960000 |
| B  | 2.2997330000  | 1.3948290000  | -1.7944930000 |
| B  | -0.3419200000 | -0.6339020000 | -1.4430990000 |
| B  | 2.6981830000  | -0.0143870000 | -1.2362250000 |
| B  | 1.6326700000  | -1.7225810000 | 1.0253120000  |
| B  | 2.5171060000  | -0.6230660000 | 0.2970250000  |
| B  | -1.2120230000 | -1.7245930000 | 1.7343190000  |
| B  | 0.3196510000  | -2.0046030000 | 1.8250840000  |
| B  | -2.3572670000 | -0.7341430000 | 1.3148510000  |

10

energy

|    |               |               |               |
|----|---------------|---------------|---------------|
| Al | 0.0016260000  | -2.5971630000 | 0.0002720000  |
| Al | -2.2966620000 | -1.1306250000 | 0.0001460000  |
| Al | -0.0012210000 | -0.5581910000 | -1.7941800000 |
| Al | -2.7114970000 | 1.4647810000  | -0.0000950000 |
| Al | -0.0002780000 | 2.6422970000  | -0.0000970000 |
| Al | 2.7102230000  | 1.4665230000  | -0.0000860000 |
| Al | 2.2978290000  | -1.1293130000 | -0.0008400000 |
| Al | 0.0001390000  | -0.5577350000 | 1.7948660000  |
| B  | -0.8057090000 | 0.5194380000  | 0.0003400000  |
| B  | 0.8052930000  | 0.5190740000  | -0.0003000000 |

11

energy

|    |               |               |               |
|----|---------------|---------------|---------------|
| Al | -1.1829970000 | 2.3354880000  | -0.1478480000 |
| Al | -2.9559950000 | 0.6307930000  | 0.3151020000  |
| Al | -2.0262790000 | -1.5845230000 | -0.6154700000 |
| Al | -0.0112610000 | 0.0483130000  | 1.3383140000  |
| Al | 0.0231490000  | -2.5775210000 | 0.7239950000  |

|    |               |               |               |
|----|---------------|---------------|---------------|
| Al | 2.8046690000  | 0.5139330000  | 0.4991440000  |
| Al | 1.3533410000  | 2.3806830000  | -0.2929080000 |
| Al | 2.0142920000  | -1.5839430000 | -0.7529160000 |
| B  | -0.8965560000 | 0.2994810000  | -0.8635250000 |
| B  | 0.8554970000  | 0.3169040000  | -0.8518480000 |
| B  | -0.0081330000 | -1.0407630000 | -1.0599020000 |

12

energy

|    |               |               |               |
|----|---------------|---------------|---------------|
| Al | -0.0005950000 | -0.1073450000 | -1.1327310000 |
| Al | 2.9705120000  | -0.5449570000 | -0.8081520000 |
| Al | 2.1388950000  | 1.6873120000  | 0.4658880000  |
| Al | 1.3154560000  | -2.3241350000 | 0.2755570000  |
| Al | -2.1388820000 | 1.6871730000  | 0.4651620000  |
| Al | -1.3147750000 | -2.3242480000 | 0.2752210000  |
| Al | 0.0000640000  | 2.6228710000  | -0.4026770000 |
| Al | -2.9708040000 | -0.5452500000 | -0.8071600000 |
| B  | 1.3887290000  | -0.1925590000 | 0.9510990000  |
| B  | 0.0002180000  | 0.8296700000  | 1.0752230000  |
| B  | -1.3886230000 | -0.1921750000 | 0.9515850000  |
| B  | 0.0000120000  | -0.8386350000 | 1.3612120000  |

13

energy

|    |               |               |               |
|----|---------------|---------------|---------------|
| Al | 1.4657980000  | -2.4729990000 | -0.3473020000 |
| Al | -1.3159390000 | -2.3267780000 | -0.3279090000 |
| Al | 2.8807970000  | 0.0002300000  | -0.5681040000 |
| Al | -2.6909670000 | -0.0006760000 | -1.1462090000 |
| Al | 1.4652640000  | 2.4734840000  | -0.3473450000 |
| Al | -1.3169640000 | 2.3263070000  | -0.3281320000 |
| Al | -1.8129370000 | 0.0000990000  | 1.3799030000  |
| Al | 0.1621520000  | 0.0001190000  | -0.7840150000 |
| B  | -0.0761460000 | -1.4772290000 | 1.1968200000  |
| B  | 1.4754170000  | -0.8367860000 | 1.0992130000  |
| B  | 1.4753790000  | 0.8371030000  | 1.0988960000  |
| B  | -0.0763700000 | 1.4773260000  | 1.1964200000  |
| B  | 0.2249950000  | 0.0001460000  | 1.8283470000  |

14

energy

|    |               |               |               |
|----|---------------|---------------|---------------|
| Al | 1.4146820000  | -2.3524040000 | -0.2219730000 |
| Al | 2.6964910000  | 0.0000060000  | -0.5575340000 |
| Al | 1.4146520000  | 2.3523930000  | -0.2219520000 |
| Al | -1.2080630000 | -1.7852800000 | -0.3485300000 |
| Al | -3.4889160000 | -0.0000330000 | -0.7446340000 |
| Al | -1.2081020000 | 1.7853070000  | -0.3484400000 |
| Al | 0.3529290000  | 0.0000700000  | -2.2307820000 |
| Al | -1.6536090000 | -0.0000320000 | 1.6549220000  |
| B  | 0.0925790000  | -1.4382340000 | 1.3865720000  |
| B  | 1.6804940000  | -0.8282830000 | 1.3270030000  |
| B  | 1.6804920000  | 0.8282600000  | 1.3270290000  |
| B  | 0.3855320000  | 0.0000030000  | 0.2631770000  |
| B  | 0.4361540000  | -0.0000240000 | 2.1588090000  |
| B  | 0.0925830000  | 1.4382070000  | 1.3866130000  |

15

energy

|    |               |               |               |
|----|---------------|---------------|---------------|
| Al | -0.1807660000 | -3.1029260000 | -0.6091760000 |
| Al | 2.5594530000  | -1.9076520000 | -0.0610880000 |
| Al | -3.1062710000 | -1.7428460000 | -0.1054920000 |
| Al | -3.4989690000 | 1.3900710000  | 0.4485690000  |
| Al | -0.6643160000 | 3.0237690000  | -0.6286720000 |
| Al | -0.2911540000 | -0.0660730000 | -1.2831460000 |
| Al | 3.7223250000  | 0.3546060000  | 0.5813530000  |
| Al | 2.0941870000  | 2.1186060000  | -0.5198080000 |
| B  | 0.6766890000  | -1.3866580000 | 0.7421990000  |
| B  | -0.9593050000 | -1.4841860000 | 0.6918740000  |
| B  | -1.9132500000 | -0.1463520000 | 0.8964540000  |
| B  | 1.4698930000  | 0.0946780000  | 0.7882120000  |
| B  | -1.1745990000 | 1.3268570000  | 0.7085220000  |
| B  | -0.2106400000 | -0.0151440000 | 1.1909360000  |

|        |              |              |              |
|--------|--------------|--------------|--------------|
| B      | 0.461540000  | 1.435162000  | 0.643199000  |
| 16     |              |              |              |
| energy |              |              |              |
| Al     | 0.634861000  | 0.665103000  | 1.755815000  |
| Al     | 2.465124000  | -1.129650000 | 0.642100000  |
| Al     | 0.826353000  | 2.628966000  | -0.237795000 |
| Al     | -2.606973000 | -1.041817000 | 0.928598000  |
| Al     | -0.114316000 | -1.814981000 | 1.172306000  |
| Al     | -1.809175000 | 1.583716000  | 0.912819000  |
| Al     | 1.158969000  | -2.245145000 | -1.282237000 |
| Al     | 2.801323000  | 1.089710000  | -0.473398000 |
| B      | 0.775284000  | 0.080608000  | -0.578458000 |
| B      | -1.022653000 | 2.619122000  | -1.052623000 |
| B      | -2.105147000 | 1.615503000  | -1.461111000 |
| B      | -2.249398000 | 0.040113000  | -1.432168000 |
| B      | -0.516977000 | 0.980295000  | -1.104608000 |
| B      | -0.625555000 | -0.708128000 | -1.022292000 |
| B      | -2.088865000 | -1.524809000 | -1.348713000 |
| B      | -0.892726000 | -2.416045000 | -0.887369000 |
| 17     |              |              |              |
| energy |              |              |              |
| Al     | -2.676982000 | 1.151671000  | -0.143028000 |
| Al     | -0.409170000 | 0.881609000  | 1.329257000  |
| Al     | -1.901210000 | -1.484759000 | -0.285299000 |
| Al     | 0.568345000  | -1.686635000 | 1.037177000  |
| Al     | -1.891398000 | -1.156020000 | 2.315799000  |
| Al     | 2.175945000  | 0.898856000  | 0.746192000  |
| Al     | 1.134332000  | 3.204706000  | 0.074737000  |
| Al     | 3.341165000  | -1.255029000 | -0.080290000 |
| B      | 1.257033000  | -0.404197000 | -0.905830000 |
| B      | 0.336586000  | -1.931727000 | -1.742545000 |
| B      | 1.675108000  | -2.062128000 | -0.895058000 |
| B      | -0.625582000 | 2.274913000  | -0.492067000 |
| B      | -1.064945000 | -1.457920000 | -2.344169000 |
| B      | -0.146402000 | -0.167099000 | -1.819879000 |
| B      | 0.525994000  | 1.054000000  | -0.878865000 |
| B      | -1.076739000 | 1.311458000  | -1.695576000 |
| B      | -1.767724000 | -0.058737000 | -2.211827000 |
| 9      |              |              |              |
| energy |              |              |              |
| Al     | 0.740300000  | 2.462552000  | 0.000084000  |
| Al     | -2.137816000 | -0.565878000 | 1.276113000  |
| Al     | -1.748430000 | 1.802366000  | -0.000809000 |
| Al     | -0.352499000 | -2.226434000 | 0.000359000  |
| Al     | 0.317389000  | 0.071833000  | 1.373296000  |
| Al     | -2.137266000 | -0.567575000 | -1.276728000 |
| Al     | 2.235305000  | -1.839801000 | -0.000037000 |
| Al     | 0.317665000  | 0.071883000  | -1.371532000 |
| Al     | 2.765352000  | 0.791056000  | -0.000746000 |
| 10     |              |              |              |
| energy |              |              |              |
| Al     | -0.206141000 | 0.082323000  | -1.312637000 |
| Al     | -2.862416000 | -0.703050000 | -0.299939000 |
| Al     | -2.212438000 | 1.830500000  | -0.196914000 |
| Al     | -0.679514000 | -2.374905000 | -0.454153000 |
| Al     | 0.415112000  | 2.428591000  | 0.246968000  |
| Al     | 2.108833000  | -1.129935000 | -0.901130000 |
| Al     | 2.799125000  | 1.289120000  | -0.218656000 |
| Al     | 1.096353000  | -1.655578000 | 1.444213000  |
| Al     | -0.845309000 | 0.114587000  | 1.484908000  |
| B      | 1.004628000  | 0.307701000  | 0.539083000  |
| 19     |              |              |              |
| energy |              |              |              |
| Al     | -1.132763000 | -2.131858000 | 0.760961000  |
| Al     | -0.895416000 | 0.716832000  | 1.305173000  |
| Al     | 3.741142000  | -0.941264000 | -0.935353000 |
| Al     | 1.456946000  | -1.059982000 | 0.820807000  |

|    |               |               |               |
|----|---------------|---------------|---------------|
| Al | 2.9607860000  | 1.4390150000  | 0.0688420000  |
| Al | 0.8532780000  | 2.9079150000  | 0.7353640000  |
| Al | -0.0607620000 | -1.2059780000 | 3.0217760000  |
| Al | -3.1016800000 | -0.1972080000 | -0.2303010000 |
| Al | -2.7961020000 | 2.3014050000  | -0.7411960000 |
| B  | -2.6087030000 | -1.9922600000 | -1.0411350000 |
| B  | -1.2940080000 | -2.6346730000 | -1.5101430000 |
| B  | -1.3181740000 | -0.9039970000 | -1.4752790000 |
| B  | 0.5476930000  | 1.3227780000  | -0.9459760000 |
| B  | 1.8017860000  | 0.2783960000  | -1.2527610000 |
| B  | 1.6128150000  | -1.3442570000 | -1.5084330000 |
| B  | 0.2501000000  | -0.2980580000 | -1.5305910000 |
| B  | -0.7529150000 | 2.1880800000  | -0.4805830000 |
| B  | -1.0931800000 | 0.6972110000  | -1.1483030000 |
| B  | 0.1884710000  | -2.0683040000 | -1.6025850000 |

20

energy

|    |               |               |               |
|----|---------------|---------------|---------------|
| Al | 0.2829550000  | -2.2213920000 | 1.0183120000  |
| Al | -1.9502100000 | -0.4711910000 | 1.0196990000  |
| Al | 0.7887270000  | 0.6173300000  | 1.1278720000  |
| Al | -4.0535880000 | 0.5115250000  | -0.5203210000 |
| Al | -0.3593160000 | -0.7454380000 | 3.1362580000  |
| Al | 3.2119850000  | 0.8446290000  | -0.3695930000 |
| Al | 2.7064820000  | -1.5792660000 | -0.6772080000 |
| Al | 2.1176480000  | 3.0962720000  | 0.4164610000  |
| Al | -1.9124490000 | 2.3906270000  | -0.2819790000 |
| B  | -2.3175770000 | -0.9791630000 | -1.2459900000 |
| B  | -0.1164750000 | -3.2410070000 | -1.0304350000 |
| B  | 1.3969560000  | -3.0966320000 | -0.8112640000 |
| B  | 0.5725450000  | -1.7102490000 | -1.4593930000 |
| B  | -0.3142680000 | 1.1083940000  | -1.2436910000 |
| B  | 1.3201050000  | 1.4707580000  | -1.0718020000 |
| B  | 0.9919100000  | -0.1260980000 | -1.3807620000 |
| B  | -1.8957620000 | 0.5597970000  | -1.3623670000 |
| B  | -0.6797570000 | -0.5814590000 | -1.4748060000 |
| B  | -1.3214590000 | -2.2215980000 | -1.1810590000 |
| B  | 0.1999730000  | 2.4652060000  | -0.3991320000 |

21

energy

|    |               |               |               |
|----|---------------|---------------|---------------|
| Al | 4.0037470000  | -1.4420930000 | -0.3049610000 |
| Al | 1.4509510000  | -1.3241940000 | -1.2702360000 |
| Al | 3.0280260000  | 1.1125620000  | -0.5690440000 |
| Al | -1.2004270000 | -2.0358470000 | -1.1930090000 |
| Al | 1.3931090000  | 3.1225550000  | 0.1190490000  |
| Al | -0.2762570000 | 0.8946610000  | -1.1211930000 |
| Al | -3.8117620000 | -1.5320500000 | -0.4256050000 |
| Al | -3.1037590000 | 1.0923030000  | -0.4565070000 |
| Al | -1.4359600000 | 3.2226160000  | -0.0290650000 |
| B  | 1.2516230000  | 0.8821530000  | 1.1070830000  |
| B  | 2.4177630000  | -0.2980240000 | 0.9029830000  |
| B  | 2.1215080000  | -1.9138550000 | 0.8768830000  |
| B  | 0.6757370000  | -2.5955680000 | 1.0975280000  |
| B  | 0.9723180000  | -0.8392290000 | 1.5002730000  |
| B  | -0.8690960000 | -2.9689280000 | 1.0281700000  |
| B  | -1.9488220000 | -0.3411260000 | 0.9933650000  |
| B  | -1.5894320000 | 1.2861850000  | 1.0649850000  |
| B  | -0.0640760000 | 1.8648920000  | 1.1614780000  |
| B  | -0.3374920000 | 0.2436650000  | 1.4195550000  |
| B  | -2.1189620000 | -2.0035200000 | 1.0046110000  |
| B  | -0.6350040000 | -1.4039740000 | 1.4945700000  |

22

energy

|    |               |               |               |
|----|---------------|---------------|---------------|
| Al | 3.9138700000  | -1.9538360000 | -0.5111800000 |
| Al | 1.4556500000  | 2.0029940000  | -0.7099560000 |
| Al | 1.5623360000  | -0.9676420000 | -1.3357610000 |
| Al | 3.8618450000  | 0.8602530000  | -0.2935070000 |
| Al | -2.9284440000 | -3.0480900000 | -0.2618110000 |

|    |               |               |               |
|----|---------------|---------------|---------------|
| Al | -3.8830120000 | -0.6080750000 | -0.2251280000 |
| Al | -2.5094960000 | 1.4735600000  | -0.5994210000 |
| Al | -1.1117410000 | -0.8471390000 | -1.1994050000 |
| Al | -1.4593440000 | 3.7708510000  | -0.3970750000 |
| B  | 0.8908680000  | 2.0672440000  | 1.4785390000  |
| B  | 1.8055150000  | 0.7438800000  | 1.3887570000  |
| B  | 2.6839890000  | -0.5754850000 | 0.8669210000  |
| B  | 0.1197630000  | 3.1739500000  | 0.6655750000  |
| B  | -0.8618040000 | 1.8850230000  | 1.0460770000  |
| B  | 0.1044630000  | 0.5470700000  | 1.5468440000  |
| B  | 1.1172060000  | -0.8404500000 | 1.3888370000  |
| B  | 0.4542970000  | -2.3854790000 | 0.9768840000  |
| B  | -2.1708420000 | -1.1836820000 | 0.9505650000  |
| B  | -1.5478290000 | 0.3819140000  | 1.1843800000  |
| B  | -0.5808680000 | -1.0107430000 | 1.4238250000  |
| B  | 2.0090210000  | -2.0845920000 | 0.6497500000  |
| B  | -1.1681030000 | -2.4941260000 | 0.8194810000  |

23

energy

|    |               |               |               |
|----|---------------|---------------|---------------|
| Al | 0.9545470000  | 0.0004520000  | -1.2583300000 |
| Al | -1.8880830000 | -0.0006200000 | -0.9047780000 |
| Al | 0.0456880000  | -2.7255420000 | -0.6790800000 |
| Al | -3.0776030000 | 2.4177040000  | -0.9284660000 |
| Al | 2.6492290000  | 2.5693570000  | -0.3433820000 |
| Al | 0.0436900000  | 2.7255240000  | -0.6792360000 |
| Al | 3.6277720000  | 0.0010250000  | -0.6166370000 |
| Al | 2.6511530000  | -2.5676790000 | -0.3443420000 |
| Al | -3.0766660000 | -2.4192520000 | -0.9280540000 |
| B  | -0.5677280000 | 2.4711200000  | 1.4448690000  |
| B  | 0.8582980000  | 1.7029470000  | 1.3654290000  |
| B  | 2.1827260000  | 0.8126470000  | 0.9408740000  |
| B  | 2.1831090000  | -0.8116760000 | 0.9408440000  |
| B  | 0.8347930000  | 0.0000990000  | 1.4691780000  |
| B  | -2.1189640000 | -0.0006720000 | 1.4645180000  |
| B  | -2.0179920000 | -1.5648320000 | 1.1010650000  |
| B  | -0.5662720000 | -2.4715240000 | 1.4449090000  |
| B  | 0.8593500000  | -1.7026650000 | 1.3657530000  |
| B  | -0.6174270000 | -0.8314560000 | 1.8957000000  |
| B  | -2.0191630000 | 1.5635120000  | 1.1009680000  |
| B  | -0.6176840000 | 0.8309660000  | 1.8952030000  |
| B  | -1.7042050000 | -3.0448940000 | 0.4722040000  |
| B  | -1.7061320000 | 3.0439100000  | 0.4724810000  |

24

energy

|    |               |               |               |
|----|---------------|---------------|---------------|
| Al | -2.3144010000 | -2.1159810000 | 1.6323120000  |
| Al | 0.3076010000  | -1.9096240000 | 1.0032480000  |
| Al | -1.6796650000 | -1.5233520000 | -1.1701010000 |
| Al | -1.9808350000 | 2.4583460000  | 1.2033740000  |
| Al | -1.8587860000 | 1.4956640000  | -1.3192820000 |
| Al | 1.7936700000  | -0.1163220000 | -2.4262420000 |
| Al | 0.6738280000  | 2.0987620000  | 0.9570580000  |
| Al | 3.1153570000  | 2.0034040000  | -0.2300370000 |
| Al | 2.7471780000  | -2.3077640000 | -0.1290700000 |
| B  | -2.1808310000 | 0.2926330000  | 1.9652850000  |
| B  | -2.9362700000 | -0.0236300000 | 0.6105420000  |
| B  | -1.1423080000 | 0.0422790000  | 0.5666400000  |
| B  | -3.5455840000 | -0.1109340000 | -0.8643710000 |
| B  | 2.1503460000  | -0.9202190000 | 1.6010860000  |
| B  | -0.6267660000 | 0.0609320000  | 2.2122090000  |
| B  | 1.0055370000  | 0.0546830000  | 2.2930110000  |
| B  | 0.0259340000  | 0.0999110000  | -0.6626710000 |
| B  | -0.2577070000 | 0.0047100000  | -2.3643220000 |
| B  | -1.7390650000 | -0.0764830000 | -2.9268240000 |
| B  | -3.1600000000 | -0.1296650000 | -2.3444460000 |
| B  | 2.2748220000  | 0.8131210000  | 1.5484660000  |
| B  | 3.1680070000  | -0.1629470000 | -0.9781790000 |
| B  | 3.2556540000  | -0.1706250000 | 0.6034620000  |

|        |               |               |               |
|--------|---------------|---------------|---------------|
| B      | 1.6179670000  | 0.0100940000  | -0.0151640000 |
| 25     |               |               |               |
| energy |               |               |               |
| Al     | -2.1641100000 | -0.5305410000 | 1.3690030000  |
| Al     | -1.7108720000 | 2.0611080000  | 0.0472610000  |
| Al     | 1.7185720000  | 1.7862020000  | -0.8361160000 |
| Al     | -1.6551920000 | -0.3403770000 | -1.5681790000 |
| Al     | -3.7801840000 | 0.5109960000  | -0.3527260000 |
| Al     | 3.1845320000  | -1.6157530000 | 1.1477920000  |
| Al     | 1.8470590000  | -1.0045130000 | -1.3311360000 |
| Al     | -1.8373600000 | -3.1005480000 | -0.6021660000 |
| Al     | 3.7890610000  | 0.4775720000  | -0.2712140000 |
| B      | -0.0807160000 | 2.1391540000  | -2.1786570000 |
| B      | 0.7383870000  | 1.5626880000  | 1.3016520000  |
| B      | 0.5319980000  | 0.0295860000  | 2.0499920000  |
| B      | -0.5450500000 | -2.3677670000 | 1.1352800000  |
| B      | -0.3937130000 | -1.4580670000 | 2.4247710000  |
| B      | 0.2514410000  | -2.2427630000 | -0.2444820000 |
| B      | -0.5516060000 | 1.3593130000  | 2.6869960000  |
| B      | -0.7794340000 | -0.1304440000 | 3.1244650000  |
| B      | 0.1798490000  | 3.1418770000  | 0.5586160000  |
| B      | -0.4216140000 | 2.7087010000  | 1.9077580000  |
| B      | 0.0099960000  | 0.7017630000  | -2.8144020000 |
| B      | -0.1038140000 | -2.0309940000 | -1.7944680000 |
| B      | 0.1091770000  | -0.8357350000 | -2.7763200000 |
| B      | 1.6218960000  | 0.2545320000  | 0.8280350000  |
| B      | 0.9582080000  | -1.4048560000 | 1.0513560000  |
| B      | 0.0570770000  | 3.1382330000  | -1.0271370000 |
| 11     |               |               |               |
| energy |               |               |               |
| Al     | 2.5346460000  | -1.6112760000 | -0.4404790000 |
| Al     | 1.1618920000  | -0.1291110000 | 1.4804690000  |
| Al     | 2.5036640000  | 0.9477270000  | -0.6207040000 |
| Al     | 0.7303810000  | 2.4694510000  | 0.6044070000  |
| Al     | 0.1553560000  | -2.4191080000 | 0.2338870000  |
| Al     | -0.0335750000 | -0.0026610000 | -1.1683860000 |
| Al     | -2.3112080000 | -2.0787280000 | -0.3649730000 |
| Al     | -2.7441440000 | 0.4129720000  | 0.3517470000  |
| Al     | -1.3970030000 | 2.3278650000  | -0.7988060000 |
| B      | -0.9112310000 | -0.6738300000 | 0.9105710000  |
| B      | -0.6487930000 | 0.8892870000  | 0.9688070000  |
| 12     |               |               |               |
| energy |               |               |               |
| Al     | -0.1285900000 | -0.0006290000 | -0.9094420000 |
| Al     | 2.4958980000  | 1.2643970000  | -0.9152060000 |
| Al     | 0.5564650000  | 2.4649250000  | 0.2755690000  |
| Al     | -1.9784270000 | 1.9997730000  | 0.2341390000  |
| Al     | 2.4994670000  | -1.2638790000 | -0.9124770000 |
| Al     | 1.7552320000  | 0.0007110000  | 1.3813970000  |
| Al     | 0.5570450000  | -2.4640360000 | 0.2737100000  |
| Al     | -3.0370170000 | -0.0008250000 | -1.1429630000 |
| Al     | -1.9780620000 | -2.0002800000 | 0.2356680000  |
| B      | -0.1883730000 | 0.8311040000  | 1.4034040000  |
| B      | -1.5530660000 | -0.0003910000 | 1.0399810000  |
| B      | -0.1877860000 | -0.8311210000 | 1.4035900000  |
| 13     |               |               |               |
| energy |               |               |               |
| Al     | -2.7710650000 | 0.9689220000  | -0.5114420000 |
| Al     | -0.8345370000 | 2.7713620000  | -0.1914220000 |
| Al     | -2.6343190000 | -1.7289730000 | -0.8116280000 |
| Al     | 1.6119260000  | -2.2847940000 | -0.7273230000 |
| Al     | 2.8275900000  | 0.0349680000  | -1.1938560000 |
| Al     | -0.4837120000 | -2.2250410000 | 0.9731180000  |
| Al     | 1.7927720000  | -0.3936430000 | 1.3427670000  |
| Al     | 1.6952590000  | 2.1403350000  | -0.0620070000 |
| Al     | -0.1304830000 | 0.0656620000  | -0.8015120000 |
| B      | -1.7322730000 | -0.4679650000 | 0.8968440000  |

|   |               |               |              |
|---|---------------|---------------|--------------|
| B | 0.4016580000  | 1.2921920000  | 1.3784930000 |
| B | -0.2602980000 | -0.2038380000 | 1.6916730000 |
| B | -1.2000060000 | 1.0727320000  | 1.1895850000 |

14

energy

|    |               |               |               |
|----|---------------|---------------|---------------|
| Al | 1.5040470000  | -1.9432600000 | 0.4493370000  |
| Al | -3.3555470000 | -0.3429890000 | -0.2729330000 |
| Al | -1.1886130000 | -2.2245800000 | 0.3609990000  |
| Al | 2.1882690000  | -0.5090270000 | -1.9009670000 |
| Al | 1.0321750000  | -0.1480240000 | 2.3758260000  |
| Al | -1.4167330000 | 0.4821540000  | 1.5106170000  |
| Al | 2.3802010000  | 0.8944620000  | 0.3309940000  |
| Al | 0.2569440000  | 2.5295490000  | 0.5764280000  |
| Al | -1.4965180000 | 1.5159040000  | -1.1976540000 |
| B  | 0.2745730000  | -1.4409250000 | -1.2838600000 |
| B  | -1.2107780000 | -0.6642790000 | -1.1681050000 |
| B  | 0.0890970000  | 0.0934250000  | -1.9729060000 |
| B  | 0.7771600000  | 1.3672690000  | -1.2177880000 |
| B  | 0.3189630000  | -0.0163820000 | -0.1622210000 |

15

energy

|    |               |               |               |
|----|---------------|---------------|---------------|
| Al | 3.1482080000  | -0.9499230000 | 0.2141430000  |
| Al | 0.5453110000  | -2.0741980000 | 1.0384250000  |
| Al | 2.1006100000  | 1.1186510000  | -1.6175680000 |
| Al | 1.1822940000  | -1.3879030000 | -1.6140100000 |
| Al | -3.8825850000 | -0.5216230000 | -0.6907190000 |
| Al | -1.8926360000 | -0.6275340000 | 1.4167790000  |
| Al | -1.3228880000 | -1.0144690000 | -1.3880640000 |
| Al | -2.1565530000 | 1.5301330000  | -0.1634510000 |
| Al | 0.4871670000  | 2.6046190000  | -0.0737590000 |
| B  | 2.1381190000  | 1.0129250000  | 0.5706060000  |
| B  | 1.6683290000  | -0.2143740000 | 1.6488500000  |
| B  | 0.0833900000  | -0.1148190000 | 2.0410740000  |
| B  | 0.9423980000  | 1.3187930000  | 1.6731840000  |
| B  | 0.4838990000  | 0.1885160000  | 0.2418840000  |
| B  | -0.6593450000 | 1.2467990000  | 1.3077860000  |

16

energy

|    |               |               |               |
|----|---------------|---------------|---------------|
| Al | 2.7250470000  | 0.9864840000  | -0.5560080000 |
| Al | 2.3917610000  | -1.5098320000 | -0.9107050000 |
| Al | 0.5138250000  | 2.4171370000  | 1.0425070000  |
| Al | 1.4280740000  | -0.0536900000 | 1.6633810000  |
| Al | 0.9073590000  | -2.5918100000 | 0.8451130000  |
| Al | -1.0871090000 | -0.9280570000 | 1.4526590000  |
| Al | -2.0900790000 | 1.4851550000  | 1.0414500000  |
| Al | -3.0236110000 | -0.9864210000 | -0.5397720000 |
| Al | -0.7672540000 | -2.2258930000 | -1.1629070000 |
| B  | -0.0137970000 | 2.7418780000  | -1.3982480000 |
| B  | 0.4473610000  | -0.4352920000 | -0.4699970000 |
| B  | 1.4630660000  | 2.4522360000  | -1.1540910000 |
| B  | 0.4447480000  | 1.1033750000  | -1.0810830000 |
| B  | -1.0361170000 | 0.1599450000  | -0.9179280000 |
| B  | -1.3796790000 | 1.9321940000  | -1.3477780000 |
| B  | -2.5204160000 | 0.9036720000  | -1.1077420000 |

17

energy

|    |               |               |               |
|----|---------------|---------------|---------------|
| Al | 0.8241290000  | -1.2613130000 | 1.2450430000  |
| Al | -1.4504610000 | -2.1175410000 | 0.1656680000  |
| Al | -2.2632190000 | -0.7561010000 | 2.3406750000  |
| Al | 2.8947490000  | -1.9743120000 | -0.7084280000 |
| Al | -0.3280490000 | 1.0567570000  | 1.6170240000  |
| Al | -2.4577060000 | 0.4511230000  | -0.1907740000 |
| Al | 2.7240850000  | 0.4221500000  | 0.4848300000  |
| Al | 1.6302290000  | 2.6751920000  | 0.6797230000  |
| Al | -0.2579410000 | 2.7445070000  | -0.9383300000 |
| B  | 0.4222480000  | -0.7872330000 | -1.1047970000 |
| B  | 0.8203300000  | 0.7366100000  | -0.5654590000 |

|   |               |               |               |
|---|---------------|---------------|---------------|
| B | -0.4318770000 | 0.5842470000  | -1.6128390000 |
| B | -1.6935570000 | 1.7235510000  | -1.9505870000 |
| B | -1.9020720000 | 0.2968000000  | -2.4737200000 |
| B | -1.1945100000 | -1.0770170000 | -2.1430610000 |
| B | -0.2625250000 | -2.2706670000 | -1.7341380000 |
| B | 0.8208420000  | -2.4314900000 | -0.6235220000 |

18

energy

|    |               |               |               |
|----|---------------|---------------|---------------|
| Al | -1.3358100000 | 2.5616260000  | -0.0894090000 |
| Al | -1.3790080000 | -0.2001790000 | -1.1732310000 |
| Al | -3.5475370000 | 1.2428700000  | -0.1303100000 |
| Al | -3.7226370000 | -1.7053880000 | -0.6996620000 |
| Al | 1.3360400000  | 2.5593700000  | -0.0895750000 |
| Al | 1.3737560000  | -0.2016890000 | -1.1680110000 |
| Al | 3.7214380000  | -1.7031190000 | -0.7025790000 |
| Al | 0.0009940000  | -2.6443020000 | 0.6280460000  |
| Al | 3.5485260000  | 1.2416500000  | -0.1339940000 |
| B  | 0.0014790000  | 0.8798240000  | 1.2836280000  |
| B  | -0.8852550000 | -0.6193160000 | 1.3005440000  |
| B  | -2.4988720000 | -0.3978600000 | 0.9039820000  |
| B  | -1.6062610000 | 0.9229950000  | 1.2064160000  |
| B  | 1.8658380000  | -1.8420850000 | 0.5714110000  |
| B  | 2.5008030000  | -0.3976670000 | 0.9036700000  |
| B  | 0.8881670000  | -0.6195870000 | 1.3046470000  |
| B  | 1.6088640000  | 0.9230500000  | 1.2096180000  |
| B  | -1.8637470000 | -1.8415350000 | 0.5687700000  |

2

energy

|    |              |              |               |
|----|--------------|--------------|---------------|
| Al | 0.0000000000 | 0.0000000000 | 0.5811780000  |
| B  | 0.0000000000 | 0.0000000000 | -1.5110620000 |

11

energy

|    |               |               |               |
|----|---------------|---------------|---------------|
| Al | -0.0027320000 | 0.0077600000  | 1.6842490000  |
| B  | 1.5630290000  | 1.3942160000  | -0.2906810000 |
| B  | 2.2880270000  | -0.0009770000 | -0.2042380000 |
| B  | 1.5634630000  | -1.3970390000 | -0.2808420000 |
| B  | 0.0009560000  | -1.6200220000 | -0.4952800000 |
| B  | 0.8112730000  | -0.0037620000 | -0.9081990000 |
| B  | 0.0006340000  | 1.6157220000  | -0.5065670000 |
| B  | -2.2868760000 | -0.0013580000 | -0.2073400000 |
| B  | -1.5619900000 | 1.3940140000  | -0.2926330000 |
| B  | -0.8095660000 | -0.0038330000 | -0.9101190000 |
| B  | -1.5618480000 | -1.3971360000 | -0.2831480000 |

12

energy

|    |               |               |               |
|----|---------------|---------------|---------------|
| Al | 2.2937100000  | -0.0007860000 | -0.0281860000 |
| B  | 0.0541730000  | -2.4859830000 | -0.0364500000 |
| B  | 0.1912240000  | -0.8444740000 | 0.1122670000  |
| B  | -1.2640940000 | 0.0004670000  | 0.1027170000  |
| B  | -2.6796580000 | -0.7740520000 | -0.0551720000 |
| B  | -2.6790190000 | 0.7759030000  | -0.0552400000 |
| B  | -1.3872390000 | -1.7623460000 | -0.0116390000 |
| B  | -1.3856050000 | 1.7626950000  | -0.0117840000 |
| B  | 1.4683220000  | -1.8717070000 | -0.0236980000 |
| B  | 1.4699020000  | 1.8710620000  | -0.0235680000 |
| B  | 0.1924470000  | 0.8445290000  | 0.1122890000  |
| B  | 0.0559000000  | 2.4859490000  | -0.0364390000 |

13

energy

|    |               |               |               |
|----|---------------|---------------|---------------|
| Al | -3.5405020000 | 0.0005090000  | -0.2874920000 |
| B  | -1.5320670000 | -0.8213770000 | 0.4710430000  |
| B  | 1.2772840000  | -2.3611310000 | 0.2110090000  |
| B  | -0.2531820000 | 0.0006990000  | -0.1443730000 |
| B  | -0.2121820000 | -1.7476150000 | 0.2885230000  |
| B  | 2.6031250000  | -1.5943330000 | -0.0271510000 |
| B  | 2.7938440000  | -0.0013370000 | -0.2018210000 |
| B  | 1.1896730000  | -0.8448760000 | -0.3967750000 |

|   |               |              |               |
|---|---------------|--------------|---------------|
| B | 1.2807790000  | 2.3604240000 | 0.2104000000  |
| B | 1.1909780000  | 0.8446000000 | -0.3989220000 |
| B | -0.2094400000 | 1.7487230000 | 0.2882740000  |
| B | 2.6054390000  | 1.5915330000 | -0.0273820000 |
| B | -1.5289450000 | 0.8233670000 | 0.4746530000  |

14

energy

|    |               |               |               |
|----|---------------|---------------|---------------|
| Al | -1.2283060000 | -0.0020910000 | 1.6729880000  |
| B  | 3.3631700000  | -0.0003330000 | 0.2288310000  |
| B  | 1.8833830000  | 0.0002560000  | -0.5053410000 |
| B  | 2.6005170000  | -1.3574280000 | 0.1693460000  |
| B  | 1.0524570000  | -1.5624790000 | -0.2668050000 |
| B  | 0.2465620000  | 0.0004680000  | -0.4872450000 |
| B  | -0.5547970000 | -1.5506560000 | -0.4808920000 |
| B  | 2.6009600000  | 1.3570390000  | 0.1708790000  |
| B  | -0.5545100000 | 1.5518170000  | -0.4781290000 |
| B  | 1.0529610000  | 1.5631550000  | -0.2647300000 |
| B  | -2.1502590000 | 1.3585900000  | -0.4471510000 |
| B  | -1.2906880000 | 0.0011380000  | -0.9982810000 |
| B  | -2.9055980000 | 0.0009240000  | -0.5408570000 |
| B  | -2.1505620000 | -1.3570530000 | -0.4493950000 |

15

energy

|    |               |               |               |
|----|---------------|---------------|---------------|
| Al | -1.7672410000 | 0.0010030000  | 1.6501650000  |
| B  | 2.3370560000  | 1.7649060000  | 0.0392540000  |
| B  | 0.8134390000  | 1.6545680000  | -0.2054670000 |
| B  | 3.4814490000  | 0.7649870000  | 0.1227540000  |
| B  | 1.8846880000  | 0.0014470000  | -0.1461950000 |
| B  | 0.1166660000  | -0.0005010000 | -0.2341310000 |
| B  | 2.3339350000  | -1.7646850000 | 0.0391640000  |
| B  | 3.4793930000  | -0.7663220000 | 0.1230320000  |
| B  | 0.8100540000  | -1.6598410000 | -0.2050820000 |
| B  | -2.3332540000 | 1.3614230000  | -0.6036650000 |
| B  | -0.7584680000 | 1.5187360000  | -0.4552170000 |
| B  | -3.0762000000 | 0.0015290000  | -0.7659100000 |
| B  | -2.3355190000 | -1.3593290000 | -0.6028660000 |
| B  | -1.3976290000 | -0.0000760000 | -0.9417480000 |
| B  | -0.7607850000 | -1.5194490000 | -0.4543510000 |

16

energy

|    |               |               |               |
|----|---------------|---------------|---------------|
| Al | -3.4903500000 | -1.2388460000 | -0.1623660000 |
| B  | 3.7149470000  | 1.1269370000  | 0.0709740000  |
| B  | 2.7425270000  | -0.1743880000 | -0.3548120000 |
| B  | -0.4068470000 | 0.2023580000  | -0.1146070000 |
| B  | 0.5717390000  | 1.6782760000  | -0.1106150000 |
| B  | 0.2073160000  | -1.4406510000 | 0.0746440000  |
| B  | 4.3065720000  | -0.3339290000 | 0.1324260000  |
| B  | -3.6106070000 | 0.8079510000  | 0.1990750000  |
| B  | 1.1597980000  | 0.0697540000  | -0.0830950000 |
| B  | -2.0200690000 | 0.3629030000  | 0.2727140000  |
| B  | -2.5912130000 | 1.9529880000  | 0.0660840000  |
| B  | 3.3919880000  | -1.6115370000 | 0.2060220000  |
| B  | -1.0132280000 | 1.9253600000  | 0.0307850000  |
| B  | 1.8120720000  | -1.6520050000 | 0.0186830000  |
| B  | -1.3685190000 | -1.2069060000 | 0.1487520000  |
| B  | 2.1784330000  | 1.5138870000  | -0.1348780000 |

17

energy

|    |               |               |               |
|----|---------------|---------------|---------------|
| Al | -3.2066070000 | 0.6326680000  | 1.0640350000  |
| B  | -1.6190580000 | 1.6127540000  | -0.4583290000 |
| B  | -2.0586670000 | 0.1317720000  | -0.8200270000 |
| B  | -0.4172210000 | 0.5471010000  | -0.9253330000 |
| B  | -1.3967030000 | -2.4830990000 | -0.0069420000 |
| B  | -2.4396610000 | -1.3449800000 | -0.2610270000 |
| B  | -0.8502550000 | -1.0830620000 | -0.6367120000 |
| B  | 0.7688390000  | -0.7246820000 | -0.6290500000 |
| B  | 0.2112870000  | -2.2841480000 | -0.0565390000 |

|   |               |               |               |
|---|---------------|---------------|---------------|
| B | 1.7827980000  | -1.8536550000 | 0.2599970000  |
| B | 2.2382080000  | -0.2262150000 | -0.0435960000 |
| B | 3.6098920000  | 0.2375050000  | 0.7046770000  |
| B | 2.6907180000  | 1.4926050000  | 0.2786000000  |
| B | 3.2057720000  | -1.2543300000 | 0.7454340000  |
| B | 1.4746820000  | 2.4747560000  | 0.0345780000  |
| B | -0.0509780000 | 2.1256130000  | -0.3174560000 |
| B | 1.1875220000  | 0.9871270000  | -0.6347650000 |

3

|        |               |               |              |
|--------|---------------|---------------|--------------|
| energy |               |               |              |
| Al     | 0.0000000000  | 0.8127590000  | 0.0000000000 |
| B      | 0.7766290000  | -1.0565710000 | 0.0000000000 |
| B      | -0.7766290000 | -1.0566030000 | 0.0000000000 |

4

|        |               |               |               |
|--------|---------------|---------------|---------------|
| energy |               |               |               |
| Al     | 1.6569770000  | 0.0000010000  | -0.0000210000 |
| B      | -1.8887240000 | 0.7579140000  | -0.0000430000 |
| B      | -1.8887680000 | -0.7578850000 | -0.0000430000 |
| B      | -0.5306490000 | -0.0000310000 | 0.0001390000  |

5

|        |               |               |               |
|--------|---------------|---------------|---------------|
| energy |               |               |               |
| Al     | -1.4039340000 | -0.6677250000 | 0.0000000000  |
| B      | 0.0000000000  | 0.8576890000  | -0.0000000000 |
| B      | 1.3235380000  | 1.6532240000  | -0.0000000000 |
| B      | 1.7084430000  | 0.1682600000  | -0.0000000000 |
| B      | 0.6182470000  | -0.9430900000 | -0.0000000000 |

6

|        |               |               |               |
|--------|---------------|---------------|---------------|
| energy |               |               |               |
| Al     | 2.5461510000  | 0.1096390000  | -0.0000990000 |
| B      | 0.3597820000  | -0.1912490000 | 0.0003060000  |
| B      | -2.4151750000 | -0.5841840000 | -0.0002100000 |
| B      | -2.5701960000 | 0.9503680000  | -0.0001330000 |
| B      | -0.9491190000 | -1.1033020000 | 0.0000570000  |
| B      | -1.0452840000 | 0.6433070000  | 0.0002390000  |

7

|        |               |               |               |
|--------|---------------|---------------|---------------|
| energy |               |               |               |
| Al     | 1.7108420000  | -0.0000270000 | -0.1141420000 |
| B      | 0.2521920000  | -1.5093450000 | 0.1243870000  |
| B      | -1.2713090000 | -1.4073980000 | -0.0712940000 |
| B      | -1.9985730000 | 0.0000210000  | -0.2154820000 |
| B      | -1.2712270000 | 1.4074320000  | -0.0714070000 |
| B      | 0.2522570000  | 1.5093440000  | 0.1244870000  |
| B      | -0.4115290000 | 0.0000160000  | 0.4060780000  |

8

|        |               |               |               |
|--------|---------------|---------------|---------------|
| energy |               |               |               |
| Al     | 1.9282300000  | 0.0000940000  | -0.0000330000 |
| B      | -0.8817270000 | 1.8193820000  | 0.0003370000  |
| B      | 0.5893330000  | 1.5278170000  | -0.0004390000 |
| B      | -0.4021970000 | -0.0000670000 | -0.0000580000 |
| B      | -2.0134250000 | 0.7908030000  | 0.0002240000  |
| B      | -0.8815260000 | -1.8193200000 | 0.0000530000  |
| B      | 0.5895600000  | -1.5278980000 | -0.0000360000 |
| B      | -2.0134150000 | -0.7909620000 | 0.0000050000  |

9

|        |               |               |               |
|--------|---------------|---------------|---------------|
| energy |               |               |               |
| Al     | 0.0008820000  | -0.0006770000 | 1.3070810000  |
| B      | -0.6083400000 | -1.6706800000 | -0.3692150000 |
| B      | 0.9270620000  | -1.5169980000 | -0.3697860000 |
| B      | -0.0004890000 | 0.0003590000  | -0.8146530000 |
| B      | -1.6859990000 | -0.5662360000 | -0.3688370000 |
| B      | 1.7643850000  | -0.2208100000 | -0.3700610000 |
| B      | 1.2727650000  | 1.2419310000  | -0.3690540000 |
| B      | -0.1773990000 | 1.7692510000  | -0.3685920000 |
| B      | -1.4942770000 | 0.9649430000  | -0.3682120000 |

10

|        |               |              |              |
|--------|---------------|--------------|--------------|
| energy |               |              |              |
| Al     | -0.0000000000 | 0.0000000000 | 0.0007440000 |

|   |              |              |              |
|---|--------------|--------------|--------------|
| B | 0.000000000  | 2.219212000  | -0.391663000 |
| B | 0.000000000  | 0.770925000  | 2.118176000  |
| B | -0.000000000 | -0.770925000 | 2.118176000  |
| B | -0.000000000 | -2.219212000 | -0.391663000 |
| B | 0.000000000  | 0.000000000  | -2.254486000 |
| B | 0.000000000  | 1.448603000  | -1.726961000 |
| B | 0.000000000  | 1.951708000  | 1.126725000  |
| B | -0.000000000 | -1.951708000 | 1.126725000  |
| B | -0.000000000 | -1.448603000 | -1.726961000 |
